# Supplementary material
Source: PubMed Central journal article supplement (PMC3084103)

Supporting Information

**Diversity-oriented synthesis leads to an effective class of bifunctional linchpins  
uniting anion relay chemistry (ARC) with benzyne reactivity**

Amos B. Smith, III,\* Won-Suk Kim

*Department of Chemistry, Laboratory for Research on the Structure of Matter, and Monell Chemical  
Senses Center, University of Pennsylvania, Philadelphia, PA 19104, U.S.A.*

Table of Contents:

|                                                  |          |
|--------------------------------------------------|----------|
| -General Methods and Experimental Procedures     | S2-S28   |
| - <sup>1</sup> H and <sup>13</sup> C NMR Spectra | S29-S120 |

## Experimental

### I. Materials and Methods

Unless otherwise indicated, all reactions were carried out under an argon atmosphere in flame- or oven-dried glassware equipped with a magnetic stir bar. After aqueous work-up, all organic extracts were dried over sodium or magnesium sulfate, and filtered prior to concentration. Diethyl ether and THF were obtained from a Pure Solv™ PS-400. MeLi (1.6 M in Et<sub>2</sub>O), *n*-BuLi (2.5 M in Hexane), KHMDS (0.5 M in toluene) and TBAF (1.0 M in THF) were purchased from Sigma-Aldrich®, and used without purification. Reactions were monitored by thin layer chromatography (TLC) with 0.25-mm E. Merck pre-coated silica gel plates (Kieselgel 60F<sub>254</sub>, Merck). Spots were detected by viewing under a UV light, staining with an anisaldehyde solution composed of acetic acid, sulfuric acid, and MeOH, or staining with a KMnO<sub>4</sub> solution composed of potassium carbonate, sodium hydroxide, and water. Silica gel for flash chromatography (particle size 0.040-0.063 mm) was supplied by Silicycle and Sorbent technologies. Yields refer to chromatographically and spectroscopically pure compounds unless otherwise noted. <sup>1</sup>H and <sup>13</sup>C spectra were recorded on a Bruker AM-500 spectrometer. Chemical shifts are reported as δ values relative to internal chloroform (δ7.26 for <sup>1</sup>H and δ 77.0 for <sup>13</sup>C). IR spectra were measured as neat oils on a Perkin-Elmer Model 1600 FTIR. Optical rotations were measured on a Jasco polarimeter. High resolution mass spectra were obtained at the University of Pennsylvania Mass Spectrometry Service Center.

## II. Experimental Section

### “Natural Product-Like” Libraries Synthesis

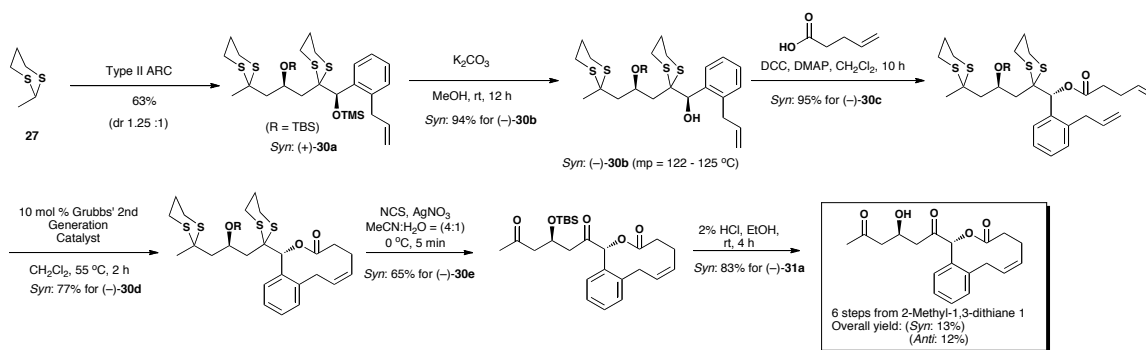

**General procedure for 10-membered ring macrolides (31a-31l):** To a solution of (+)-30a (1.94 g, 3.02 mmol, 1.0 equiv) in MeOH (40 mL) was added  $\text{K}_2\text{CO}_3$  (4.17, 30.2 mmol, 10.0 equiv) at ambient temperature. After stirring overnight at ambient temperature,  $\text{H}_2\text{O}$  (100 mL) was added. The resulting mixture was then extracted with  $\text{Et}_2\text{O}$  (50 mL X 3). The combined organic layers were washed with brine (50 mL), dried over  $\text{MgSO}_4$ , filtered and concentrated *in vacuo*. Flash chromatography on silica gel, using diethyl ether/hexane (1/10), provided (-)-30b (1.62 g, 2.84 mmol, 94%). To a solution of (-)-30b (247.0 mg, 0.43 mmol, 1.0 equiv) in  $\text{CH}_2\text{Cl}_2$  (12 mL) were added DCC (1.0 M in  $\text{CH}_2\text{Cl}_2$ , 4.3 mL, 4.3 mmol, 10.0 equiv), DMAP (26.8 mg, 0.22 mmol, 0.5 equiv) and 4-pentenoic acid (0.44 mL, 4.3 mmol, 10.0 equiv) dropwise at ambient temperature. After stirring for 10 h,  $\text{CH}_2\text{Cl}_2$  was evaporated, and then filtered through celite with diethyl ether. The filtrates were concentrated *in vacuo* and flash chromatography on silica gel, using diethyl ether/hexane (1/20), provided (-)-30c (267.8 mg, 0.41 mmol, 95%) as pale yellow oil. To a solution of (-)-30c (60.5 mg, 0.093 mmol, 1.0 equiv) in  $\text{CH}_2\text{Cl}_2$  (0.003M, 31 mL) at was added 2<sup>nd</sup> generation Grubbs catalyst (7.89 mg, 0.0093 mmol, 0.1 equiv) at ambient temperature. After stirring for 2 h at 55 °C,  $\text{CH}_2\text{Cl}_2$  was evaporated, and then the crude product was purified by flash chromatography on silica gel, using diethyl ether/hexane (1/10) to provide (-)-30d (45.1 mg, 0.072 mmol, 77%) as pale yellow oil. To a solution of dithiane (-)-30d (39.5 mg, 0.063 mmol, 1.0 equiv) in aqueous  $\text{CH}_3\text{CN}$  (80%, 7.5 mL) at 0 °C was added NCS (50.5 mg, 0.378 mmol, 6.0 equiv) and  $\text{AgNO}_3$  (107.0 mg, 0.63 mmol, 10.0 equiv). After being stirred for 5 min at 0 °C, a saturated aqueous  $\text{NaHSO}_3$  (3 mL), and  $\text{NaHCO}_3$  (3 mL) were

added. The resulting mixture was then extracted with Et<sub>2</sub>O (10 mL X 3). The combined organic layers were washed with brine (3 mL), dried over MgSO<sub>4</sub>, filtered and concentrated *in vacuo*. Flash chromatography on silica gel, using ethyl acetate/hexane (1/4), provided (–)-**30e** (18.2 mg, 0.041 mmol, 65%) as pale yellow oil. Silyl ether (–)-**30e** (16.1 mg, 0.036 mmol, 1.0 equiv) was treated with 2% HCl in EtOH (3 mL). After stirring for 4 h at ambient temperature, a saturated aqueous NH<sub>4</sub>Cl solution (5 mL) was added. The resulting mixture was then extracted with CH<sub>2</sub>Cl<sub>2</sub> (10 mL X 3). The combined organic layers were washed with brine (5 mL), dried over MgSO<sub>4</sub>, filtered and concentrated *in vacuo*. Flash chromatography on silica gel, using ethyl acetate/hexane (1/2), provided (–)-**31a** (9.9 mg, 0.03 mmol, 83%) as pale yellow oil. R<sub>f</sub> 0.1 (hexane/ethyl acetate = 3/1)

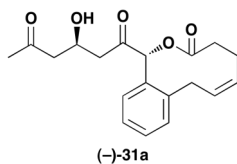

**Compounds (–)-31a.** [ $\alpha$ ]<sub>D</sub><sup>20</sup> –133.9 (c 0.18 CDCl<sub>3</sub>); IR (film) 3462 (m), 3010 (m), 2920 (m), 2858 (m), 1721 (s), 1359 (m), 1241 (s), 1065 (s), 745 (m) cm<sup>-1</sup>; <sup>1</sup>H NMR (500 MHz, CDCl<sub>3</sub>)  $\delta$  7.36-7.22 (m, 4H), 6.10 (s, 1H), 5.49 (td, *J* = 10.5 and 4.5 Hz, 1H), 5.41-5.35 (m, 1H), 4.47-4.41 (m, 1H), 4.10 (t, *J* = 11.5 Hz, 1H), 3.30 (br, 1H), 3.14-3.06 (m, 1H), 2.91 (dd, *J* = 12.5 and 4.5 Hz, 1H), 2.84 (dd, *J* = 17.0 and 7.5 Hz, 1H), 2.72-2.53 (m, 4H), 2.31-2.25 (m, 1H), 2.13 (s, 3H), 2.12-2.07 (m, 1H); <sup>13</sup>C NMR (125 MHz, CDCl<sub>3</sub>)  $\delta$  208.3, 203.1, 170.5, 140.0, 132.7, 132.4, 130.9, 130.5, 129.3, 126.5, 125.8, 82.1, 64.2, 48.9, 44.8, 34.0, 32.6, 30.7, 22.9; high resolution mass spectrum (ES<sup>+</sup>) *m/z* 353.1380 [(M+Na)<sup>+</sup>; calcd for C<sub>19</sub>H<sub>22</sub>O<sub>5</sub>Na: 353.1365].

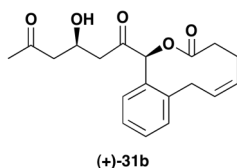

**Compounds (+)-31b.** [ $\alpha$ ]<sub>D</sub><sup>20</sup> +75.2 (c 0.25 CDCl<sub>3</sub>); IR (film) 3485 (m), 3011 (m), 2922 (m), 2858 (m), 1720 (s), 1359 (m), 1242 (s), 1066 (s), 745 (m) cm<sup>-1</sup>; <sup>1</sup>H NMR (500 MHz, CDCl<sub>3</sub>)  $\delta$  7.35-7.21 (m, 4H), 6.10 (s, 1H), 5.49 (td, *J* = 11.0 and 4.5 Hz, 1H), 5.41-5.35 (m, 1H), 4.47-4.42 (m, 1H), 4.10 (t, *J* = 11.8 Hz, 1H), 3.27 (br, 1H), 3.13-3.05 (m, 1H),

2.91 (dd,  $J = 13.0$  and  $4.5$  Hz, 1H), 2.82 (dd,  $J = 17.0$  and  $5.5$  Hz, 1H), 2.72-2.58 (m, 4H), 2.32-2.26 (m, 1H), 2.14 (s, 3H), 2.13-2.10 (m, 1H);  $^{13}\text{C}$  NMR (125 MHz,  $\text{CDCl}_3$ )  $\delta$  208.4, 203.2, 170.6, 140.0, 132.8, 132.4, 130.9, 130.4, 129.4, 126.6, 125.8, 82.0, 63.9, 48.8, 44.7, 33.9, 32.7, 30.7, 22.9; high resolution mass spectrum ( $\text{ES}^+$ )  $m/z$  331.1557  $[(\text{M}+\text{H})^+]$ ; calcd for  $\text{C}_{19}\text{H}_{23}\text{O}_5$ : 331.1557].

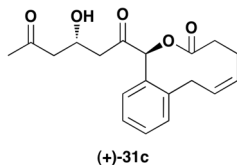

**Compounds (+)-31c.**  $[\alpha]_D^{20} +166.2$  (c 0.18  $\text{CDCl}_3$ ); IR (film) 3462 (m), 3010 (m), 2920 (m), 2858 (m), 1721 (s), 1359 (m), 1241 (s), 1065 (s), 745 (m)  $\text{cm}^{-1}$ ;  $^1\text{H}$  NMR (500 MHz,  $\text{CDCl}_3$ )  $\delta$  7.36-7.22 (m, 4H), 6.10 (s, 1H), 5.49 (td,  $J = 10.5$  and  $4.5$  Hz, 1H), 5.41-5.35 (m, 1H), 4.47-4.41 (m, 1H), 4.10 (t,  $J = 11.5$  Hz, 1H), 3.30 (br, 1H), 3.14-3.06 (m, 1H), 2.91 (dd,  $J = 12.5$  and  $4.5$  Hz, 1H), 2.84 (dd,  $J = 17.0$  and  $7.5$  Hz, 1H), 2.72-2.53 (m, 4H), 2.31-2.25 (m, 1H), 2.13 (s, 3H), 2.12-2.07 (m, 1H);  $^{13}\text{C}$  NMR (125 MHz,  $\text{CDCl}_3$ )  $\delta$  208.3, 203.1, 170.5, 140.0, 132.7, 132.4, 130.9, 130.5, 129.3, 126.5, 125.8, 82.1, 64.2, 48.9, 44.8, 34.0, 32.6, 30.7, 22.9; high resolution mass spectrum ( $\text{ES}^+$ )  $m/z$  353.1348  $[(\text{M}+\text{Na})^+]$ ; calcd for  $\text{C}_{19}\text{H}_{22}\text{O}_5\text{Na}$ : 353.1365].

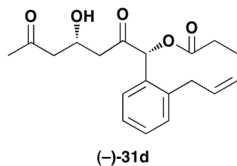

**Compounds (-)-31d.**  $[\alpha]_D^{20} -142.6$  (c 1.34  $\text{CDCl}_3$ ); IR (film) 3485 (m), 3011 (m), 2922 (m), 2858 (m), 1720 (s), 1359 (m), 1242 (s), 1066 (s), 745 (m)  $\text{cm}^{-1}$ ;  $^1\text{H}$  NMR (500 MHz,  $\text{CDCl}_3$ )  $\delta$  7.35-7.21 (m, 4H), 6.10 (s, 1H), 5.49 (td,  $J = 11.0$  and  $4.5$  Hz, 1H), 5.41-5.35 (m, 1H), 4.47-4.42 (m, 1H), 4.10 (t,  $J = 11.8$  Hz, 1H), 3.27 (br, 1H), 3.13-3.05 (m, 1H), 2.91 (dd,  $J = 13.0$  and  $4.5$  Hz, 1H), 2.82 (dd,  $J = 17.0$  and  $5.5$  Hz, 1H), 2.72-2.58 (m, 4H), 2.32-2.26 (m, 1H), 2.14 (s, 3H), 2.13-2.10 (m, 1H);  $^{13}\text{C}$  NMR (125 MHz,  $\text{CDCl}_3$ )  $\delta$  208.4, 203.2, 170.6, 140.0, 132.8, 132.4, 130.9, 130.4, 129.4, 126.6, 125.8, 82.0, 63.9, 48.8, 44.7, 33.9, 32.7, 30.7, 22.9; high resolution mass spectrum ( $\text{ES}^-$ )  $m/z$  329.1394  $[(\text{M}-\text{H})^-]$ ; calcd for  $\text{C}_{19}\text{H}_{21}\text{O}_5$ : 329.1389].

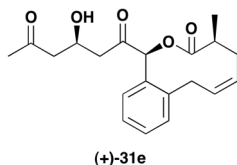

**Compounds (+)-31e.**  $[\alpha]_D^{20} +169.5$  (c 0.47  $\text{CDCl}_3$ ); IR (film) 3447 (m), 2925 (s), 2857 (m), 1719 (s), 1373 (m), 1242 (s), 1081 (s), 759 (m)  $\text{cm}^{-1}$ ;  $^1\text{H}$  NMR (500 MHz,  $\text{CDCl}_3$ )  $\delta$  7.33 (d,  $J = 7.3$  Hz, 1H), 7.30-7.26 (m, 1H), 7.24-7.21 (m, 2H), 6.04 (s, 1H), 5.51-5.44 (m, 1H), 5.40 (td,  $J = 10.7$  and 6.1 Hz, 1H), 4.47-4.41 (m, 1H), 4.10 (t,  $J = 11.9$  Hz, 1H), 3.28 (d,  $J = 4.0$  Hz, 1H), 3.04-2.97 (m, 1H), 2.90-2.86 (m, 1H), 2.82 (dd,  $J = 17.4$  and 5.4 Hz, 1H), 2.71 (dd,  $J = 17.4$  and 6.8 Hz, 1H), 2.67-2.58 (m, 2H), 2.55-2.43 (m, 1H), 2.14 (s, 3H), 1.99-1.95 (m, 1H), 1.33 (d,  $J = 7.1$  Hz, 3H);  $^{13}\text{C}$  NMR (125 MHz,  $\text{CDCl}_3$ )  $\delta$  208.4, 203.2, 173.4, 139.8, 132.5, 132.4, 131.0, 130.4, 129.3, 126.5, 125.4, 82.0, 63.9, 48.8, 44.7, 40.5, 32.7, 31.8, 30.7, 17.9; high resolution mass spectrum ( $\text{ES}^+$ )  $m/z$  367.1518  $[(\text{M}+\text{Na})^+]$ ; calcd for  $\text{C}_{20}\text{H}_{24}\text{O}_5\text{Na}$ : 367.1521].

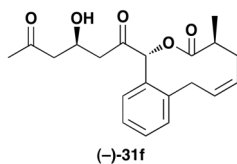

**Compounds (-)-31f.**  $[\alpha]_D^{20} -95.5$  (c 1.18  $\text{CDCl}_3$ ); IR (film) 3439 (m), 2922 (s), 2853 (m), 1715 (s), 1362 (m), 1184 (s), 1094 (m), 741 (m)  $\text{cm}^{-1}$ ;  $^1\text{H}$  NMR (500 MHz,  $\text{CDCl}_3$ )  $\delta$  7.31-7.26 (m, 2H), 7.23-7.20 (m, 2H), 6.05 (s, 1H), 5.52-5.47 (m, 1H), 5.45 (td,  $J = 10.1$  and 6.3 Hz, 1H), 4.48-4.42 (m, 1H), 4.01 (t,  $J = 11.3$  Hz, 1H), 3.36 (br, 1H), 3.24-3.18 (m, 1H), 2.95-2.87 (m, 2H), 2.84 (dd,  $J = 17.1$  and 7.6 Hz, 1H), 2.62 (dd,  $J = 17.1$  and 4.9 Hz, 1H), 2.55-2.51 (m, 2H), 2.12 (s, 3H), 2.09-2.04 (m, 1H), 1.13 (d,  $J = 7.1$  Hz, 3H);  $^{13}\text{C}$  NMR (125 MHz,  $\text{CDCl}_3$ )  $\delta$  208.3, 203.5, 173.4, 139.6, 133.5, 132.1, 130.9, 130.4, 129.2, 126.5, 123.2, 82.1, 64.1, 48.9, 45.0, 38.3, 32.4, 30.7, 29.8, 13.9; high resolution mass spectrum ( $\text{ES}^+$ )  $m/z$  367.1503  $[(\text{M}+\text{Na})^+]$ ; calcd for  $\text{C}_{20}\text{H}_{24}\text{O}_5\text{Na}$ : 367.1521].

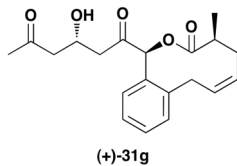

**Compounds (+)-31g.**  $[\alpha]_D^{20} +141.2$  (c 1.35  $\text{CDCl}_3$ ); IR (film) 3420 (m), 2922 (m), 1717 (s), 1375 (m), 1242 (s), 1084 (s), 761 (m)  $\text{cm}^{-1}$ ;  $^1\text{H}$  NMR (500 MHz,  $\text{CDCl}_3$ )  $\delta$  7.34 (d,  $J$

= 7.4 Hz, 1H), 7.30-7.26 (m, 1H), 7.23-7.20 (m, 2H), 6.04 (s, 1H), 5.47-5.42 (m, 1H), 5.40 (td,  $J = 10.8$  and  $6.1$  Hz, 1H), 4.47-4.42 (m, 1H), 4.10 (t,  $J = 11.9$  Hz, 1H), 3.37 (br, 1H), 3.04-2.97 (m, 1H), 2.89-2.83 (m, 2H), 2.61 (dd,  $J = 17.1$  and  $5.1$  Hz, 1H), 2.55-2.52 (m, 2H), 2.51-2.44 (m, 1H), 2.12 (s, 3H), 1.99-1.94 (m, 1H), 1.33 (d,  $J = 7.1$  Hz, 3H);  $^{13}\text{C}$  NMR (125 MHz,  $\text{CDCl}_3$ )  $\delta$ 208.3, 203.0, 173.3, 139.8, 132.4, 132.3, 130.9, 130.5, 129.2, 126.4, 125.4, 82.0, 64.1, 48.9, 44.8, 40.6, 32.6, 31.7, 30.6, 17.9; high resolution mass spectrum ( $\text{ES}^+$ )  $m/z$  345.1695 [ $(\text{M}+\text{H})^+$ ]; calcd for  $\text{C}_{20}\text{H}_{25}\text{O}_5$ : 345.1702].

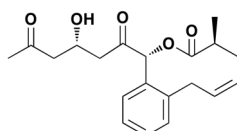

(-)-31h

**Compounds (-)-31h.**  $[\alpha]_D^{20}$  -76.3 (c 0.58  $\text{CDCl}_3$ ); IR (film) 3406 (m), 2922 (m), 1720 (s), 1381 (m), 1182 (s), 1095 (s), 762 (m)  $\text{cm}^{-1}$ ;  $^1\text{H}$  NMR (500 MHz,  $\text{CDCl}_3$ )  $\delta$  7.31-7.27 (m, 2H), 7.23-7.20 (m, 2H), 6.06 (s, 1H), 5.53-5.48 (m, 1H), 5.46 (td,  $J = 10.2$  and  $6.4$  Hz, 1H), 4.48-4.43 (m, 1H), 4.00 (t,  $J = 11.3$  Hz, 1H), 3.29 (br, 1H), 3.21-3.17 (m, 1H), 2.97-2.86 (m, 2H), 2.82 (dd,  $J = 17.3$  and  $5.3$  Hz, 1H), 2.73 (dd,  $J = 17.4$  and  $6.8$  Hz, 1H), 2.67-2.58 (m, 2H), 2.15 (s, 3H), 2.10-2.05 (m, 1H), 1.14 (d,  $J = 7.1$  Hz, 3H);  $^{13}\text{C}$  NMR (125 MHz,  $\text{CDCl}_3$ )  $\delta$ 208.4, 203.7, 173.4, 139.5, 133.5, 132.1, 131.0, 130.2, 129.3, 126.5, 123.1, 82.0, 63.8, 48.8, 44.9, 38.3, 32.5, 30.7, 29.8, 14.0; high resolution mass spectrum ( $\text{ES}^+$ )  $m/z$  367.1518 [ $(\text{M}+\text{Na})^+$ ]; calcd for  $\text{C}_{20}\text{H}_{24}\text{O}_5\text{Na}$ : 367.1521].

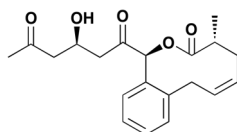

(+)-31i

**Compounds (+)-31i.**  $[\alpha]_D^{20}$  +99.6 (c 0.57  $\text{CDCl}_3$ ); IR (film) 3406 (m), 2922 (m), 1720 (s), 1381 (m), 1182 (s), 1095 (s), 762 (m)  $\text{cm}^{-1}$ ;  $^1\text{H}$  NMR (500 MHz,  $\text{CDCl}_3$ )  $\delta$  7.31-7.27 (m, 2H), 7.23-7.20 (m, 2H), 6.06 (s, 1H), 5.53-5.48 (m, 1H), 5.46 (td,  $J = 10.2$  and  $6.4$  Hz, 1H), 4.48-4.43 (m, 1H), 4.00 (t,  $J = 11.3$  Hz, 1H), 3.29 (br, 1H), 3.21-3.17 (m, 1H), 2.97-2.86 (m, 2H), 2.82 (dd,  $J = 17.3$  and  $5.3$  Hz, 1H), 2.73 (dd,  $J = 17.4$  and  $6.8$  Hz, 1H), 2.67-2.58 (m, 2H), 2.15 (s, 3H), 2.10-2.05 (m, 1H), 1.14 (d,  $J = 7.1$  Hz, 3H);  $^{13}\text{C}$  NMR (125 MHz,  $\text{CDCl}_3$ )  $\delta$ 208.4, 203.7, 173.4, 139.5, 133.5, 132.1, 131.0, 130.2, 129.3,

126.5, 123.1, 82.0, 63.8, 48.8, 44.9, 38.3, 32.5, 30.7, 29.8, 14.0; high resolution mass spectrum (ES<sup>+</sup>) m/z 367.1518 [(M+Na)<sup>+</sup>; calcd for C<sub>20</sub>H<sub>24</sub>O<sub>5</sub>Na: 367.1521].

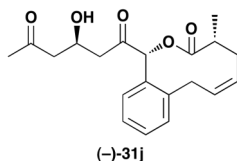

**Compounds (-)-31j.** [ $\alpha$ ]<sub>D</sub><sup>20</sup> -193.6 (c 0.38 CDCl<sub>3</sub>); IR (film) 3420 (m), 2922 (m), 1717 (s), 1375 (m), 1242 (s), 1084 (s), 761 (m) cm<sup>-1</sup>; <sup>1</sup>H NMR (500 MHz, CDCl<sub>3</sub>)  $\delta$  7.34 (d,  $J$  = 7.4 Hz, 1H), 7.30-7.26 (m, 1H), 7.23-7.20 (m, 2H), 6.04 (s, 1H), 5.47-5.42 (m, 1H), 5.40 (td,  $J$  = 10.8 and 6.1 Hz, 1H), 4.47-4.42 (m, 1H), 4.10 (t,  $J$  = 11.9 Hz, 1H), 3.37 (br, 1H), 3.04-2.97 (m, 1H), 2.89-2.83 (m, 2H), 2.61 (dd,  $J$  = 17.1 and 5.1 Hz, 1H), 2.55-2.52 (m, 2H), 2.51-2.44 (m, 1H), 2.12 (s, 3H), 1.99-1.94 (m, 1H), 1.33 (d,  $J$  = 7.1 Hz, 3H); <sup>13</sup>C NMR (125 MHz, CDCl<sub>3</sub>)  $\delta$  208.3, 203.0, 173.3, 139.8, 132.4, 132.3, 130.9, 130.5, 129.2, 126.4, 125.4, 82.0, 64.1, 48.9, 44.8, 40.6, 32.6, 31.7, 30.6, 17.9; high resolution mass spectrum (ES<sup>+</sup>) m/z 345.1697 [(M+H)<sup>+</sup>; calcd for C<sub>20</sub>H<sub>25</sub>O<sub>5</sub>: 345.1702].

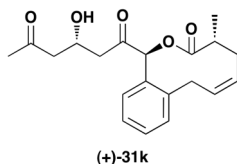

**Compounds (+)-31k.** [ $\alpha$ ]<sub>D</sub><sup>20</sup> +92.7 (c 0.29 CDCl<sub>3</sub>); IR (film) 3439 (m), 2922 (s), 2853 (m), 1715 (s), 1362 (m), 1184 (s), 1094 (m), 741 (m) cm<sup>-1</sup>; <sup>1</sup>H NMR (500 MHz, CDCl<sub>3</sub>)  $\delta$  7.31-7.26 (m, 2H), 7.23-7.20 (m, 2H), 6.05 (s, 1H), 5.52-5.47 (m, 1H), 5.45 (td,  $J$  = 10.1 and 6.3 Hz, 1H), 4.48-4.42 (m, 1H), 4.01 (t,  $J$  = 11.3 Hz, 1H), 3.36 (br, 1H), 3.24-3.18 (m, 1H), 2.95-2.87 (m, 2H), 2.84 (dd,  $J$  = 17.1 and 7.6 Hz, 1H), 2.62 (dd,  $J$  = 17.1 and 4.9 Hz, 1H), 2.55-2.51 (m, 2H), 2.12 (s, 3H), 2.09-2.04 (m, 1H), 1.13 (d,  $J$  = 7.1 Hz, 3H); <sup>13</sup>C NMR (125 MHz, CDCl<sub>3</sub>)  $\delta$  208.3, 203.5, 173.4, 139.6, 133.5, 132.1, 130.9, 130.4, 129.2, 126.5, 123.2, 82.1, 64.1, 48.9, 45.0, 38.3, 32.4, 30.7, 29.8, 13.9; high resolution mass spectrum (ES<sup>+</sup>) m/z 367.1519 [(M+Na)<sup>+</sup>; calcd for C<sub>20</sub>H<sub>24</sub>O<sub>5</sub>Na: 367.1521].

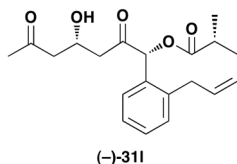



**Compounds (-)-31l.**  $[\alpha]_D^{20} -131.3$  (c 0.51  $\text{CDCl}_3$ ); IR (film) 3447 (m), 2925 (s), 2857 (m), 1719 (s), 1373 (m), 1242 (s), 1081 (s), 759 (m)  $\text{cm}^{-1}$ ;  $^1\text{H}$  NMR (500 MHz,  $\text{CDCl}_3$ )  $\delta$  7.33 (d,  $J = 7.3$  Hz, 1H), 7.30-7.26 (m, 1H), 7.24-7.21 (m, 2H), 6.04 (s, 1H), 5.51-5.44 (m, 1H), 5.40 (td,  $J = 10.7$  and 6.1 Hz, 1H), 4.47-4.41 (m, 1H), 4.10 (t,  $J = 11.9$  Hz, 1H), 3.28 (d,  $J = 4.0$  Hz, 1H), 3.04-2.97 (m, 1H), 2.90-2.86 (m, 1H), 2.82 (dd,  $J = 17.4$  and 5.4 Hz, 1H), 2.71 (dd,  $J = 17.4$  and 6.8 Hz, 1H), 2.67-2.58 (m, 2H), 2.55-2.43 (m, 1H), 2.14 (s, 3H), 1.99-1.95 (m, 1H), 1.33 (d,  $J = 7.1$  Hz, 3H);  $^{13}\text{C}$  NMR (125 MHz,  $\text{CDCl}_3$ )  $\delta$  208.4, 203.2, 173.4, 139.8, 132.5, 132.4, 131.0, 130.4, 129.3, 126.5, 125.4, 82.0, 63.9, 48.8, 44.7, 40.5, 32.7, 31.8, 30.7, 17.9; high resolution mass spectrum ( $\text{ES}^+$ )  $m/z$  345.1718  $[(\text{M}+\text{H})^+]$ ; calcd for  $\text{C}_{20}\text{H}_{25}\text{O}_5$ : 345.1702].

**General procedure for catalytic hydrogenation reactions (31m-31x):** To a solution of **31a** (12.2 mg, 0.037 mmol, 1.0 equiv.) in EtOH (1.85 mL) was added  $\text{PtO}_2$  (0.34 mg, 0.001 mmol, 0.04 equiv.). After being stirred under an atmosphere of hydrogen for 1 h at room temperature, the reaction mixture was filtered through celite and concentrated *in vacuo*. Flash chromatography (ethyl acetate/hexane = 1/1) afforded **31m** (11.8 mg, 0.035 mmol, 96%) as a pale yellow oil.  $R_f$  0.1 (hexane/ethyl acetate = 2/1).

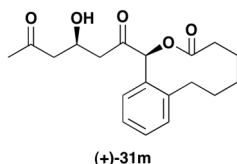

**Compounds (+)-31m.** 96% yield.  $[\alpha]_D^{20} +30.0$  (c 0.69  $\text{CDCl}_3$ ); IR (film) 3448 (m), 2920 (s), 2864 (m), 1721 (s), 1328 (m), 1238 (s), 1052 (s), 758 (m)  $\text{cm}^{-1}$ ;  $^1\text{H}$  NMR (500 MHz,  $\text{CDCl}_3$ )  $\delta$  7.33-7.26 (m, 2H), 7.22-7.17 (m, 2H), 6.16 (s, 1H), 4.46-4.42 (m, 1H), 3.06-3.01 (m, 1H), 2.76 (dd,  $J = 17.4$  and 5.1 Hz, 1H), 2.68-2.58 (m, 4H), 2.57-2.51 (m, 1H), 2.44-2.39 (m, 1H), 2.25-2.18 (m, 1H), 2.14 (s, 3H), 2.07-2.00 (m, 1H), 1.77-1.69 (m, 2H), 1.63-1.50 (m, 2H), 0.76-0.79 (m, 1H);  $^{13}\text{C}$  NMR (125 MHz,  $\text{CDCl}_3$ )  $\delta$  208.3, 203.9, 171.6, 141.7, 132.5, 131.4, 130.9, 129.3, 126.2, 81.8, 63.8, 48.9, 44.9, 35.1, 30.9, 30.7, 28.6, 24.1, 21.8; high resolution mass spectrum ( $\text{ES}^+$ )  $m/z$  355.1519  $[(\text{M}+\text{Na})^+]$ ; calcd for  $\text{C}_{19}\text{H}_{24}\text{O}_5\text{Na}$ : 355.1521].

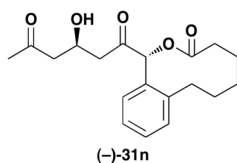

**Compounds (-)-31n.** 97% yield.  $[\alpha]_D^{20} -42.5$  (c 0.63  $\text{CDCl}_3$ ); IR (film) 3420 (m), 2920 (s), 2853 (m), 1721 (s), 1363 (m), 1239 (s), 1053 (s), 755 (m)  $\text{cm}^{-1}$ ;  $^1\text{H}$  NMR (500 MHz,  $\text{CDCl}_3$ )  $\delta$  7.34 (d,  $J = 7.4$  Hz, 1H), 7.30-7.26 (m, 1H), 7.22-7.17 (m, 2H), 6.16 (s, 1H), 4.47-4.42 (m, 1H), 3.08-3.01 (m, 1H), 2.80 (dd,  $J = 17.3$  and 7.6 Hz, 1H), 2.68-2.60 (m, 2H), 2.59-2.48 (m, 3H), 2.43-2.38 (m, 1H), 2.25-2.18 (m, 1H), 2.12 (s, 3H), 2.08-2.00 (m, 1H), 1.78-1.69 (m, 2H), 1.63-1.48 (m, 2H), 0.74-0.69 (m, 1H);  $^{13}\text{C}$  NMR (125 MHz,  $\text{CDCl}_3$ )  $\delta$  208.3, 203.7, 171.6, 141.7, 132.5, 131.4, 131.0, 129.2, 126.2, 82.0, 64.0, 48.9, 45.0, 35.1, 30.9, 30.7, 28.6, 24.0, 21.8; high resolution mass spectrum ( $\text{ES}^+$ )  $m/z$  355.1522  $[(\text{M}+\text{Na})^+]$ ; calcd for  $\text{C}_{19}\text{H}_{24}\text{O}_5\text{Na}$ : 355.1521].

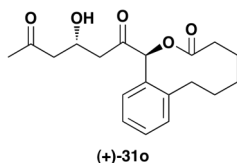

**Compounds (+)-31o.** 96% yield.  $[\alpha]_D^{20} +99.1$  (c 0.60  $\text{CDCl}_3$ ); IR (film) 3420 (m), 2920 (s), 2853 (m), 1721 (s), 1363 (m), 1239 (s), 1053 (s), 755 (m)  $\text{cm}^{-1}$ ;  $^1\text{H}$  NMR (500 MHz,  $\text{CDCl}_3$ )  $\delta$  7.34 (d,  $J = 7.4$  Hz, 1H), 7.30-7.26 (m, 1H), 7.22-7.17 (m, 2H), 6.16 (s, 1H), 4.47-4.42 (m, 1H), 3.08-3.01 (m, 1H), 2.80 (dd,  $J = 17.3$  and 7.6 Hz, 1H), 2.68-2.60 (m, 2H), 2.59-2.48 (m, 3H), 2.43-2.38 (m, 1H), 2.25-2.18 (m, 1H), 2.12 (s, 3H), 2.08-2.00 (m, 1H), 1.78-1.69 (m, 2H), 1.63-1.48 (m, 2H), 0.74-0.69 (m, 1H);  $^{13}\text{C}$  NMR (125 MHz,  $\text{CDCl}_3$ )  $\delta$  208.3, 203.7, 171.6, 141.7, 132.5, 131.4, 131.0, 129.2, 126.2, 82.0, 64.0, 48.9, 45.0, 35.1, 30.9, 30.7, 28.6, 24.0, 21.8; high resolution mass spectrum ( $\text{ES}^+$ )  $m/z$  355.1522  $[(\text{M}+\text{Na})^+]$ ; calcd for  $\text{C}_{19}\text{H}_{24}\text{O}_5\text{Na}$ : 355.1521].

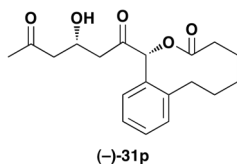

**Compounds (-)-31p.** 95% yield.  $[\alpha]_D^{20} -83.3$  (c 1.30  $\text{CDCl}_3$ ); IR (film) 3448 (m), 2920 (s), 2864 (m), 1721 (s), 1328 (m), 1238 (s), 1052 (s), 758 (m)  $\text{cm}^{-1}$ ;  $^1\text{H}$  NMR (500 MHz,  $\text{CDCl}_3$ )  $\delta$  7.33-7.26 (m, 2H), 7.22-7.17 (m, 2H), 6.16 (s, 1H), 4.46-4.42 (m, 1H), 3.06-

3.01 (m, 1H), 2.76 (dd,  $J = 17.4$  and  $5.1$  Hz, 1H), 2.68-2.58 (m, 4H), 2.57-2.51 (m, 1H), 2.44-2.39 (m, 1H), 2.25-2.18 (m, 1H), 2.14 (s, 3H), 2.07-2.00 (m, 1H), 1.77-1.69 (m, 2H), 1.63-1.50 (m, 2H), 0.76-0.79 (m, 1H);  $^{13}\text{C}$  NMR (125 MHz,  $\text{CDCl}_3$ )  $\delta$ 208.3, 203.9, 171.6, 141.7, 132.5, 131.4, 130.9, 129.3, 126.2, 81.8, 63.8, 48.9, 44.9, 35.1, 30.9, 30.7, 28.6, 24.1, 21.8; high resolution mass spectrum ( $\text{ES}^+$ )  $m/z$  355.1519  $[(\text{M}+\text{Na})^+]$ ; calcd for  $\text{C}_{19}\text{H}_{24}\text{O}_5\text{Na}$ : 355.1521].

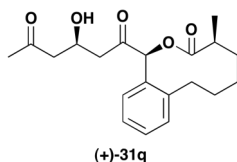

**Compounds (+)-31q.** 96% yield.  $[\alpha]_{\text{D}}^{20} +138.8$  (c 1.02  $\text{CDCl}_3$ ); IR (film) 3478 (m), 2927 (s), 2867 (m), 1723 (s), 1366 (m), 1249 (s), 1058 (s), 760 (m)  $\text{cm}^{-1}$ ;  $^1\text{H}$  NMR (500 MHz,  $\text{CDCl}_3$ )  $\delta$  7.33 (d,  $J = 7.6$  Hz, 1H), 7.30-7.26 (m, 1H), 7.22-7.17 (m, 2H), 6.05 (s, 1H), 4.45-4.41 (m, 1H), 3.05-2.99 (m, 1H), 2.76 (dd,  $J = 14.3$  and  $5.3$  Hz, 1H), 2.65-2.60 (m, 3H), 2.44-2.38 (m, 2H), 2.14 (s, 3H), 1.86-1.52 (m, 6H), 1.28 (d,  $J = 7.1$  Hz, 3H), 0.63-0.57 (m, 1H);  $^{13}\text{C}$  NMR (125 MHz,  $\text{CDCl}_3$ )  $\delta$ 208.3, 203.9, 174.4, 141.4, 132.9, 131.4, 131.2, 129.2, 126.2, 81.7, 63.9, 48.9, 44.8, 42.1, 31.14, 31.12, 30.7, 28.4, 23.0, 18.2; high resolution mass spectrum ( $\text{ES}^+$ )  $m/z$  369.1692  $[(\text{M}+\text{Na})^+]$ ; calcd for  $\text{C}_{20}\text{H}_{26}\text{O}_5\text{Na}$ : 369.1678].

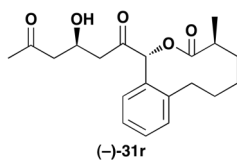

**Compounds (-)-31r.** 97% yield.  $[\alpha]_{\text{D}}^{20} -73.4$  (c 0.79  $\text{CDCl}_3$ ); IR (film) 3456 (m), 2924 (s), 2867 (m), 1724 (s), 1362 (m), 1262 (m), 1164 (s), 1066 (m), 758 (m)  $\text{cm}^{-1}$ ;  $^1\text{H}$  NMR (500 MHz,  $\text{CDCl}_3$ )  $\delta$  7.33-7.28 (m, 2H), 7.22-7.18 (m, 2H), 6.11 (s, 1H), 4.48-4.44 (m, 1H), 3.29 (d,  $J = 3.7$  Hz, 1H), 3.01-2.96 (m, 1H), 2.87-2.82 (m, 1H), 2.79 (dd,  $J = 17.1$  and  $7.7$  Hz, 1H), 2.59-2.49 (m, 3H), 2.43-2.39 (m, 1H), 2.19-2.15 (m, 1H), 2.13 (s, 3H), 1.72-1.48 (m, 4H), 1.04 (d,  $J = 7.1$  Hz, 3H), 0.58-0.52 (m, 1H);  $^{13}\text{C}$  NMR (125 MHz,  $\text{CDCl}_3$ )  $\delta$ 208.3, 204.0, 174.6, 141.5, 133.0, 131.3, 131.2, 129.3, 126.3, 82.1, 64.1, 48.9, 45.2, 38.7, 31.1, 30.7, 29.7, 28.1, 20.4, 14.4; high resolution mass spectrum ( $\text{ES}^-$ )  $m/z$  381.1472  $[(\text{M}+\text{Cl})^-]$ ; calcd for  $\text{C}_{20}\text{H}_{26}\text{O}_5\text{Cl}$ : 381.1469].

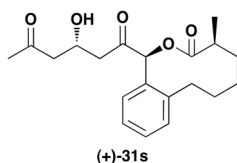

**Compounds (+)-31s.** 95% yield.  $[\alpha]_D^{20} +67.8$  (c 0.87  $\text{CDCl}_3$ ); IR (film) 3450 (m), 2925 (s), 2856 (m), 1722 (s), 1376 (m), 1251 (s), 1162 (s), 1065 (s), 758 (m)  $\text{cm}^{-1}$ ;  $^1\text{H}$  NMR (500 MHz,  $\text{CDCl}_3$ )  $\delta$  7.35 (d,  $J = 7.3$  Hz, 1H), 7.30-7.26 (m, 1H), 7.22-7.18 (m, 2H), 6.09 (s, 1H), 4.48-4.42 (m, 1H), 3.28 (br, 1H), 3.07-3.01 (m, 1H), 2.80 (dd,  $J = 17.3$  and 7.4 Hz, 1H), 2.59-2.49 (m, 3H), 2.43-2.40 (m, 2H), 2.13 (s, 3H), 1.86-1.53 (m, 5H), 1.28 (d,  $J = 7.1$  Hz, 3H), 0.63-0.54 (m, 1H);  $^{13}\text{C}$  NMR (125 MHz,  $\text{CDCl}_3$ )  $\delta$  208.4, 203.6, 174.4, 141.5, 132.9, 131.4, 131.3, 129.2, 126.2, 81.9, 64.0, 48.9, 45.0, 42.2, 31.2, 30.7, 29.7, 28.3, 22.9, 18.2; high resolution mass spectrum ( $\text{ES}^-$ )  $m/z$  381.1474  $[(\text{M}+\text{Cl})^-]$ ; calcd for  $\text{C}_{20}\text{H}_{26}\text{O}_5\text{Cl}$ : 381.1469].

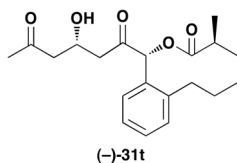

**Compounds (-)-31t.** 97% yield.  $[\alpha]_D^{20} -57.9$  (c 0.83  $\text{CDCl}_3$ ); IR (film) 3441 (m), 3011 (m), 2922 (m), 2858 (m), 1720 (s), 1359 (m), 1242 (s), 1066 (s), 745 (m)  $\text{cm}^{-1}$ ;  $^1\text{H}$  NMR (500 MHz,  $\text{CDCl}_3$ )  $\delta$  7.32-7.28 (m, 2H), 7.22-7.18 (m, 2H), 6.11 (s, 1H), 4.47-4.42 (m, 1H), 3.26 (d,  $J = 3.3$  Hz, 1H), 2.99-2.94 (m, 1H), 2.87-2.79 (m, 1H), 2.75 (dd,  $J = 17.4$  and 5.2 Hz, 1H), 2.66-2.57 (m, 3H), 2.44-2.40 (m, 1H), 2.15 (s, 3H), 1.70-1.43 (m, 5H), 1.04 (d,  $J = 7.1$  Hz, 3H), 0.61-0.54 (m, 1H);  $^{13}\text{C}$  NMR (125 MHz,  $\text{CDCl}_3$ )  $\delta$  208.3, 204.2, 174.6, 141.4, 133.0, 131.3, 131.0, 129.3, 126.3, 81.9, 63.9, 48.9, 45.1, 38.7, 31.1, 30.7, 29.8, 28.2, 20.5, 14.4; high resolution mass spectrum ( $\text{ES}^-$ )  $m/z$  381.1472  $[(\text{M}+\text{Cl})^-]$ ; calcd for  $\text{C}_{20}\text{H}_{26}\text{O}_5\text{Cl}$ : 381.1469].

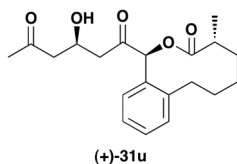

**Compounds (+)-31u.** 96% yield.  $[\alpha]_D^{20} +82.6$  (c 0.56  $\text{CDCl}_3$ ); IR (film) 3441 (m), 3011 (m), 2922 (m), 2858 (m), 1720 (s), 1359 (m), 1242 (s), 1066 (s), 745 (m)  $\text{cm}^{-1}$ ;  $^1\text{H}$  NMR (500 MHz,  $\text{CDCl}_3$ )  $\delta$  7.32-7.28 (m, 2H), 7.22-7.18 (m, 2H), 6.11 (s, 1H), 4.47-4.42 (m,

1H), 3.26 (d,  $J = 3.3$  Hz, 1H), 2.99-2.94 (m, 1H), 2.87-2.79 (m, 1H), 2.75 (dd,  $J = 17.4$  and  $5.2$  Hz, 1H), 2.66-2.57 (m, 3H), 2.44-2.40 (m, 1H), 2.15 (s, 3H), 1.70-1.43 (m, 5H), 1.04 (d,  $J = 7.1$  Hz, 3H), 0.61-0.54 (m, 1H);  $^{13}\text{C}$  NMR (125 MHz,  $\text{CDCl}_3$ )  $\delta$ 208.3, 204.2, 174.6, 141.4, 133.0, 131.3, 131.0, 129.3, 126.3, 81.9, 63.9, 48.9, 45.1, 38.7, 31.1, 30.7, 29.8, 28.2, 20.5, 14.4; high resolution mass spectrum ( $\text{ES}^-$ )  $m/z$  381.1472 [(M+Cl) $^-$ ]; calcd for  $\text{C}_{20}\text{H}_{26}\text{O}_5\text{Cl}$ : 381.1469].

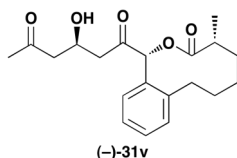

**Compounds (-)-31v.** 96% yield.  $[\alpha]_D^{20}$  -104.7 (c 0.60  $\text{CDCl}_3$ ); IR (film) 3441 (m), 2925 (s), 2856 (m), 1722 (s), 1367 (m), 1173 (s), 1109 (s), 757 (m)  $\text{cm}^{-1}$ ;  $^1\text{H}$  NMR (500 MHz,  $\text{CDCl}_3$ )  $\delta$  7.35 (d,  $J = 7.3$  Hz, 1H), 7.30-7.26 (m, 1H), 7.22-7.18 (m, 2H), 6.09 (s, 1H), 4.48-4.42 (m, 1H), 3.28 (br, 1H), 3.07-3.01 (m, 1H), 2.80 (dd,  $J = 17.3$  and  $7.4$  Hz, 1H), 2.59-2.49 (m, 3H), 2.43-2.40 (m, 2H), 2.13 (s, 3H), 1.86-1.53 (m, 5H), 1.28 (d,  $J = 7.1$  Hz, 3H), 0.63-0.54 (m, 1H);  $^{13}\text{C}$  NMR (125 MHz,  $\text{CDCl}_3$ )  $\delta$ 208.4, 203.6, 174.4, 141.5, 132.9, 131.4, 131.3, 129.2, 126.2, 81.9, 64.0, 48.9, 45.0, 42.2, 31.2, 30.7, 29.7, 28.3, 22.9, 18.2; high resolution mass spectrum ( $\text{ES}^+$ )  $m/z$  369.1691 [(M+Na) $^+$ ]; calcd for  $\text{C}_{20}\text{H}_{26}\text{O}_5\text{Na}$ : 369.1678].

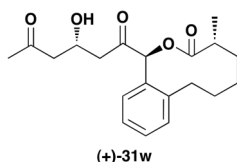

**Compounds (+)-31w.** 95% yield.  $[\alpha]_D^{20}$  +85.1 (c 1.19  $\text{CDCl}_3$ ); IR (film) 3456 (m), 2924 (s), 2867 (m), 1724 (s), 1362 (m), 1262 (m), 1164 (s), 1066 (m), 758 (m)  $\text{cm}^{-1}$ ;  $^1\text{H}$  NMR (500 MHz,  $\text{CDCl}_3$ )  $\delta$  7.33-7.28 (m, 2H), 7.22-7.18 (m, 2H), 6.11 (s, 1H), 4.48-4.44 (m, 1H), 3.29 (d,  $J = 3.7$  Hz, 1H), 3.01-2.96 (m, 1H), 2.87-2.82 (m, 1H), 2.79 (dd,  $J = 17.1$  and  $7.7$  Hz, 1H), 2.59-2.49 (m, 3H), 2.43-2.39 (m, 1H), 2.19-2.15 (m, 1H), 2.13 (s, 3H), 1.72-1.48 (m, 4H), 1.04 (d,  $J = 7.1$  Hz, 3H), 0.58-0.52 (m, 1H);  $^{13}\text{C}$  NMR (125 MHz,  $\text{CDCl}_3$ )  $\delta$ 208.3, 204.0, 174.6, 141.5, 133.0, 131.3, 131.2, 129.3, 126.3, 82.1, 64.1, 48.9, 45.2, 38.7, 31.1, 30.7, 29.7, 28.1, 20.4, 14.4; high resolution mass spectrum ( $\text{ES}^-$ )  $m/z$  381.1472 [(M+Cl) $^-$ ]; calcd for  $\text{C}_{20}\text{H}_{26}\text{O}_5\text{Cl}$ : 381.1469].

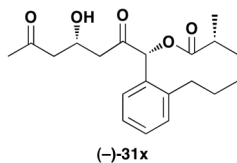

**Compounds (-)-31x.** 97 % yield.  $[\alpha]_D^{20} -96.8$  (c 0.96  $\text{CDCl}_3$ ); IR (film) 3478 (m), 2927 (s), 2867 (m), 1723 (s), 1366 (m), 1249 (s), 1058 (s), 760 (m)  $\text{cm}^{-1}$ ;  $^1\text{H}$  NMR (500 MHz,  $\text{CDCl}_3$ )  $\delta$  7.33 (d,  $J = 7.6$  Hz, 1H), 7.30-7.26 (m, 1H), 7.22-7.17 (m, 2H), 6.05 (s, 1H), 4.45-4.41 (m, 1H), 3.05-2.99 (m, 1H), 2.76 (dd,  $J = 14.3$  and 5.3 Hz, 1H), 2.65-2.60 (m, 3H), 2.44-2.38 (m, 2H), 2.14 (s, 3H), 1.86-1.52 (m, 6H), 1.28 (d,  $J = 7.1$  Hz, 3H), 0.63-0.57 (m, 1H);  $^{13}\text{C}$  NMR (125 MHz,  $\text{CDCl}_3$ )  $\delta$  208.3, 203.9, 174.4, 141.4, 132.9, 131.4, 131.2, 129.2, 126.2, 81.7, 63.9, 48.9, 44.8, 42.1, 31.14, 31.12, 30.7, 28.4, 23.0, 18.2; high resolution mass spectrum ( $\text{ES}^+$ )  $m/z$  369.1692  $[(\text{M}+\text{Na})^+]$ ; calcd for  $\text{C}_{20}\text{H}_{26}\text{O}_5\text{Na}$ : 369.1678].

### Linchpin Synthesis and Validation for the Type II ARC Protocol

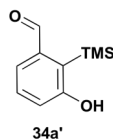

**Compound 34a'.** To a solution of NaH (547.2 mg, 22.8 mmol, 1.2 equiv.) in THF (85 mL) at 0 °C was added compound **37** (5.22 g, 19.0 mmol, 1.0 equiv.) in THF (10 mL). After being stirred for 1 h at 0 °C, *n*-BuLi (2.5 M, 9.12 mL, 22.8 mmol, 1.2 equiv.) was added. After stirring 40 min at 0 °C, TMSCl (7.43 g, 68.4 mmol, 3 equiv.) was then added. After the addition was complete, the reaction mixture was warmed to room temperature over 2 h. After being stirred for 2 h, 95 mL of 5 % aqueous HCl was added. A saturated aqueous  $\text{NaHCO}_3$  (50 mL) solution was added after 12 h, and the resulting mixture extracted with  $\text{Et}_2\text{O}$  (50 mL x 3). The combined organic layers were washed with brine, dried over  $\text{MgSO}_4$ , filtered and concentrated *in vacuo*. Flash chromatography (ethyl acetate/hexane = 1/15) afforded **34a'** (3.03 g, 15.6 mmol, 82% yield) as a pale yellow solid.  $R_f$  0.2 (hexane/diethyl ether = 10/1); mp: 151-154 °C; IR (film) 3202 (s), 2961 (m), 2813 (w), 1924 (w), 1665 (s), 1583 (s), 1287 (s), 841 (s)  $\text{cm}^{-1}$ ;  $^1\text{H}$  NMR (500 MHz,  $\text{CDCl}_3$ )  $\delta$  10.21 (s, 1H), 7.50 (dd,  $J = 7.5$  and 1.0 Hz, 1H), 7.37 (t,  $J = 7.5$  Hz, 1H),

6.96 (dd,  $J = 8.0$  and  $1.0$  Hz, 1H), 5.57 (s, 1H), 0.44 (s, 9H);  $^{13}\text{C}$  NMR (125 MHz,  $\text{CDCl}_3$ )  $\delta$  193.8, 161.5, 143.6, 130.7, 126.3, 123.8, 121.0, 2.4; high resolution mass spectrum ( $\text{Cl}^+$ )  $m/z$  179.0520 [ $(\text{M}-\text{CH}_3)^+$ ; calcd for  $\text{C}_9\text{H}_{11}\text{O}_2\text{Si}$ : 179.0528].

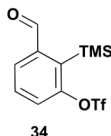

**Compound 34.** To a solution of the resulting alcohol **34a'** (1.29 g, 6.63 mmol, 1.0 equiv.) in  $\text{CH}_2\text{Cl}_2$  (67 mL) at  $0^\circ\text{C}$  were added pyridine (1.57 g, 19.9 mmol, 3.0 equiv.) and  $\text{Tf}_2\text{O}$  (2.81 g, 9.94 mmol, 1.5 equiv.) dropwise. After being stirred for 20 min at room temperature, a saturated aqueous  $\text{NH}_4\text{Cl}$  (5 mL) solution and 1N HCl (5 mL) were added, and the resulting mixture extracted with  $\text{CH}_2\text{Cl}_2$  (15 mL x 3). The combined organic layers were washed with brine, dried over  $\text{MgSO}_4$ , filtered and concentrated *in vacuo*. Flash chromatography (ethyl acetate/hexane = 1/100) afforded **34** (1.88 g, 5.76 mmol, 87% yield) as a pale yellow solid.  $R_f$  0.7 (hexane/ethyl acetate = 10/1); IR (film) 3086 (w), 2959 (m), 2903 (m), 2743 (w), 1959 (w), 1707 (s), 1421 (s), 1216 (s), 1145 (s), 844 (s)  $\text{cm}^{-1}$ ;  $^1\text{H}$  NMR (500 MHz,  $\text{CDCl}_3$ )  $\delta$  10.29 (s, 1H), 7.93 (dd,  $J = 7.5$  and  $1.0$  Hz, 1H), 7.60 (t,  $J = 7.5$  Hz, 1H), 7.52 (dd,  $J = 7.5$  and  $1.0$  Hz, 1H), 0.48 (s, 9H);  $^{13}\text{C}$  NMR (125 MHz,  $\text{CDCl}_3$ )  $\delta$  191.5, 155.0, 144.4, 135.9, 131.2, 130.0, 125.7, 120.2 (q,  $J = 318.6$  Hz,  $\text{CF}_3$ ), 2.2; high resolution mass spectrum ( $\text{ES}^+$ )  $m/z$  349.0160 [ $(\text{M}+\text{Na})^+$ ; calcd for  $\text{C}_{11}\text{H}_{13}\text{F}_3\text{O}_4\text{SSiNa}$ : 349.0154].

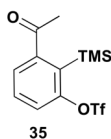

**Compound 35.** To a solution of **38** (485.6 mg, 1.42 mmol, 1.0 equiv.) in  $\text{CH}_2\text{Cl}_2$  was added PCC (459.1 mg, 2.13 mmol, 1.5 equiv.). After being stirred for 6 h at room temperature, the reaction mixture was filtered through silica gel and concentrated *in vacuo*. Flash chromatography (diethyl ether/hexane = 1/20) afforded **35** (416.2 mg, 1.22 mmol, 86% yield) as a colorless oil.  $R_f$  0.6 (hexane/ethyl acetate = 10/1); IR (film) 2995 (m), 2955 (m), 2905 (m), 1952 (w), 1696 (s), 1592 (m), 1420 (s), 1214 (s), 901 (s)  $\text{cm}^{-1}$ ;  $^1\text{H}$  NMR (500 MHz,  $\text{CDCl}_3$ )  $\delta$  7.59 (d,  $J = 7.0$  Hz, 1H), 7.49 (t,  $J = 7.5$  Hz, 1H), 7.40 (d,  $J = 8.0$  Hz, 1H), 2.62 (s, 3H), 0.37 (s, 9H);  $^{13}\text{C}$  NMR (125 MHz,  $\text{CDCl}_3$ )  $\delta$  201.8, 155.5,

149.6, 133.7, 130.7, 126.7, 123.0, 118.5 (q,  $J = 318.3$  Hz,  $\text{CF}_3$ ), 29.1, 1.6; high resolution mass spectrum ( $\text{ES}^+$ )  $m/z$  363.0295 [ $(\text{M}+\text{Na})^+$ ; calcd for  $\text{C}_{12}\text{H}_{15}\text{F}_3\text{O}_4\text{SSiNa}$ : 363.0310].

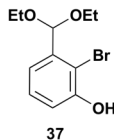

**Compound 37.** To a solution of 2-bromo-3-hydroxy benzaldehyde **36** (5.74 g, 28.5 mmol, 1.0 equiv.) in EtOH (47 mL) at room temperature were added TABCO (1.17 g, 2.85 mmol, 0.1 equiv.) and  $(\text{EtO})_3\text{CH}$  (21.1g, 142.5 mmol, 5.0 equiv.). After being stirred for 30 min at 40 °C, a saturated aqueous  $\text{NaHCO}_3$  (30 mL) solution was added, and the resulting mixture extracted with  $\text{CH}_2\text{Cl}_2$  (50 mL x 3). The combined organic layers were washed with brine, dried over  $\text{MgSO}_4$ , filtered and concentrated *in vacuo*. Flash chromatography (ethyl acetate/hexane = 1/30) on triethylamine-buffered silica gel (2.5 v/v) afforded **37** (7.22 g, 26.2 mmol, 92% yield) as a pale yellow oil.  $R_f$  0.4 (hexane/diethyl ether = 10/1); IR (film) 3358 (m), 2977 (s), 2928 (s), 2887 (s), 1936 (w), 1462 (s), 1294 (s), 783 (s)  $\text{cm}^{-1}$ ;  $^1\text{H}$  NMR (500 MHz,  $\text{CDCl}_3$ )  $\delta$  7.20-7.18 (m, 2H), 6.98 (t,  $J = 5.0$  Hz, 1H), 6.31 (br, 1H), 5.61 (s, 1H), 3.69-3.63 (m, 2H), 3.61-3.55 (m, 2H), 1.24 (t,  $J = 7.0$  Hz, 6H);  $^{13}\text{C}$  NMR (125 MHz,  $\text{CDCl}_3$ )  $\delta$  152.9, 138.6, 128.3, 119.9, 116.3, 111.3, 101.5, 62.5, 15.3; high resolution mass spectrum ( $\text{CI}^+$ )  $m/z$  274.0196 [ $(\text{M})^+$ ; calcd for  $\text{C}_{11}\text{H}_{15}\text{O}_3\text{Br}$ : 274.0205].

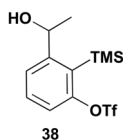

**Compound 38.** To a solution of **34** (747.7 mg, 2.29 mmol, 1.0 equiv.) in  $\text{Et}_2\text{O}$  (11.5 mL) at 0 °C was added  $\text{MeMgBr}$  (3.0 M in diethyl ether, 0.92 mL, 2.75 mmol, 1.2 equiv.) dropwise. After stirring for 5 min at 0 °C, a saturated aqueous  $\text{NH}_4\text{Cl}$  (10 mL) solution was added, and the resulting mixture extracted with  $\text{Et}_2\text{O}$  (10 mL x 3). The combined organic layers were washed with brine, dried over  $\text{MgSO}_4$ , filtered and concentrated *in vacuo*. Flash chromatography (ethyl acetate/hexane = 1/10) afforded **38** (698.5 mg, 2.04 mmol, 89% yield) as a colorless oil.  $R_f$  0.4 (hexane/ethyl acetate = 4/1); IR (film) 3309 (m), 2983 (m), 2955 (m), 2902 (w), 1713 (w), 1600 (m), 1415 (s), 1140 (s)  $\text{cm}^{-1}$ ;  $^1\text{H}$  NMR (500 MHz,  $\text{CDCl}_3$ )  $\delta$  7.66 (d,  $J = 8.0$  Hz, 1H), 7.47 (t,  $J = 8.5$  Hz, 1H), 7.26 (d,  $J =$



8.5 Hz, 1H), 5.25 (q,  $J = 6.5$  Hz, 1H), 2.04 (br, 1H), 1.48 (d,  $J = 6.0$  Hz, 3H), 0.47 (s, 9H);  $^{13}\text{C}$  NMR (125 MHz,  $\text{CDCl}_3$ )  $\delta$  154.9, 154.5, 131.3, 129.7, 125.3, 119.2, 118.6 (q,  $J = 318.6$  Hz,  $\text{CF}_3$ ), 68.4, 25.7, 2.4; high resolution mass spectrum ( $\text{ES}^+$ )  $m/z$  342.0583  $[(\text{M})^+]$ ; calcd for  $\text{C}_{12}\text{H}_{17}\text{F}_3\text{O}_4\text{SSi}$ : 342.0569].

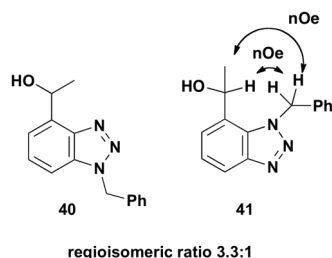

**Compound 40 and 41. Demonstration of Benzyne Reactivity:** To a solution of **38** (19.2 mg, 0.056 mmol, 1.0 equiv.) and benzyl azide (14.6 mg, 0.11 mmol, 2.0 equiv.) in THF (0.6 mL) at  $-78$  °C was added KHMDS (0.5 M in toluene, 0.12 mL, 0.061 mmol, 1.1 equiv.) dropwise. After being stirred for 10 min at  $-78$  °C, 3 mL of 1N HCl was added. After 10 min, a saturated aqueous  $\text{NH}_4\text{Cl}$  (3 mL) solution was added, and the resulting mixture extracted with  $\text{Et}_2\text{O}$  (10 mL x 3). The combined organic layers were washed with brine, dried over  $\text{MgSO}_4$ , filtered and concentrated *in vacuo*. Flash chromatography (ethyl acetate/hexane = 1/2), and preparative thin layer chromatography (ethyl acetate/hexane = 1/2) afforded a 3.3:1 regioisomeric mixture of **40** and **41** (12.1 mg, 0.048 mmol, 85% yield) as a pale yellow oil. **Intermolecular tri-component [3+2] Benzyne Cycloaddition:** To a solution of linchpin **34** (77.4 mg, 0.24 mmol, 1.0 equiv.) in  $\text{Et}_2\text{O}$  (1.2 mL) at  $-78$  °C was added MeLi (1.6 M in diethyl ether, 0.18 mL, 0.29 mmol, 1.2 equiv.) dropwise. After stirring for 5 min at  $-78$  °C, benzyl azide (63.9 mg, 0.48 mmol, 2.0 equiv.) in THF (1.2 mL) was added. After being stirred for 2 min at  $-78$  °C, 3 mL of 1N HCl was added. A saturated aqueous  $\text{NH}_4\text{Cl}$  (5 mL) solution was then added after 10 min, and the resulting mixture extracted with  $\text{Et}_2\text{O}$  (10 mL x 3). The combined organic layers were washed with brine, dried over  $\text{MgSO}_4$ , filtered and concentrated *in vacuo*. Flash chromatography (ethyl acetate/hexane = 1/2), and preparative thin layer chromatography (ethyl acetate/hexane = 1/2) afforded a 3.3:1 regioisomeric mixture of **40** and **41** (40.3 mg, 0.16 mmol, 67% yield) as a pale yellow oil.  $R_f$  0.1 (hexane/ethyl acetate = 2/1); For major regioisomer **40**: IR (film) 3388 (s), 2970 (m), 2928 (m), 1951 (w), 1611 (m), 1496 (m), 1267 (s), 1111 (s)  $\text{cm}^{-1}$ ;  $^1\text{H}$  NMR (500 MHz,  $\text{CDCl}_3$ )  $\delta$  7.38-7.24 (m, 8H),

5.83 (s, 2H), 5.56 (q,  $J = 6.5$  Hz, 1H), 3.59 (br, 1H), 1.75 (d,  $J = 6.5$  Hz, 3H);  $^{13}\text{C}$  NMR (125 MHz,  $\text{CDCl}_3$ )  $\delta$  143.8, 138.0, 134.6, 132.9, 128.9, 128.4, 127.51, 127.49, 119.4, 108.5, 67.8, 52.2, 24.3; high resolution mass spectrum ( $\text{ES}^+$ )  $m/z$  254.1281  $[(\text{M}+\text{H})^+]$ ; calcd for  $\text{C}_{15}\text{H}_{16}\text{N}_3\text{O}$ : 254.1293]; For minor regioisomer **41**: IR (film) 3354 (s), 2975 (m), 2927 (m), 2902 (w), 1951 (w), 1600 (m), 1497 (m), 1248 (s), 1092 (s)  $\text{cm}^{-1}$ ;  $^1\text{H}$  NMR (500 MHz,  $\text{CDCl}_3$ )  $\delta$  8.01 (d,  $J = 8.5$  Hz, 1H), 7.50 (d,  $J = 7.5$  Hz, 1H), 7.34 (t,  $J = 8.0$  Hz, 1H), 7.31-7.24 (m, 3H), 7.04 (d,  $J = 7.0$  Hz, 2H), 6.26 (d,  $J = 16.5$  Hz, 1H), 6.12 (d,  $J = 16.5$  Hz, 1H), 5.15 (q,  $J = 6.0$  Hz, 1H), 1.99 (br, 1H), 1.50 (d,  $J = 6.5$  Hz, 3H);  $^{13}\text{C}$  NMR (125 MHz,  $\text{CDCl}_3$ )  $\delta$  147.3, 136.8, 131.0, 129.0, 128.7, 128.0, 126.2, 123.98, 123.96, 120.0, 65.6, 53.4, 23.3; high resolution mass spectrum ( $\text{CI}^+$ )  $m/z$  254.1287  $[(\text{M}+\text{H})^+]$ ; calcd for  $\text{C}_{15}\text{H}_{16}\text{N}_3\text{O}$ : 254.1293].

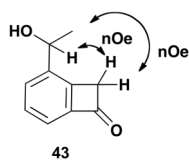

**Compound 43.** To a solution of linchpin **34** (107.1 mg, 0.33 mmol, 1.0 equiv.) and 1,1-diethoxyethylene (190.6 mg, 1.64 mmol, 5.0 equiv.) in THF (3.3 mL) at  $-78$   $^{\circ}\text{C}$  was added MeLi (1.6 M in diethyl ether, 0.25 mL, 0.40 mmol, 1.2 equiv.) dropwise. After being stirred for 10 min at  $-78$   $^{\circ}\text{C}$ , the resulting solution was warmed to  $0$   $^{\circ}\text{C}$ . After 10 min at  $0$   $^{\circ}\text{C}$ , 3 mL of 1N HCl was added and stirred for an additional 2 h at room temperature. A saturated aqueous  $\text{NH}_4\text{Cl}$  (5 mL) solution was then added, and the resulting mixture extracted with  $\text{Et}_2\text{O}$  (10 mL x 3). The combined organic layers were washed with brine, dried over  $\text{MgSO}_4$ , filtered and concentrated *in vacuo*. Flash chromatography (ethyl acetate/hexane = 1/5) afforded **43** (41.6 mg, 0.26 mmol, 78% yield) as a pale yellow oil.  $R_f$  0.2 (hexane/ethyl acetate = 5/1); IR (film) 3422 (m), 2972 (m), 2925 (m), 1765 (s), 1579 (s), 1469 (m), 1281 (m), 1112 (m)  $\text{cm}^{-1}$ ;  $^1\text{H}$  NMR (500 MHz,  $\text{CDCl}_3$ )  $\delta$  7.49 (t,  $J = 7.5$  Hz, 1H), 7.41 (d,  $J = 7.0$  Hz, 1H), 7.30 (d,  $J = 7.5$  Hz, 1H), 4.82 (q,  $J = 6.5$  Hz, 1H), 4.00 (s, 2H), 2.96 (br, 1H), 1.54 (d,  $J = 6.5$  Hz, 3H);  $^{13}\text{C}$  NMR (125 MHz,  $\text{CDCl}_3$ )  $\delta$  188.8, 151.0, 144.0, 142.8, 135.6, 124.8, 122.1, 68.0, 51.9, 24.6; high resolution mass spectrum ( $\text{CI}^+$ )  $m/z$  145.0658  $[(\text{M}-\text{OH})^+]$ ; calcd for  $\text{C}_{10}\text{H}_9\text{O}$ : 145.0653].

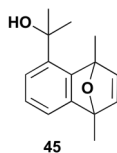

**Compound 45.** To a solution of linchpin **35** (71.9 mg, 0.21 mmol, 1.0 equiv.) and 2,5-dimethylfuran (100.9 mg, 1.05 mmol, 5.0 equiv.) in THF (2.1 mL) at  $-78\text{ }^{\circ}\text{C}$  was added MeLi (1.6 M in diethyl ether, 0.16 mL, 0.25 mmol, 1.2 equiv.) dropwise. After being stirred for 10 min at  $-78\text{ }^{\circ}\text{C}$ , TBAF (1.0 M in THF, 0.63 mL, 0.63 mmol, 3.0 equiv.) was added, and the reaction mixture was stirred for 30 min at room temperature. A saturated aqueous  $\text{NH}_4\text{Cl}$  (3 mL) solution was then added, and the resulting mixture extracted with  $\text{Et}_2\text{O}$  (10 mL x 3). The combined organic layers were washed with brine, dried over  $\text{MgSO}_4$ , filtered and concentrated *in vacuo*. Flash chromatography (ethyl acetate/hexane = 1/10) afforded **45** (38.0 mg, 0.164 mmol, 78% yield) as a white solid.  $R_f$  0.3 (hexane/ethyl acetate = 5/1); mp: 160-163  $^{\circ}\text{C}$ ; IR (film) 3420 (s), 2978 (m), 2933 (m), 1452 (m), 1376 (m), 1132 (m)  $\text{cm}^{-1}$ ;  $^1\text{H}$  NMR (500 MHz,  $\text{CDCl}_3$ )  $\delta$  7.03 (dd,  $J = 5.0$  and 2.5 Hz, 1H), 6.94-6.90 (m, 2H), 6.83 (d,  $J = 5.5$  Hz, 1H), 6.71 (d,  $J = 5.0$  Hz, 1H), 2.20 (s, 3H), 1.88 (s, 3H), 1.70 (s, 3H), 1.65 (br, 1H), 1.59 (s, 3H);  $^{13}\text{C}$  NMR (125 MHz,  $\text{CDCl}_3$ )  $\delta$  154.3, 150.3, 147.3, 147.0, 143.0, 124.5, 122.1, 117.1, 92.2, 86.8, 73.2, 32.3, 32.2, 20.3, 15.2; high resolution mass spectrum ( $\text{ES}^-$ )  $m/z$  229.1223 [(M-H) $^-$ ]; calcd for  $\text{C}_{15}\text{H}_{17}\text{O}_2$ : 229.1229].

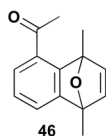

**Compound 46.** To a solution of **35** (71.4 mg, 0.21 mmol, 1.0 equiv.) and 2,5-dimethylfuran (100.8 mg, 1.05 mmol, 5.0 equiv.) in THF (0.6 mL) at  $-78\text{ }^{\circ}\text{C}$  was added KHMDS (0.5 M in toluene, 0.46 mL, 0.23 mmol, 1.1 equiv.) dropwise. After being stirred for 10 min at  $-78\text{ }^{\circ}\text{C}$ , TBAF (1.0 M in THF, 0.63 mL, 0.63 mmol, 3.0 equiv.) was added. After 5 min, a saturated aqueous  $\text{NH}_4\text{Cl}$  (3 mL) solution was then added, and the resulting mixture extracted with  $\text{Et}_2\text{O}$  (10 mL x 3). The combined organic layers were washed with brine, dried over  $\text{MgSO}_4$ , filtered and concentrated *in vacuo*. Flash chromatography (ethyl acetate/hexane = 1/6) afforded **46** (23.4 mg, 0.11 mmol, 52% yield) as a pale yellow solid.  $R_f$  0.4 (hexane/ethyl acetate = 5/1); mp: 82-85  $^{\circ}\text{C}$ ; IR (film)

3072 (w), 2976 (m), 2933 (m), 2870 (w), 1689 (s), 1586 (w), 1416 (m), 1381 (s), 1259 (s)  $\text{cm}^{-1}$ ;  $^1\text{H}$  NMR (500 MHz,  $\text{CDCl}_3$ )  $\delta$  7.21 (t,  $J = 6.5$  Hz, 2H), 7.03 (t,  $J = 7.5$  Hz, 1H), 6.92 (d,  $J = 5.0$  Hz, 1H), 6.75 (d,  $J = 5.0$  Hz, 1H), 2.57 (s, 3H), 1.89 (s, 3H), 1.85 (s, 3H);  $^{13}\text{C}$  NMR (125 MHz,  $\text{CDCl}_3$ )  $\delta$  200.5, 154.6, 153.1, 147.0, 146.6, 133.5, 124.8, 123.8, 120.6, 90.9, 87.3, 28.6, 17.0, 15.2; high resolution mass spectrum ( $\text{CI}^+$ )  $m/z$  215.1075  $[(\text{M}+\text{H})^+]$ ; calcd for  $\text{C}_{14}\text{H}_{15}\text{O}_2$ : 215.1072].

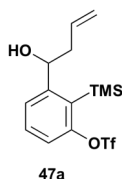

**Compound 47a.** To a solution of **34** (219.0 mg, 0.67 mmol, 1.0 equiv.) in  $\text{Et}_2\text{O}$  (3.4 mL) at  $0^\circ\text{C}$  was added allylmagnesium bromide (1.0 M in diethyl ether, 0.80 mL, 0.80 mmol, 1.2 equiv.) dropwise. After stirring for 5 min at  $0^\circ\text{C}$ , a saturated aqueous  $\text{NH}_4\text{Cl}$  (5 mL) solution was added, and the resulting mixture extracted with  $\text{Et}_2\text{O}$  (10 mL x 3). The combined organic layers were washed with brine, dried over  $\text{MgSO}_4$ , filtered and concentrated *in vacuo*. Flash chromatography (ethyl acetate/hexane = 1/10) afforded **47a** (228.4 mg, 0.62 mmol, 92% yield) as a colorless oil.  $R_f$  0.4 (hexane/ethyl acetate = 5/1); IR (film) 3414 (m), 2954 (m), 2906 (m), 1952 (w), 1642 (m), 1599 (m), 1556 (m), 1418 (s), 1211 (s), 1146 (s)  $\text{cm}^{-1}$ ;  $^1\text{H}$  NMR (500 MHz,  $\text{CDCl}_3$ )  $\delta$  7.63 (d,  $J = 8.0$  Hz, 1H), 7.46 (t,  $J = 8.0$  Hz, 1H), 7.26 (d,  $J = 8.5$  Hz, 1H), 5.88-8.80 (m, 1H), 5.32-5.19 (m, 2H), 5.09-5.06 (m, 1H), 2.47-2.39 (m, 2H), 2.12 (br, 1H), 0.46 (s, 9H);  $^{13}\text{C}$  NMR (125 MHz,  $\text{CDCl}_3$ )  $\delta$  154.7, 153.0, 134.0, 131.1, 130.0, 125.7, 119.3, 119.0, 118.6 (q,  $J = 318.8$  Hz,  $\text{CF}_3$ ), 71.1, 44.4, 2.5; high resolution mass spectrum ( $\text{ES}^+$ )  $m/z$  391.0630  $[(\text{M}+\text{Na})^+]$ ; calcd for  $\text{C}_{14}\text{H}_{19}\text{F}_3\text{O}_4\text{SSiNa}$ : 391.0630].

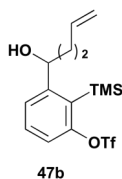

**Compound 47b.** To a solution of **34** (305.0 mg, 0.93 mmol, 1.0 equiv.) in  $\text{Et}_2\text{O}$  (4.7 mL) at  $0^\circ\text{C}$  was added 3-butenylmagnesium bromide (0.35 M in diethyl ether, 3.98 mL, 1.39 mmol, 1.5 equiv.) dropwise. After stirring for 5 min at  $0^\circ\text{C}$ , a saturated aqueous  $\text{NH}_4\text{Cl}$  (5 mL) solution was added, and the resulting mixture extracted with  $\text{Et}_2\text{O}$  (10 mL x 3).

The combined organic layers were washed with brine, dried over MgSO<sub>4</sub>, filtered and concentrated *in vacuo*. Flash chromatography (ethyl acetate/hexane = 1/10) afforded **47b** (284.8 mg, 0.75 mmol, 80% yield) as a pale yellow oil. R<sub>f</sub> 0.4 (hexane/ethyl acetate = 5/1); IR (film) 3406 (m), 3079 (m), 2952 (s), 2853 (m), 1950 (w), 1641 (m), 1599 (m), 1555 (m), 1418 (s), 1252 (s), 1146 (s) cm<sup>-1</sup>; <sup>1</sup>H NMR (500 MHz, CDCl<sub>3</sub>) δ 7.62 (d, *J* = 7.5 Hz, 1H), 7.46 (t, *J* = 8.0 Hz, 1H), 7.26 (d, *J* = 8.5 Hz, 1H), 5.90-5.82 (m, 1H), 5.11-5.02 (m, 3H), 2.37-2.30 (m, 1H), 2.20-2.13 (m, 1H), 2.06 (br, 1H), 1.92-1.84 (m, 1H), 1.75-1.69 (m, 1H), 0.47 (s, 9H); <sup>13</sup>C NMR (125 MHz, CDCl<sub>3</sub>) δ 154.6, 153.9, 137.8, 131.2, 130.1, 125.8, 119.3, 118.5 (q, *J* = 318.6 Hz, CF<sub>3</sub>), 115.4, 71.7, 38.6, 30.4, 2.4; high resolution mass spectrum (ES<sup>+</sup>) *m/z* 405.0779 [(M+Na)<sup>+</sup>; calcd for C<sub>15</sub>H<sub>21</sub>F<sub>3</sub>O<sub>4</sub>SSiNa: 405.0780].

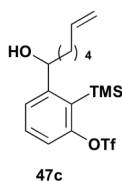

**Compound 47c.** To a solution of **34** (261.0 mg, 0.80 mmol, 1.0 equiv.) in Et<sub>2</sub>O (4.0 mL) at 0 °C was added 5-hexenylmagnesium bromide (0.58 M in diethyl ether, 2.07 mL, 1.20 mmol, 1.5 equiv.) dropwise. After stirring for 5 min at 0 °C, a saturated aqueous NH<sub>4</sub>Cl (5 mL) solution was added, and the resulting mixture extracted with Et<sub>2</sub>O (10 mL x 3). The combined organic layers were washed with brine, dried over MgSO<sub>4</sub>, filtered and concentrated *in vacuo*. Flash chromatography (ethyl acetate/hexane = 1/10) afforded **47c** (257.3 mg, 0.63 mmol, 78% yield) as a pale yellow oil. R<sub>f</sub> 0.3 (hexane/ethyl acetate = 5/1); IR (film) 3395 (m), 2935 (s), 2859 (m), 1950 (w), 1641 (w), 1599 (m), 1555 (w), 1419 (s), 1210 (s), 920 (s) cm<sup>-1</sup>; <sup>1</sup>H NMR (500 MHz, CDCl<sub>3</sub>) δ 7.61 (d, *J* = 8.0 Hz, 1H), 7.45 (t, *J* = 8.0 Hz, 1H), 7.26 (d, *J* = 8.0 Hz, 1H), 5.84-5.76 (m, 1H), 5.02-4.94 (m, 3H), 2.09-2.03 (m, 3H), 1.80-1.71 (m, 1H), 1.68-1.56 (m, 2H), 1.46-1.41 (m, 2H), 1.37-1.26 (m, 1H), 0.49 (s, 9H); <sup>13</sup>C NMR (125 MHz, CDCl<sub>3</sub>) δ 154.6, 154.2, 138.6, 131.1, 130.0, 125.6, 119.2, 118.6 (q, *J* = 318.6 Hz, CF<sub>3</sub>), 114.5, 72.4, 33.7, 39.6, 28.8, 25.7, 2.4; high resolution mass spectrum (ES<sup>-</sup>) *m/z* 409.1117 [(M-H)<sup>-</sup>; calcd for C<sub>17</sub>H<sub>24</sub>F<sub>3</sub>O<sub>4</sub>SSi: 409.1117].

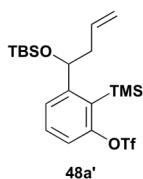

**Compound 48a'**. To a solution of **47a** (228.4 mg, 0.62 mmol, 1.0 equiv.) in CH<sub>2</sub>Cl<sub>2</sub> (3.1 mL) at -78 °C was added TBDMSOTf (327.8 mg, 1.24 mmol, 2.0 equiv.) dropwise. After being stirred for 20 min at room temperature, a saturated aqueous CuSO<sub>4</sub> (5 mL) solution was added, and the resulting mixture extracted with Et<sub>2</sub>O (10 mL x 3). The combined organic layers were washed with brine, dried over MgSO<sub>4</sub>, filtered and concentrated *in vacuo*. Flash chromatography (ethyl acetate/hexane = 1/200) afforded **48a'** (284.8 mg, 0.59 mmol, 95% yield) as a pale yellow oil. R<sub>f</sub> 0.9 (hexane/ethyl acetate = 5/1); IR (film) 3078 (m), 2955 (s), 2932 (s), 2859 (s), 1950 (w), 1642 (m), 1599 (m), 1555 (m), 1421 (s), 1253 (s), 1145 (s), 924 (s) cm<sup>-1</sup>; <sup>1</sup>H NMR (500 MHz, CDCl<sub>3</sub>) δ 7.68 (d, *J* = 8.0 Hz, 1H), 7.43 (t, *J* = 8.0 Hz, 1H), 7.26 (d, *J* = 9.0 Hz, 1H), 5.89-5.80 (m, 1H), 5.11-5.04 (m, 3H), 2.32 (t, *J* = 6.5 Hz, 2H), 0.9 (s, 9H), 0.5 (s, 9H), 0.1 (s, 3H), -0.1 (s, 3H); <sup>13</sup>C NMR (125 MHz, CDCl<sub>3</sub>) δ 155.4, 154.9, 134.6, 130.7, 127.7, 125.7, 118.5 (q, *J* = 318.5 Hz, CF<sub>3</sub>), 117.7, 117.5, 71.2, 46.5, 25.8, 18.2, 2.6, -4.5, -4.6; high resolution mass spectrum (ESI<sup>+</sup>) *m/z* 505.1484 [(M+Na)<sup>+</sup>; calcd for C<sub>20</sub>H<sub>33</sub>F<sub>3</sub>O<sub>4</sub>SSi<sub>2</sub>Na: 505.1488].

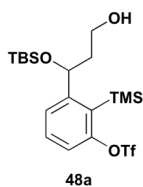

**Compound 48a**. To a solution of **48a'** (219.5 mg, 0.46 mmol, 1.0 equiv.) in CH<sub>2</sub>Cl<sub>2</sub>:MeOH (22.7 mL, 5:1 v/v) at -78 °C was bubbled ozone. After being stirred for 10 min, oxygen was bubbled through the resulting solution for 20 min until the blue color disappeared. To the resulting solution was added NaBH<sub>4</sub> (34.0 mg, 0.90 mmol, 2.0 equiv.) portionwise at -78 °C. After being stirred for 1 h at room temperature, a saturated aqueous NH<sub>4</sub>Cl (5 mL) solution was added, and the resulting mixture extracted with CH<sub>2</sub>Cl<sub>2</sub> (10 mL x 3). The combined organic layers were washed with brine, dried over MgSO<sub>4</sub>, filtered and concentrated *in vacuo*. Flash chromatography (ethyl acetate/hexane = 1/10) afforded **48a** (164.5 mg, 0.34 mmol, 74% yield) as a pale yellow oil. R<sub>f</sub> 0.4 (hexane/ethyl acetate = 5/1); IR (film) 3418 (m), 2955 (s), 2893 (s), 2859 (s), 1687 (w),

1599 (m), 1555 (m), 1420 (s), 1253 (s), 1144 (s), 933 (s)  $\text{cm}^{-1}$ ;  $^1\text{H}$  NMR (500 MHz,  $\text{CDCl}_3$ )  $\delta$  7.68 (d,  $J = 8.0$  Hz, 1H), 7.44 (t,  $J = 8.0$  Hz, 1H), 7.28 (d,  $J = 8.0$  Hz, 1H), 5.32 (dd,  $J = 8.5$  and  $3.0$  Hz, 1H), 3.83-3.74 (m, 2H), 2.49 (br, 1H), 1.96-1.90 (m, 1H), 1.81-1.74 (m, 1H), 0.9 (s, 9H), 0.5 (s, 9H), 0.1 (s, 3H),  $-0.2$  (s, 3H);  $^{13}\text{C}$  NMR (125 MHz,  $\text{CDCl}_3$ )  $\delta$  155.5, 154.5, 130.8, 127.7, 125.7, 118.5 (q,  $J = 318.2$  Hz,  $\text{CF}_3$ ), 117.9, 71.7, 60.0, 43.2, 25.7, 18.0, 2.5,  $-4.6$ ,  $-4.9$ ; high resolution mass spectrum (ESI $^+$ )  $m/z$  509.1418 [(M+Na) $^+$ ]; calcd for  $\text{C}_{19}\text{H}_{33}\text{F}_3\text{O}_5\text{SSi}_2\text{Na}$ : 509.1437].

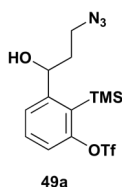

**Compound 49a.** To a solution of **48a** (160.0 mg, 0.33 mmol, 1.0 equiv.) in  $\text{CH}_2\text{Cl}_2$  (6.6 mL) at  $0^\circ\text{C}$  were added triethylamine (100.2 mg, 0.99 mmol, 3.0 equiv.) and methane sulfonyl chloride (75.6 mL, 0.66 mmol, 2.0 equiv.) dropwise. After being stirred for 30 min at  $0^\circ\text{C}$ , a saturated aqueous  $\text{NaHCO}_3$  (5 mL) solution was added, and the resulting mixture extracted with  $\text{Et}_2\text{O}$  (10 mL x 3). The combined organic layers were washed with brine, dried over  $\text{MgSO}_4$ , filtered and concentrated *in vacuo*. To a solution of the crude product in DMF (6.6 mL) were added sodium azide (128.7, 1.98 mmol, 6.0 equiv.) and 15-crown-5 (cat.). After stirring for 12 h at  $70^\circ\text{C}$ , a saturated aqueous  $\text{NaHCO}_3$  (5 mL) solution was added, and the resulting mixture extracted with  $\text{Et}_2\text{O}$  (10 mL x 3). The combined organic layers were washed with brine, dried over  $\text{MgSO}_4$ , filtered and concentrated *in vacuo*. To a solution of the resulting azide was added 3.2 mL of 3% HCl in MeOH. After 12 h at room temperature, a saturated aqueous  $\text{NH}_4\text{Cl}$  (5 mL) solution was added, and the resulting mixture extracted with  $\text{CH}_2\text{Cl}_2$  (10 mL x 3). The combined organic layers were washed with brine, dried over  $\text{MgSO}_4$ , filtered and concentrated *in vacuo*. Flash chromatography (ethyl acetate/hexane = 1/10) afforded **49a** (75.0 mg, 0.19 mmol, 57% yield over 3 steps) as a pale yellow oil.  $R_f$  0.3 (hexane/ethyl acetate = 5/1); IR (film) 3436 (w), 2956 (m), 2101 (s), 1599 (m), 1556 (w), 1417 (s), 1214 (s), 1143 (s)  $\text{cm}^{-1}$ ;  $^1\text{H}$  NMR (500 MHz,  $\text{CDCl}_3$ )  $\delta$  7.62 (d,  $J = 8.0$  Hz, 1H), 7.48 (t,  $J = 8.0$  Hz, 1H), 7.28 (d,  $J = 8.0$  Hz, 1H), 5.19 (dd,  $J = 10.0$  and  $3.0$  Hz, 1H), 3.66-3.60 (m, 1H), 3.55-3.50 (m, 1H), 2.13 (br, 1H), 2.02-1.94 (m, 1H), 1.89-1.82 (m, 1H), 0.48 (s, 9H);  $^{13}\text{C}$  NMR

(125 MHz, CDCl<sub>3</sub>)  $\delta$  154.6, 153.1, 131.3, 130.3, 125.8, 119.7, 118.6 (q,  $J$  = 318.7 Hz, CF<sub>3</sub>), 69.6, 48.6, 38.2, 2.4; high resolution mass spectrum (ESI<sup>+</sup>)  $m/z$  398.0826 [(M+H)<sup>+</sup>; calcd for C<sub>13</sub>H<sub>19</sub>F<sub>3</sub>N<sub>3</sub>O<sub>4</sub>SSi: 398.0818].

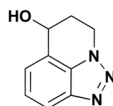

50a

**Compound 50a.** To a solution of **49a** (53.4 mg, 0.13 mmol, 1.0 equiv.) in THF (26.9 mL) at -78 °C was added KHMDS (0.5 M in toluene, 0.29 mL, 0.14 mmol, 1.1 equiv.) dropwise. After the addition was complete, the reaction mixture was then warmed to room temperature over 2 h. The resulting solution was concentrated *in vacuo* before 5 mL of 1N HCl was added. After 10 min, a saturated aqueous NH<sub>4</sub>Cl (5 mL) solution was added, and the resulting mixture extracted with Et<sub>2</sub>O (10 mL x 3). The combined organic layers were washed with brine, dried over MgSO<sub>4</sub>, filtered and concentrated *in vacuo*. Flash chromatography (ethyl acetate) afforded **50a** (17.9 mg, 0.10 mmol, 76% yield) as a pale yellow oil. R<sub>f</sub> 0.1 (ethyl acetate); IR (film) 3357 (s), 2926 (m), 2854 (m), 1657 (w), 1638 (w), 1516 (w), 1469 (m), 1085 (s), 955 (s) cm<sup>-1</sup>; <sup>1</sup>H NMR (500 MHz, CDCl<sub>3</sub>)  $\delta$  7.82 (d,  $J$  = 8.0 Hz, 1H), 7.40 (d,  $J$  = 7.0 Hz, 1H), 7.31 (t,  $J$  = 7.5 Hz, 1H), 5.25 (br, 1H), 4.80-4.70 (m, 2H), 3.11 (br, 1H), 2.54-2.49 (m, 1H), 2.39-2.33 (m, 1H); <sup>13</sup>C NMR (125 MHz, CDCl<sub>3</sub>)  $\delta$  143.9, 131.3, 124.9, 124.3, 122.9, 118.7, 63.6, 42.0, 31.9; high resolution mass spectrum (CI<sup>+</sup>)  $m/z$  176.0830 [(M+H)<sup>+</sup>; calcd for C<sub>9</sub>H<sub>10</sub>N<sub>3</sub>O: 176.0824].

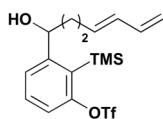

51

**Compound 51.** To a solution of **34** (413.7 mg, 1.26 mmol, 1.0 equiv.) in Et<sub>2</sub>O (6.3 mL) at 0 °C was added (*E*)-hexadienylmagnesium bromide (0.25 M in diethyl ether, 7.56 mL, 1.89 mmol, 1.5 equiv.) dropwise. After stirring for 5 min at 0 °C, a saturated aqueous NH<sub>4</sub>Cl (5 mL) solution was added, and the resulting mixture extracted with Et<sub>2</sub>O (10 mL x 3). The combined organic layers were washed with brine, dried over MgSO<sub>4</sub>, filtered and concentrated *in vacuo*. Flash chromatography (ethyl acetate/hexane = 1/20) afforded **51** (392.7 mg, 0.96 mmol, 76% yield) as a pale yellow oil. R<sub>f</sub> 0.4 (hexane/ethyl acetate = 5/1); IR (film) 3399 (m), 3087 (w), 2952 (m), 2845 (w), 1653 (w), 1600 (m), 1417 (s),



1213 (s), 842 (s)  $\text{cm}^{-1}$ ;  $^1\text{H}$  NMR (500 MHz,  $\text{CDCl}_3$ )  $\delta$  7.61 (d,  $J = 7.5$  Hz, 1H), 7.46 (t,  $J = 8.0$  Hz, 1H), 7.26 (d,  $J = 8.5$  Hz, 1H), 6.34-6.28 (m, 1H), 6.15-6.10 (m, 1H), 5.75-5.71 (m, 1H), 5.13 (d,  $J = 17.0$  Hz, 1H), 5.05-5.00 (m, 2H), 2.40-2.35 (m, 1H), 2.23-2.19 (m, 1H), 2.00 (br, 1H), 1.91-1.87 (m, 1H), 1.75-1.69 (m, 1H), 0.47 (s, 9H);  $^{13}\text{C}$  NMR (125 MHz,  $\text{CDCl}_3$ )  $\delta$  154.6, 153.8, 136.9, 133.6, 132.0, 131.2, 130.1, 125.8, 119.3, 118.5 (q,  $J = 318.5$  Hz,  $\text{CF}_3$ ), 115.5, 71.6, 38.7, 29.1, 2.4; high resolution mass spectrum (ESI $^+$ )  $m/z$  431.0926 [(M+Na) $^+$ ]; calcd for  $\text{C}_{17}\text{H}_{23}\text{F}_3\text{O}_4\text{SSiNa}$ : 431.0936].

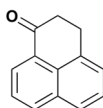

52

**Compound 52.** To a solution of **51** (66.4 mg, 0.16 mmol, 1.0 equiv.) in THF (32.5 mL) at  $-78$   $^\circ\text{C}$  was added KHMDS (0.5 M in toluene, 0.36 mL, 0.18 mmol, 1.1 equiv.) dropwise. After the addition was complete, the reaction mixture was then warmed to room temperature over 2 h. The resulting solution was concentrated *in vacuo* before THF (5 mL) and TBAF (1.0 M in THF, 0.48 mL, 0.48 mmol, 3.0 equiv.) were added. After 30 min, a saturated aqueous  $\text{NH}_4\text{Cl}$  (5 mL) solution was added, and the resulting mixture extracted with  $\text{Et}_2\text{O}$  (10 mL x 3). The combined organic layers were washed with brine, dried over  $\text{MgSO}_4$ , filtered and concentrated *in vacuo*. To a solution of cycloadduct in  $\text{CH}_2\text{Cl}_2$  (2.3 mL) was added PCC (103.5 mg, 0.48 mmol, 3.0 equiv.). After being stirred for 1 h at room temperature, the reaction mixture was filtered through silica gel and concentrated *in vacuo*. Flash chromatography (ethyl acetate/hexane = 1/10) afforded **52** (21.0 mg, 0.114 mmol, 71% yield over 2 steps) as a pale yellow solid.  $R_f$  0.5 (hexane/ethyl acetate = 5/1); mp 80-83  $^\circ\text{C}$ ; IR (film) 3059 (m), 2927 (m), 2851 (m), 1681 (s), 1619 (m), 1588 (m), 1342 (s), 926 (s)  $\text{cm}^{-1}$ ;  $^1\text{H}$  NMR (500 MHz,  $\text{CDCl}_3$ )  $\delta$  8.20 (dd,  $J = 7.0$  and 1.0 Hz, 1H), 8.09 (dd,  $J = 8.0$  and 1.0 Hz, 1H), 7.80 (d,  $J = 8.0$  Hz, 1H), 7.60 (t,  $J = 7.5$  Hz, 1H), 7.51-7.45 (m, 2H), 3.44 (t,  $J = 7.0$  Hz, 2H), 2.98 (t,  $J = 7.0$  Hz, 2H);  $^{13}\text{C}$  NMR (125 MHz,  $\text{CDCl}_3$ )  $\delta$  198.6, 134.0, 133.4, 133.2, 131.6, 129.8, 128.5, 126.2, 125.7, 125.5, 125.0, 38.5, 28.5; high resolution mass spectrum ( $\text{CI}^+$ )  $m/z$  182.0730 [(M) $^+$ ]; calcd for  $\text{C}_{13}\text{H}_{10}\text{O}$ : 182.0732]. **Alternative:** To a solution of **51** (66.7 mg, 0.17 mmol, 1.0 equiv.) in  $\text{Et}_2\text{O}$  (1.6 mL) at  $-78$   $^\circ\text{C}$  was added MeLi (1.6 M in diethyl ether, 0.12 mL, 0.19 mmol, 1.1 equiv.) dropwise. After being stirred for 5 min,  $\text{Et}_2\text{O}$  (31.0 mL) was

added. To the resulting solution, KO $t$ -Bu (1.0 M in THF, 0.19 mL, 0.19 mmol, 1.1 equiv.) was then added at  $-78$  °C. After the addition was complete, the reaction mixture was then warmed to room temperature over 2 h. The resulting solution was concentrated *in vacuo* before THF (5 mL) and TBAF (1.0 M in THF, 0.48 mL, 0.48 mmol, 3.0 equiv.) were added. After 30 min, a saturated aqueous NH<sub>4</sub>Cl (5 mL) solution was added, and the resulting mixture extracted with Et<sub>2</sub>O (10 mL x 3). The combined organic layers were washed with brine, dried over MgSO<sub>4</sub>, filtered and concentrated *in vacuo*. To a solution of cycloadduct in CH<sub>2</sub>Cl<sub>2</sub> (2.3 mL) was added PCC (109.9 mg, 0.51 mmol, 3.0 equiv.). After being stirred for 1 h at room temperature, the reaction mixture was filtered through silica gel and concentrated *in vacuo*. Flash chromatography (ethyl acetate/hexane = 1/10) afforded **52** (23.2 mg, 0.127 mmol, 75% yield over 2 steps) as a pale yellow solid.

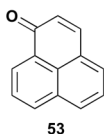

**Compound 53.** To a solution of **51** (89.6 mg, 0.22 mmol, 1.0 equiv.) in THF (43.9 mL) at  $-78$  °C was added KHMDS (0.5 M in toluene, 0.48 mL, 0.24 mmol, 1.1 equiv.) dropwise. After the addition was complete, the reaction mixture was then warmed to room temperature over 2 h. The resulting solution was concentrated *in vacuo* before THF (5 mL) and TBAF (1.0 M in THF, 0.66 mL, 0.66 mmol, 3.0 equiv.) were added. After 30 min, a saturated aqueous NH<sub>4</sub>Cl (5 mL) solution was added, and the resulting mixture extracted with Et<sub>2</sub>O (10 mL x 3). The combined organic layers were washed with brine, dried over MgSO<sub>4</sub>, filtered and concentrated *in vacuo*. To a solution of cycloadduct in Et<sub>2</sub>O (2.5 mL) was added MnO<sub>2</sub> (382.5 mg, 4.4 mmol, 20.0 equiv.). After being stirred for 12 h at room temperature, the reaction mixture was filtered through silica gel and concentrated *in vacuo*. Flash chromatography (ethyl acetate/hexane = 1/10) afforded **53** (22.9 mg, 0.127 mmol, 58% yield over 2 steps) as a pale yellow solid. R<sub>f</sub> 0.5 (hexane/ethyl acetate = 5/1); mp 150-153 °C; IR (film) 3041 (m), 2926 (m), 2855 (m), 1640 (s), 1581 (s), 1393 (m), 1358 (m), 1557 (m), 1238 (m), 831 (s) cm<sup>-1</sup>; <sup>1</sup>H NMR (500 MHz, CDCl<sub>3</sub>) δ 8.63 (d,  $J$  = 7.5 Hz, 1H), 8.20 (dd,  $J$  = 8.0 and 1.0 Hz, 1H), 8.03 (d,  $J$  = 8.0 Hz, 1H), 7.80-7.74 (m, 3H), 7.59 (dd,  $J$  = 8.5 and 7.0 Hz, 1H), 6.73 (d,  $J$  = 10.0 Hz, 1H); <sup>13</sup>C NMR (125 MHz, CDCl<sub>3</sub>) δ 185.6, 141.7, 134.9, 132.2, 131.9, 131.3, 130.4,

129.5, 129.3, 127.9, 127.6, 127.1, 126.6; high resolution mass spectrum (CI<sup>+</sup>) *m/z* 181.0651 [(M+H)<sup>+</sup>; calcd for C<sub>13</sub>H<sub>9</sub>O: 181.0653].

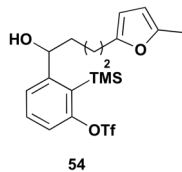

**Compound 54.** To a solution of **34** (231.2 mg, 0.71 mmol, 1.0 equiv.) in Et<sub>2</sub>O (3.5 mL) at 0 °C was added (3-(5-methylfuran-2-yl)propyl)magnesium bromide (0.7 M in diethyl ether, 1.52 mL, 1.06 mmol, 1.5 equiv.) dropwise. After stirring for 5 min at 0 °C, a saturated aqueous NH<sub>4</sub>Cl (5 mL) solution was added, and the resulting mixture extracted with Et<sub>2</sub>O (10 mL x 3). The combined organic layers were washed with brine, dried over MgSO<sub>4</sub>, filtered and concentrated *in vacuo*. Flash chromatography (ethyl acetate/hexane = 1/20) afforded **54** (262.8 mg, 0.58 mmol, 82% yield) as a pale yellow oil. R<sub>f</sub> 0.4 (hexane/ethyl acetate = 5/1); IR (film) 3411 (m), 3104 (w), 2951 (s), 2867 (m), 1642 (w), 1600 (m), 1570 (m), 1557 (m), 1418 (s), 1248 (s), 1141 (s), 844 (s) cm<sup>-1</sup>; <sup>1</sup>H NMR (500 MHz, CDCl<sub>3</sub>) δ 7.61 (d, *J* = 8.0 Hz, 1H), 7.46 (t, *J* = 8.0 Hz, 1H), 7.26 (d, *J* = 8.5 Hz, 1H), 5.86-5.84 (m, 2H), 5.03 (dd, *J* = 8.5 and 3.5 Hz, 1H), 2.68-2.57 (m, 2H), 2.25 (s, 3H), 1.98-1.90 (m, 2H), 1.83-1.71 (m, 1H), 1.69-1.64 (m, 2H), 0.46 (s, 9H); <sup>13</sup>C NMR (125 MHz, CDCl<sub>3</sub>) δ 154.6, 154.1, 153.6, 150.3, 131.2, 129.9, 125.6, 119.2, 118.6 (q, *J* = 319.1 Hz, CF<sub>3</sub>), 105.8, 105.7, 72.3, 39.1, 27.8, 24.8, 13.4, 2.4; high resolution mass spectrum (ESI<sup>+</sup>) *m/z* 473.1046 [(M+Na)<sup>+</sup>; calcd for C<sub>19</sub>H<sub>25</sub>F<sub>3</sub>O<sub>5</sub>SSiNa: 473.1042].

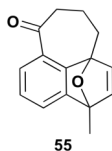

**Compound 55. Intramolecular [4+2] Benzyne Cycloaddition:** To a solution of **54** (51.0 mg, 0.11 mmol, 1.0 equiv.) in THF (22.6 mL) at -78 °C was added KHMDS (0.5 M in toluene, 0.24 mL, 0.12 mmol, 1.1 equiv.) dropwise. After the addition was complete, the reaction mixture was then warmed to room temperature over 2 h. The resulting solution was concentrated *in vacuo* before THF (5 mL) and TBAF (1.0 M in THF, 0.33 mL, 0.33 mmol, 3.0 equiv.) were added. After 30 min, a saturated aqueous NH<sub>4</sub>Cl (5 mL) solution was added, and the resulting mixture extracted with Et<sub>2</sub>O (10 mL x 3). The combined organic layers were washed with brine, dried over MgSO<sub>4</sub>, filtered and

concentrated *in vacuo*. To a solution of cycloadduct in CH<sub>2</sub>Cl<sub>2</sub> (1.6 mL) was added PCC (36.6 mg, 0.17 mmol, 1.5 equiv.). After being stirred for 1 h at room temperature, the reaction mixture was filtered through silica gel and concentrated *in vacuo*. Flash chromatography (ethyl acetate/hexane = 1/5) afforded **55** (21.0 mg, 0.09 mmol, 82% yield over 2 steps) as a pale yellow oil. R<sub>f</sub> 0.4 (hexane/ethyl acetate = 2/1); **One-Pot Intramolecular [4+2] Benzyne Cycloaddition**: To a solution of iodide **56** (125.0 mg, 0.50 mmol, 2.0 equiv.) in Et<sub>2</sub>O (0.6 mL) at -78 °C was added *t*-BuLi (1.7 M in pentane, 0.65 mL, 1.1 mmol, 4.4 equiv.) dropwise. After being stirred for 30 min at -78 °C, the resulting solution was warmed to room temperature. After 5 min at room temperature, the resulting solution was added to a solution of linchpin **34** (81.4 mg, 0.25 mmol, 1.0 equiv.) in Et<sub>2</sub>O (1.4 mL) at -78 °C. After being stirred for 10 min at -78 °C, Et<sub>2</sub>O (47.9 mL) was added. To the resulting solution, KO*t*-Bu (1.0 M in THF, 0.50 mL, 0.50 mmol, 2.0 equiv.) was then added at -78 °C. After the addition was complete, the reaction mixture was then warmed to room temperature over 2 h. The resulting solution was concentrated *in vacuo* before THF (5 mL) and TBAF (1.0 M in THF, 0.75 mL, 0.75 mmol, 3.0 equiv.) were added. After 30 min, a saturated aqueous NH<sub>4</sub>Cl (5 mL) solution was added, and the resulting mixture extracted with Et<sub>2</sub>O (10 mL x 3). The combined organic layers were washed with brine, dried over MgSO<sub>4</sub>, filtered and concentrated *in vacuo*. To a solution of cycloadduct in CH<sub>2</sub>Cl<sub>2</sub> (3.6 mL) was added PCC (81.9 mg, 0.38 mmol, 1.5 equiv.). After being stirred for 1 h at room temperature, the reaction mixture was filtered through silica gel and concentrated *in vacuo*. Flash chromatography (ethyl acetate/hexane = 1/5) afforded **55** (18.9 mg, 0.08 mmol, 33% yield over 2 steps) as a pale yellow oil. R<sub>f</sub> 0.4 (hexane/ethyl acetate = 2/1); IR (film) 3069 (w), 2933 (s), 2866 (m), 1672 (s), 1605 (m), 1450 (m), 1417 (m), 1294 (s), 1227 (m), 1134 (m), 982 (s) cm<sup>-1</sup>; <sup>1</sup>H NMR (500 MHz, CDCl<sub>3</sub>) δ 7.45 (d, *J* = 8.0 Hz, 1H), 7.25 (d, *J* = 6.0 Hz, 1H), 7.06 (t, *J* = 8.0 Hz, 1H), 6.91 (d, *J* = 5.5 Hz, 1H), 6.81 (d, *J* = 5.5 Hz, 1H), 3.02-2.97 (m, 1H), 2.90-2.85 (m, 1H), 2.63-2.59 (m, 1H), 2.36 (app t, *J* = 12.5 Hz, 1H), 2.27-2.20 (m, 1H), 2.08-2.01 (m, 1H), 1.93 (s, 3H); <sup>13</sup>C NMR (125 MHz, CDCl<sub>3</sub>) δ 201.1, 153.4, 151.5, 147.3, 145.6, 130.9, 125.5, 124.4, 122.0, 92.8, 88.5, 46.1, 32.3, 20.6, 15.1; high resolution mass spectrum (CI<sup>+</sup>) *m/z* 227.1065 [(M+H)<sup>+</sup>; calcd for C<sub>15</sub>H<sub>14</sub>F<sub>3</sub>O<sub>2</sub>: 227.1072].

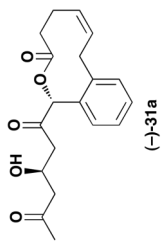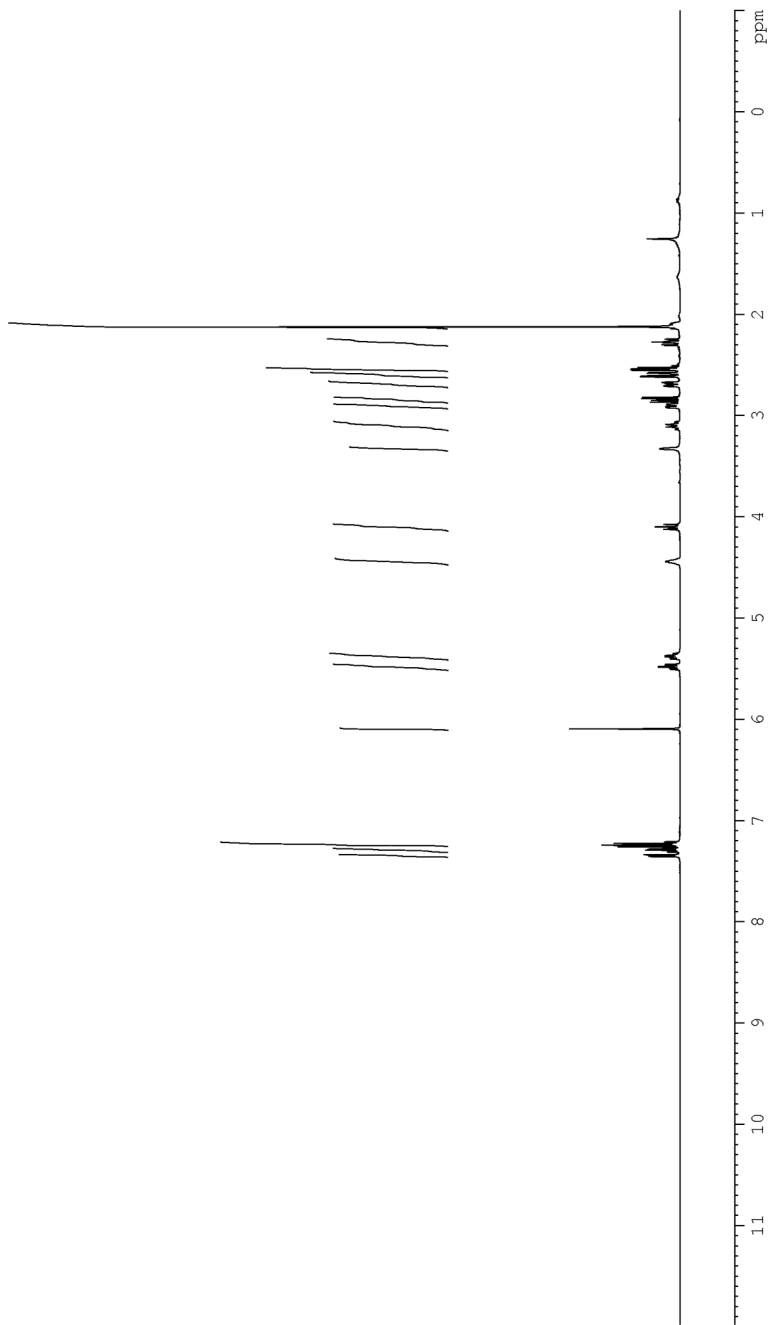

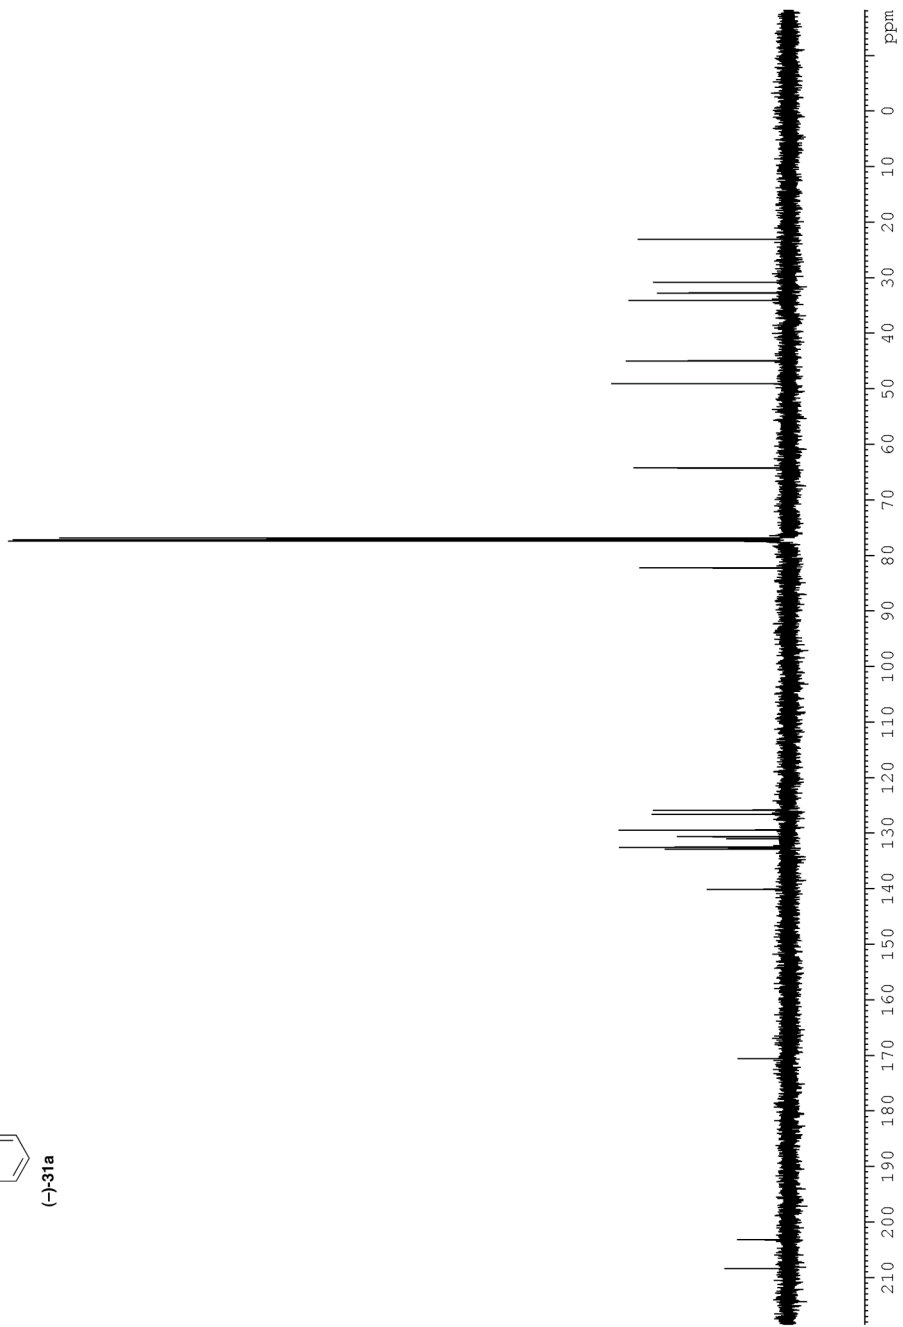

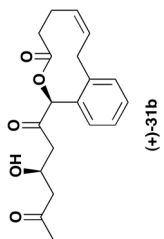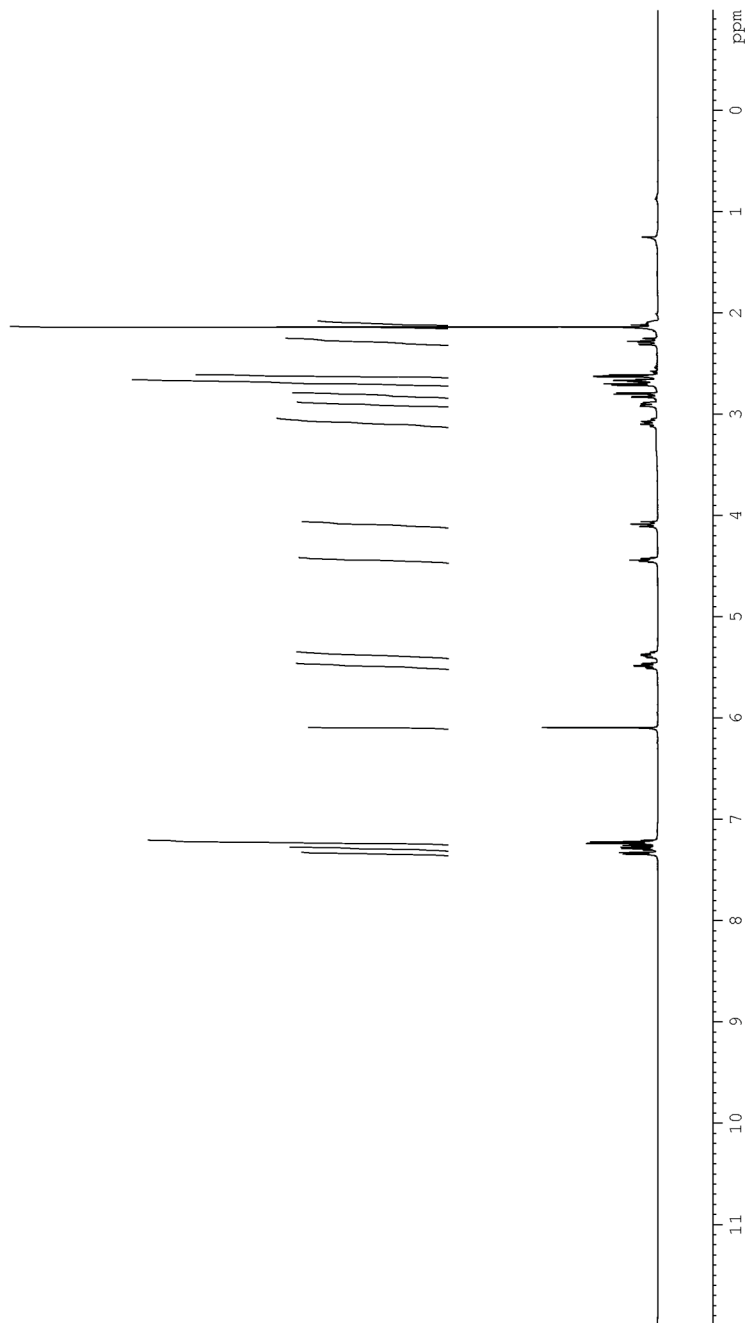

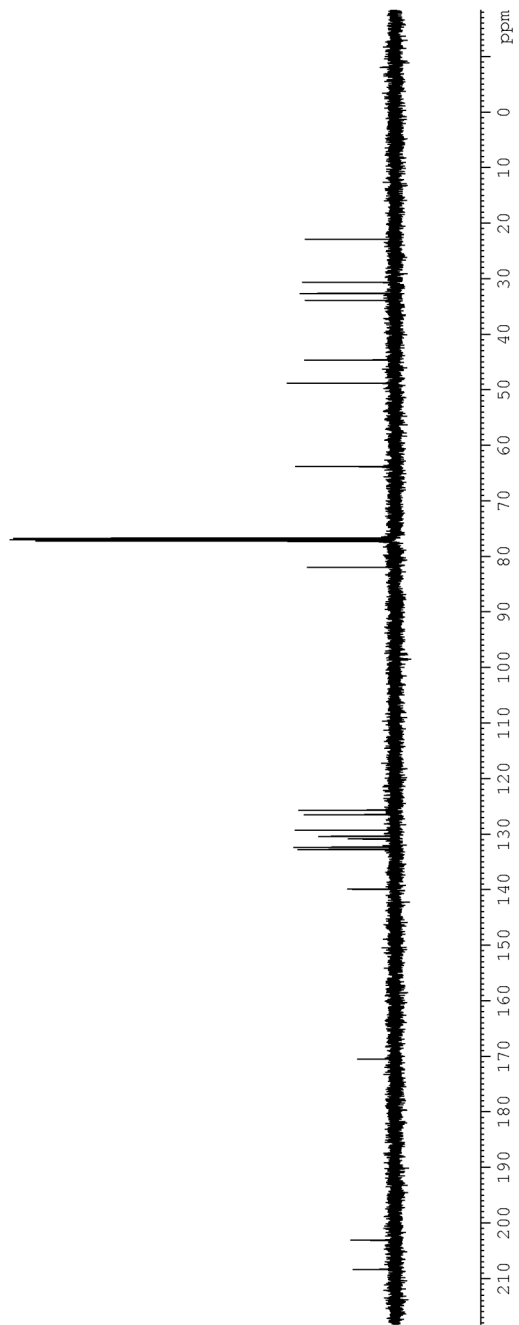



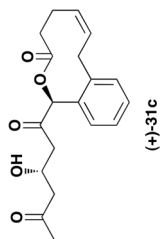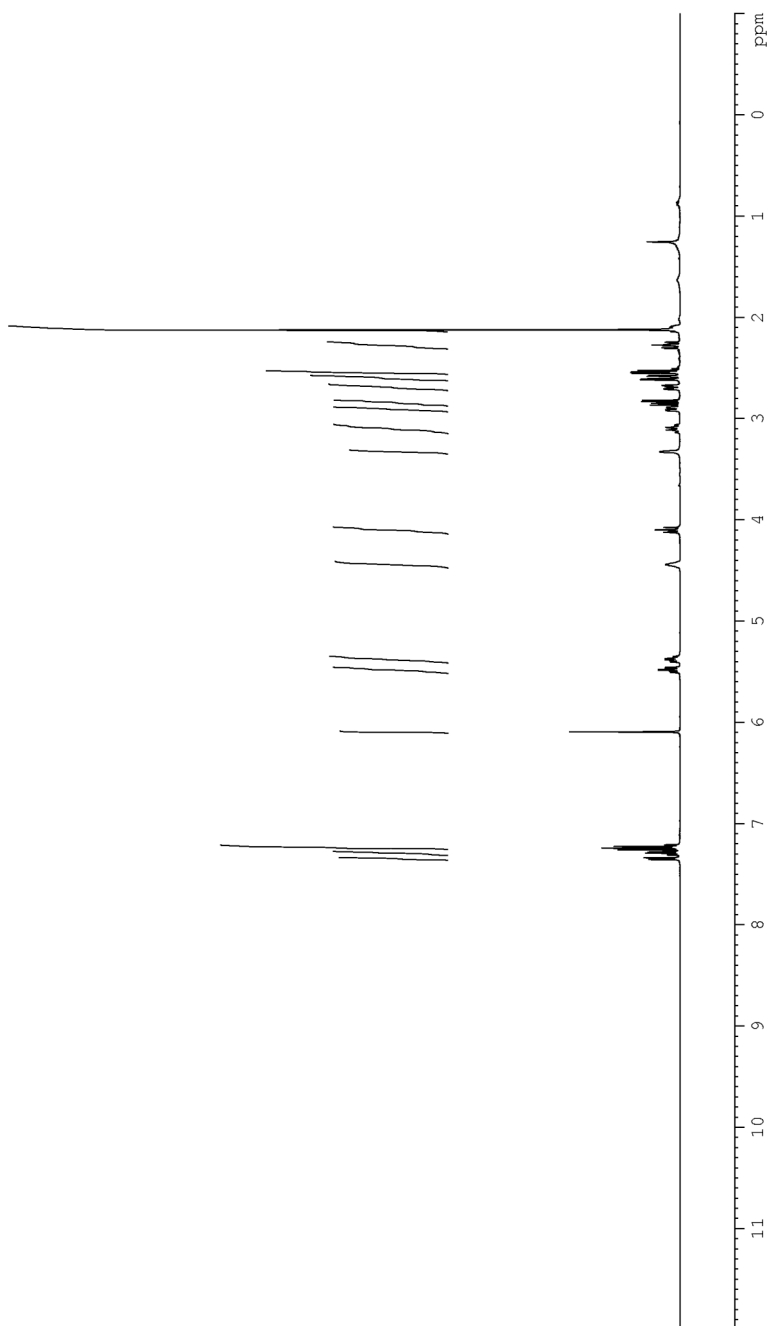

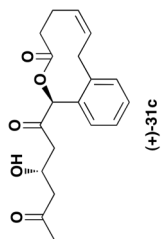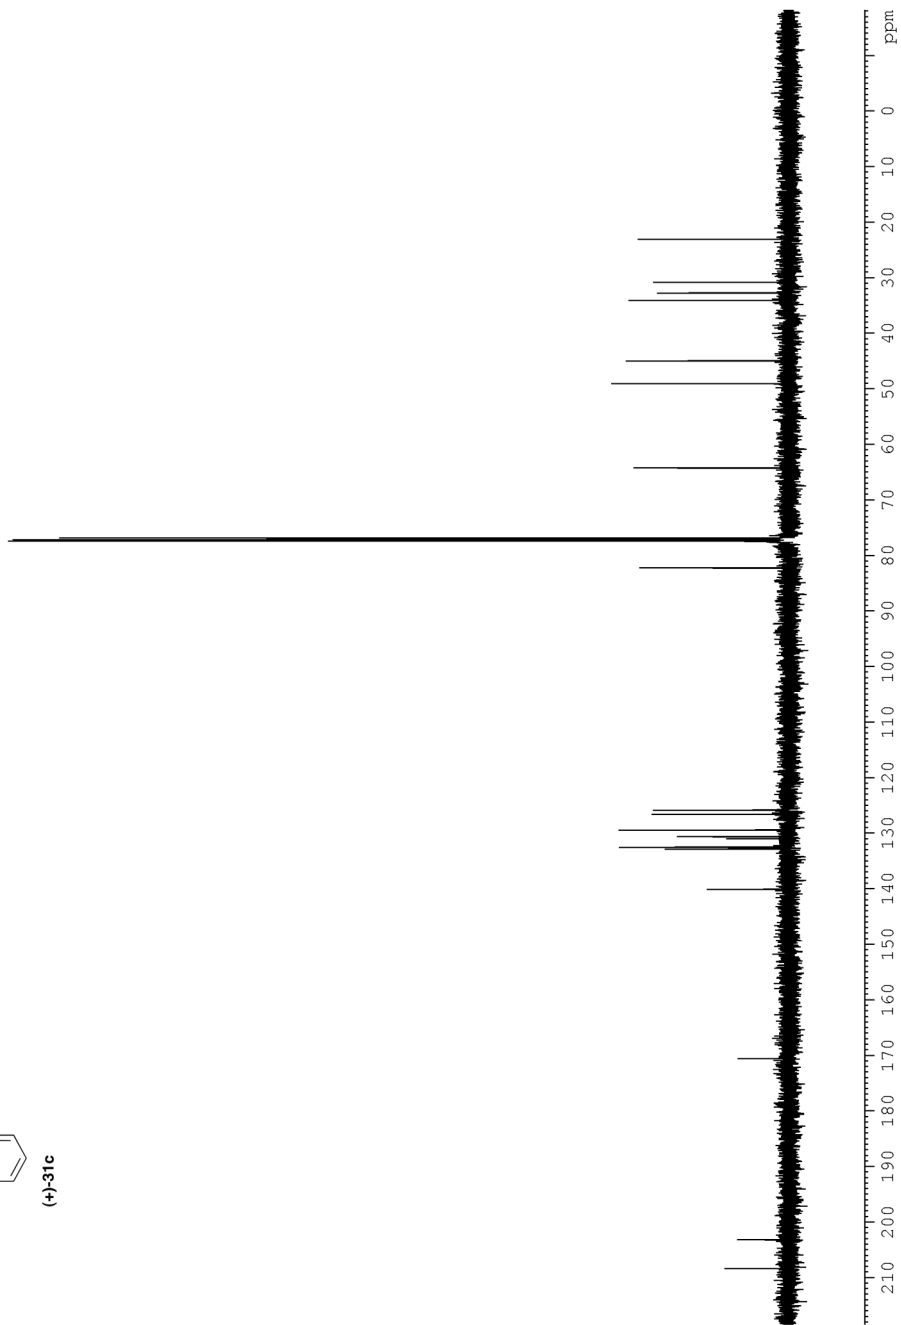

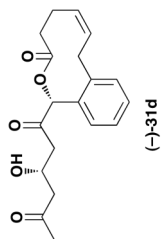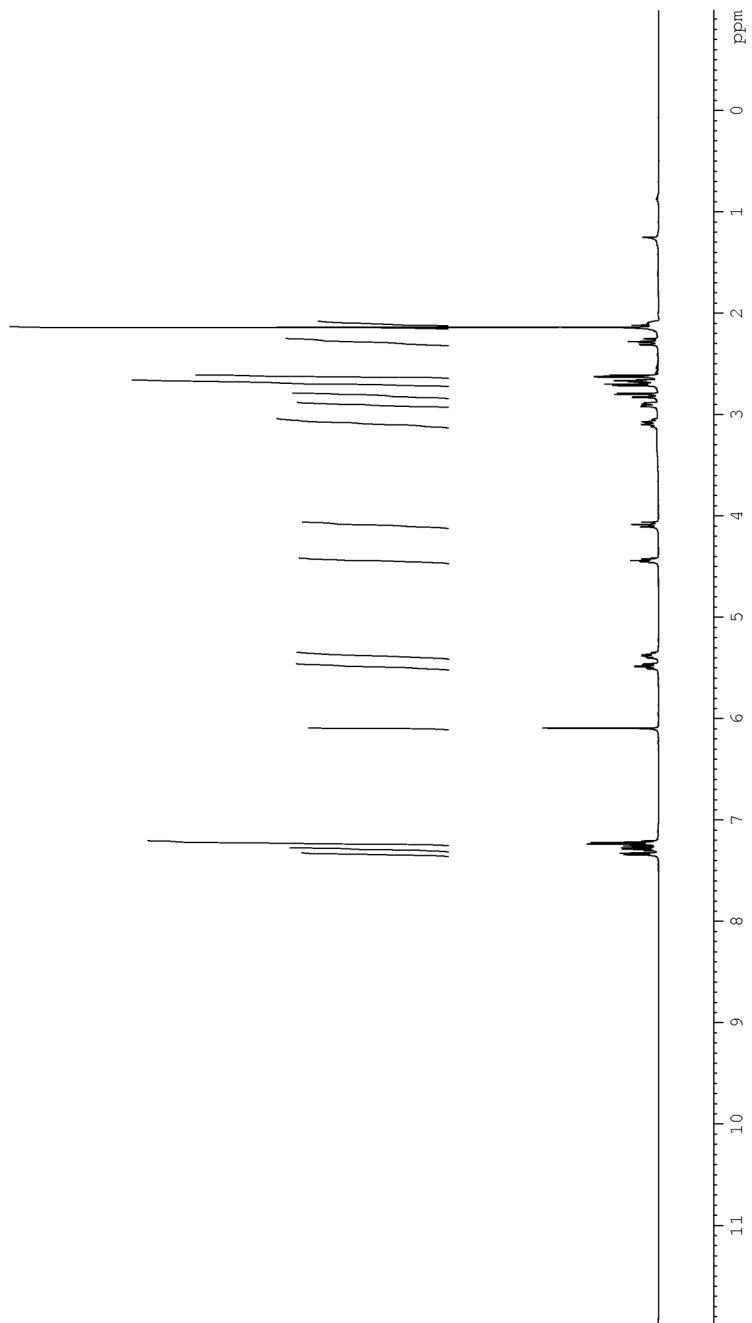

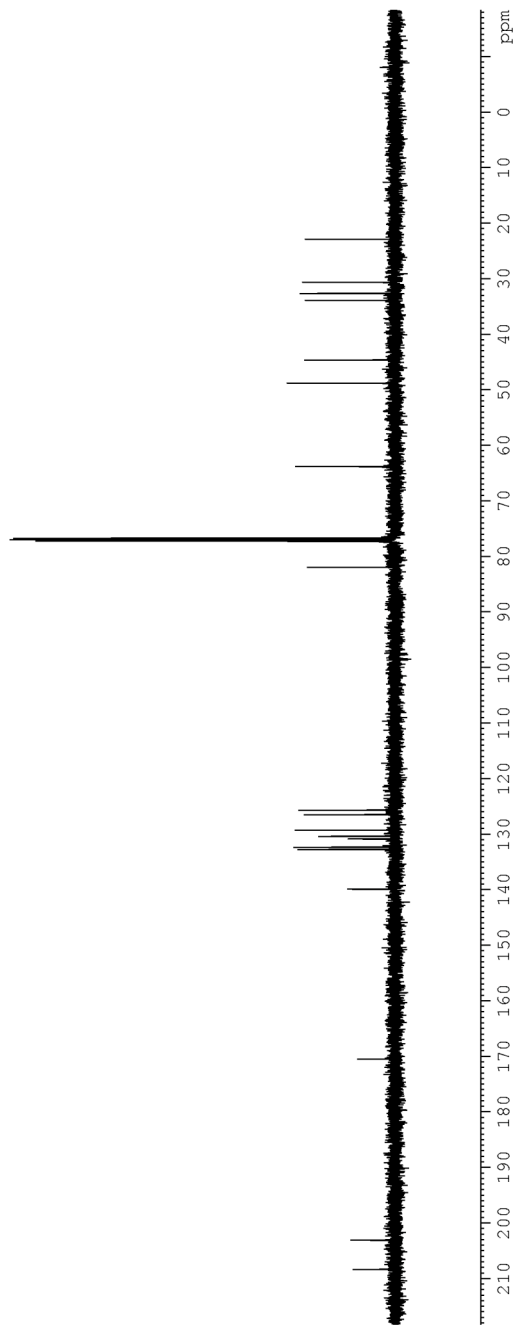

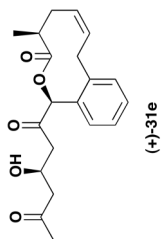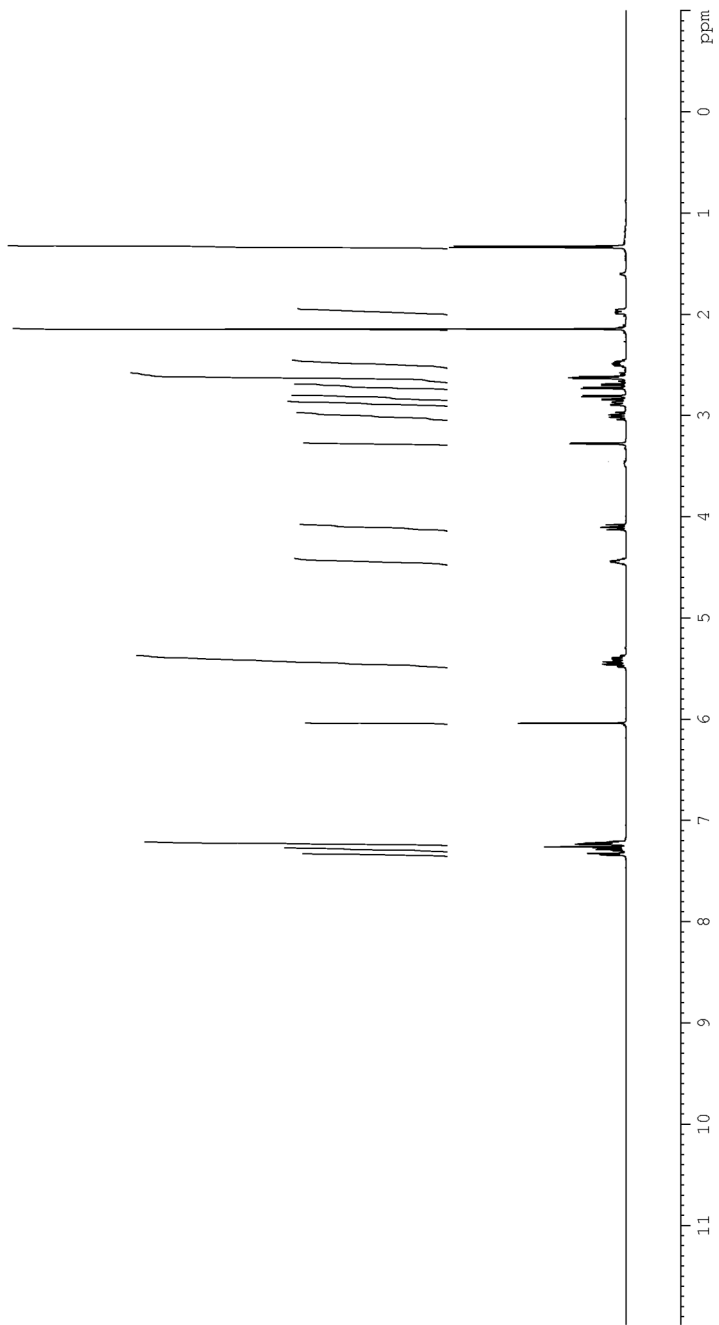

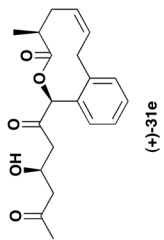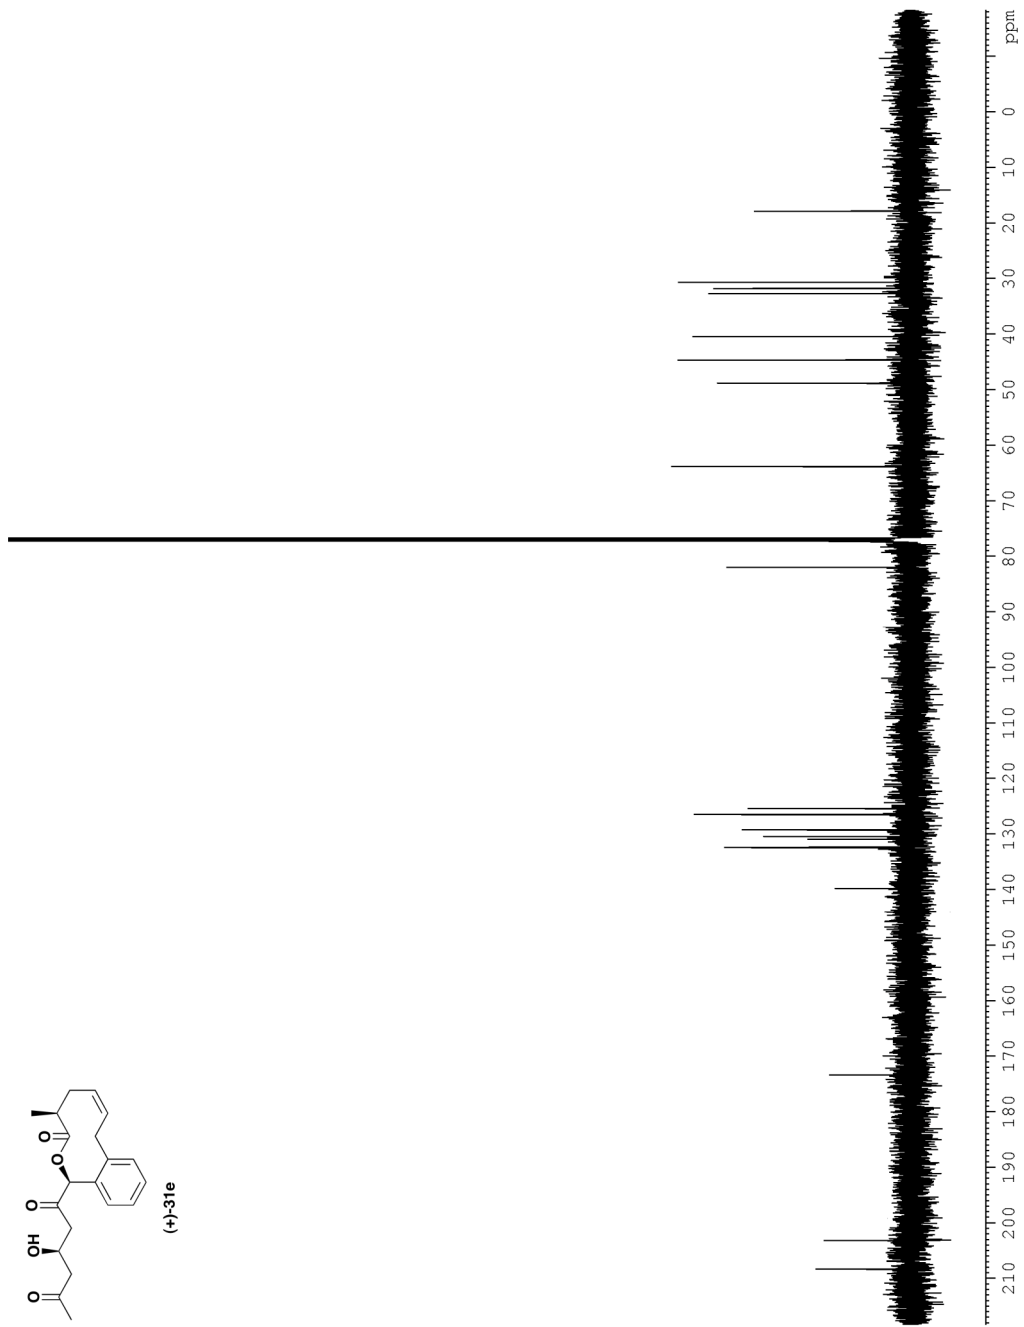

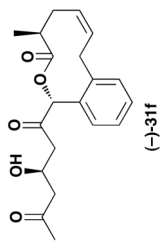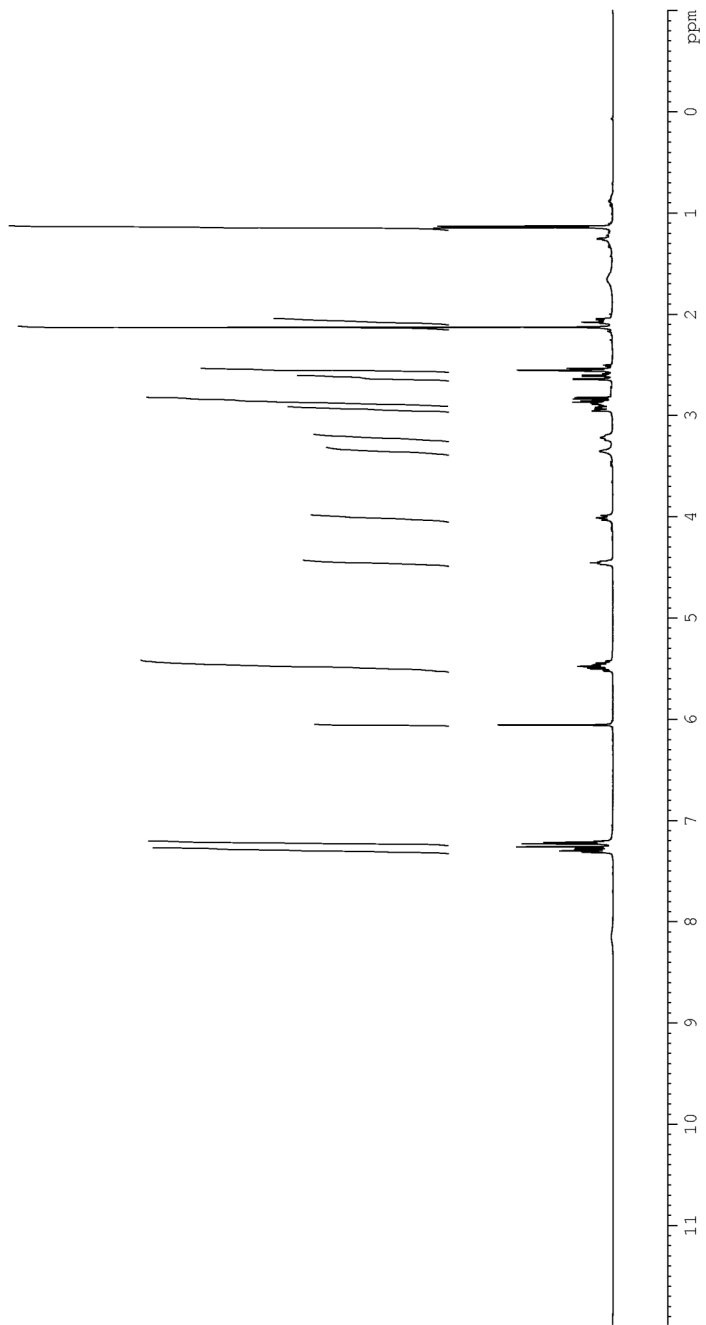

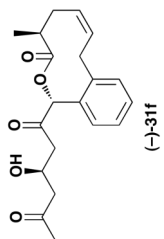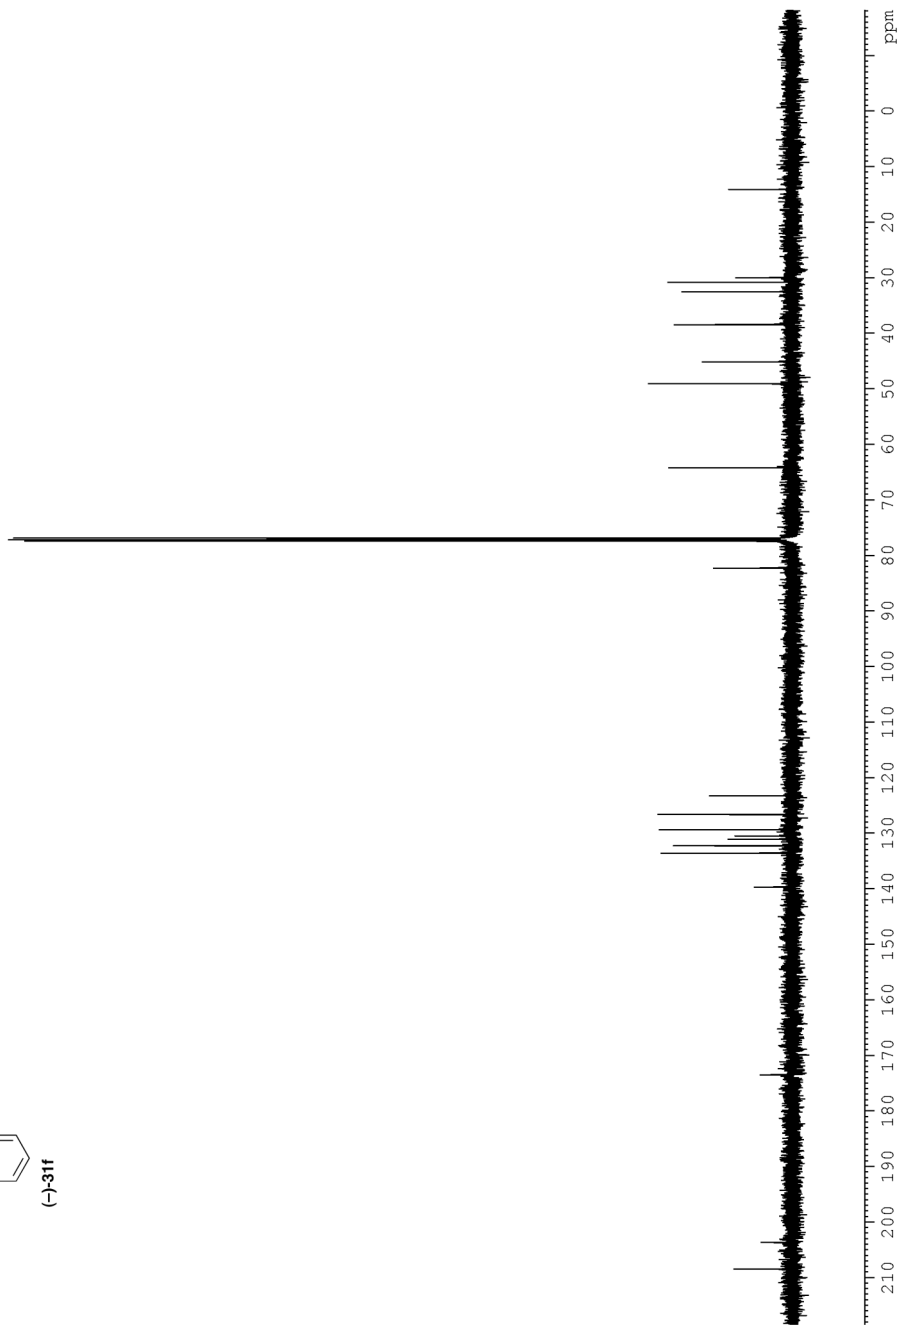



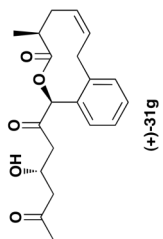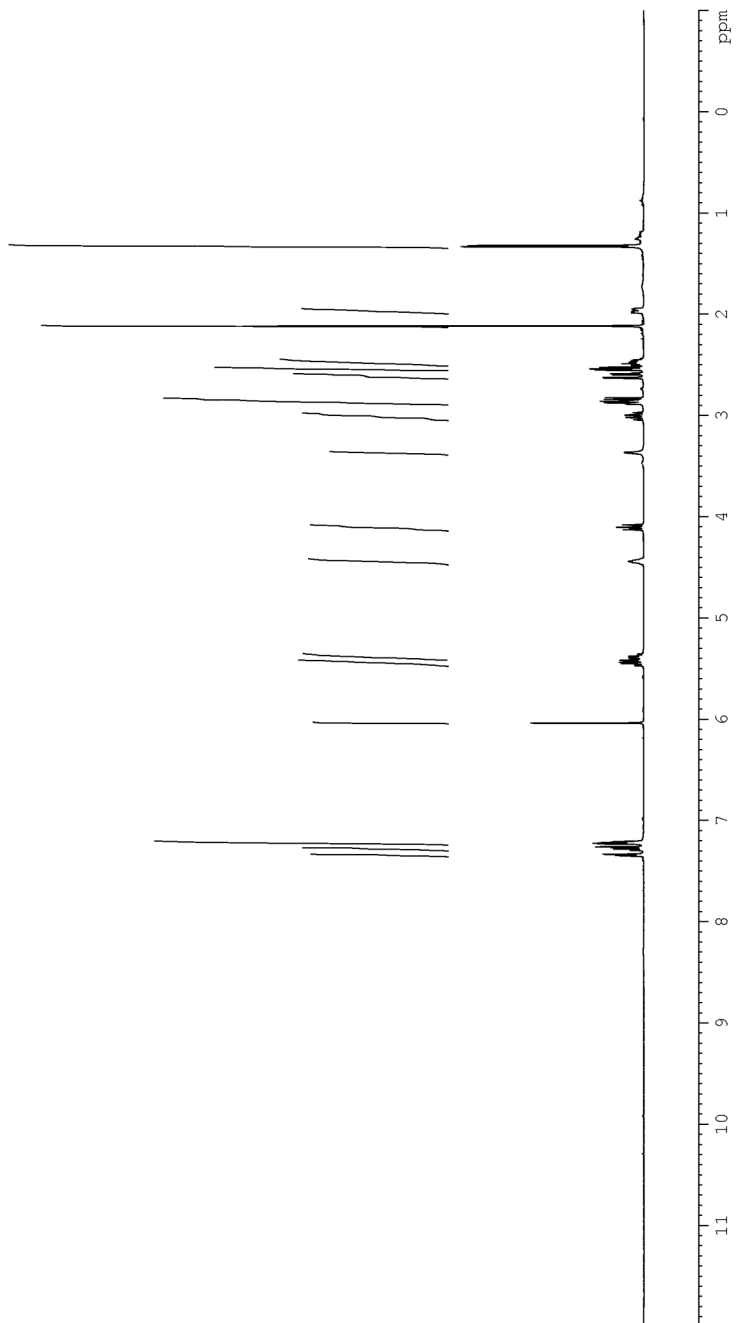

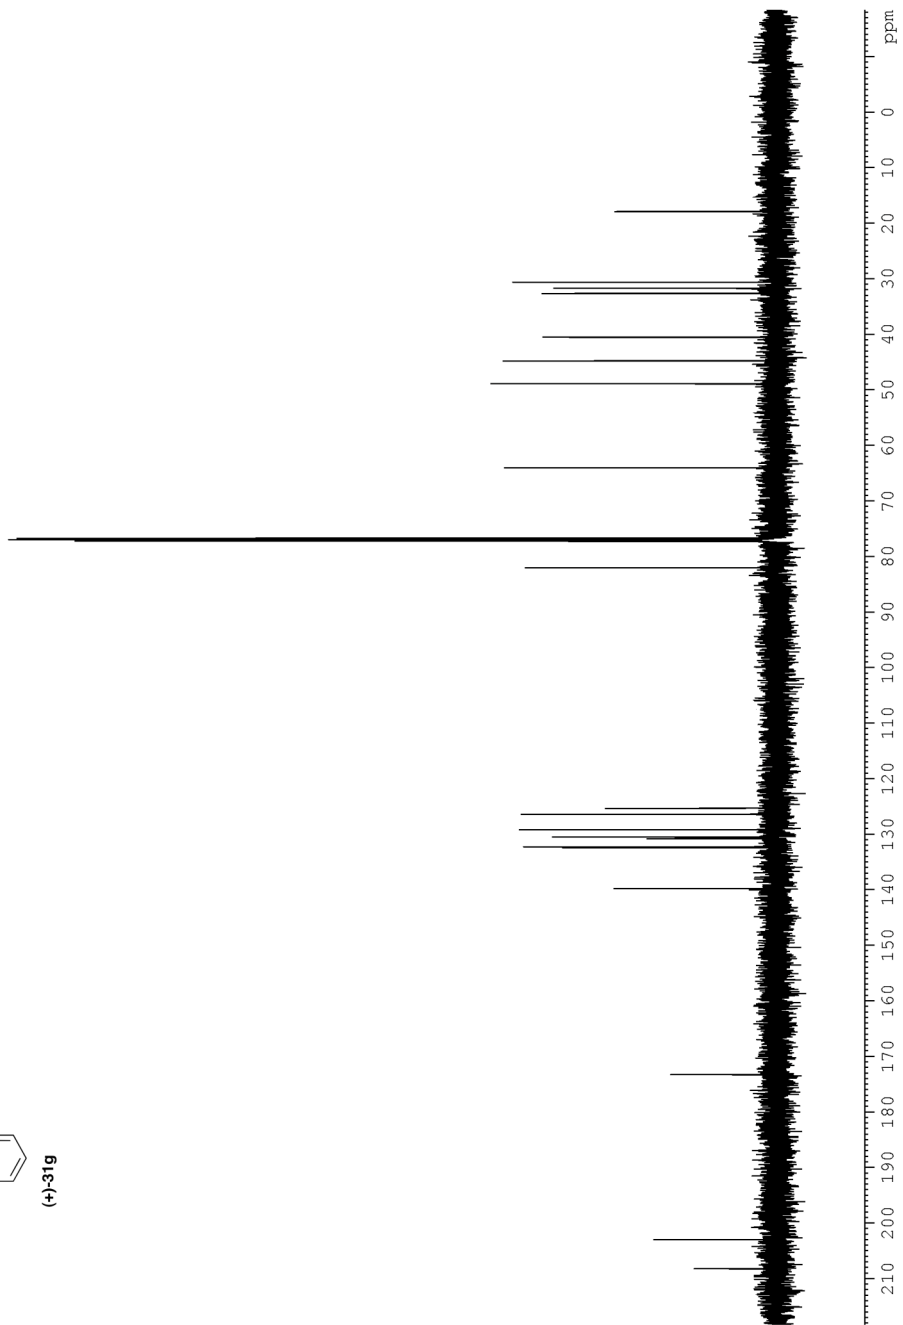

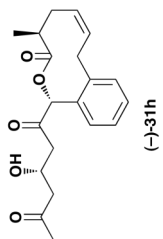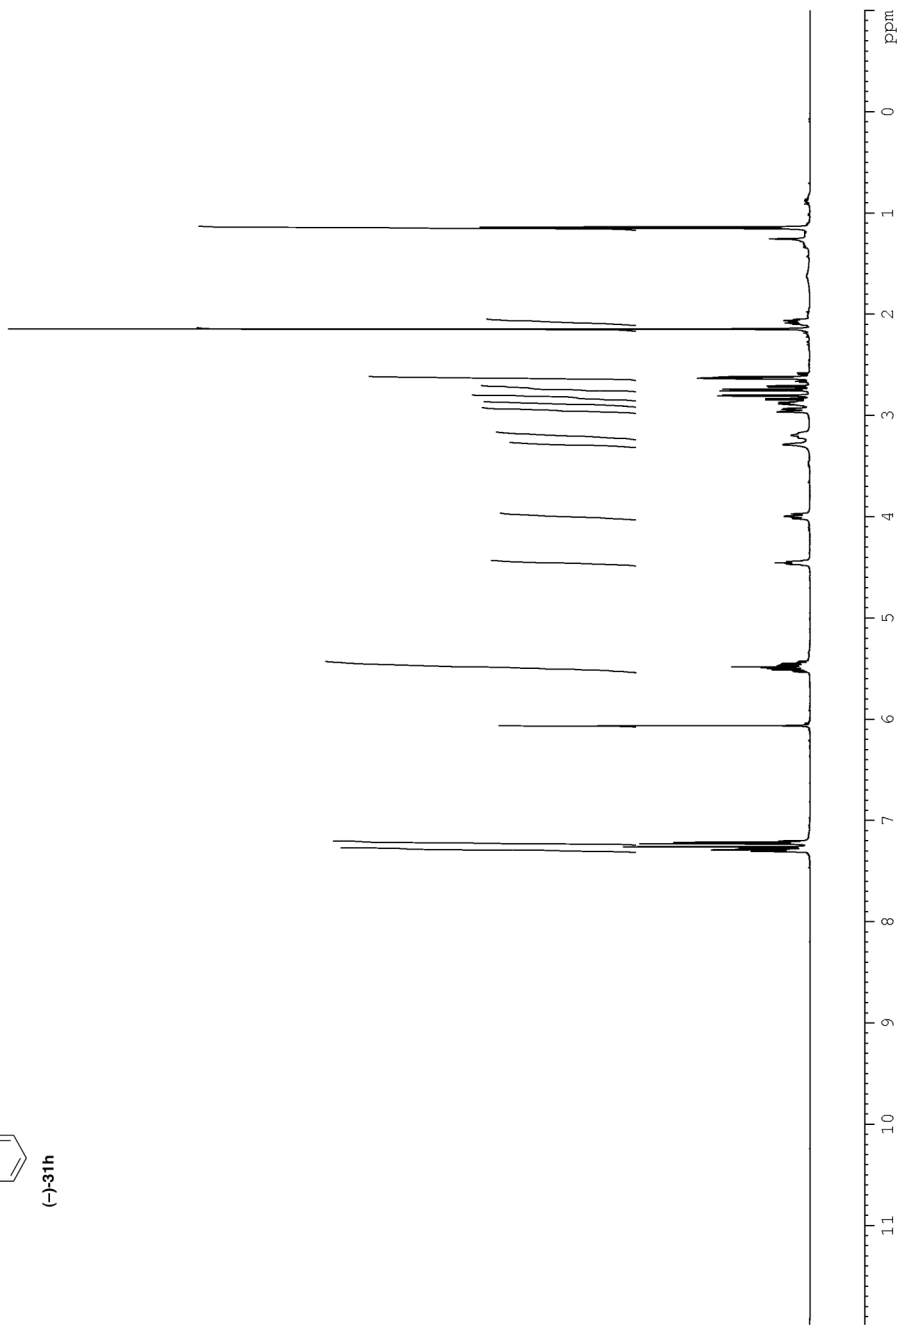

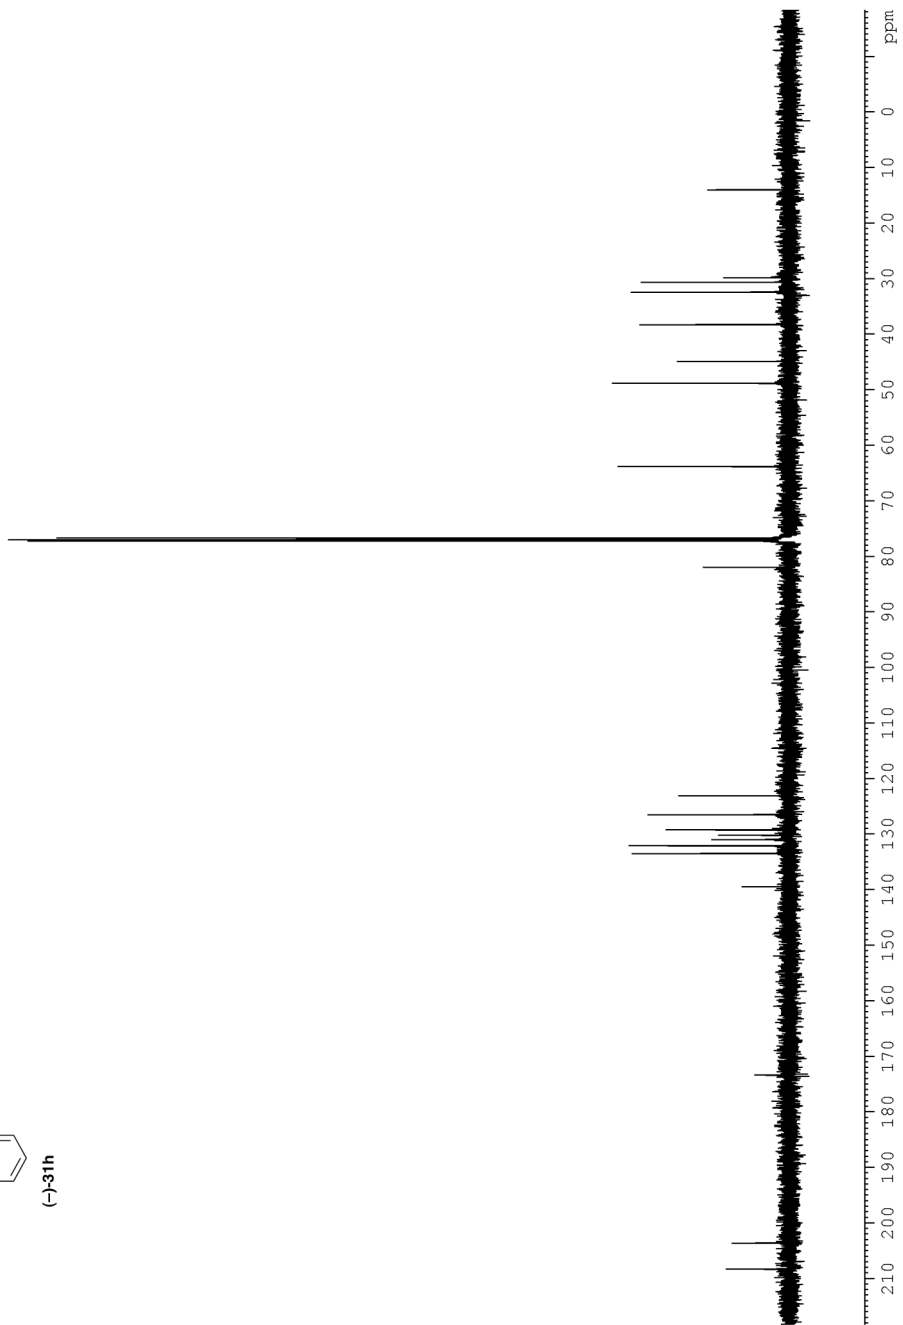

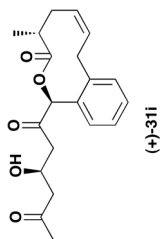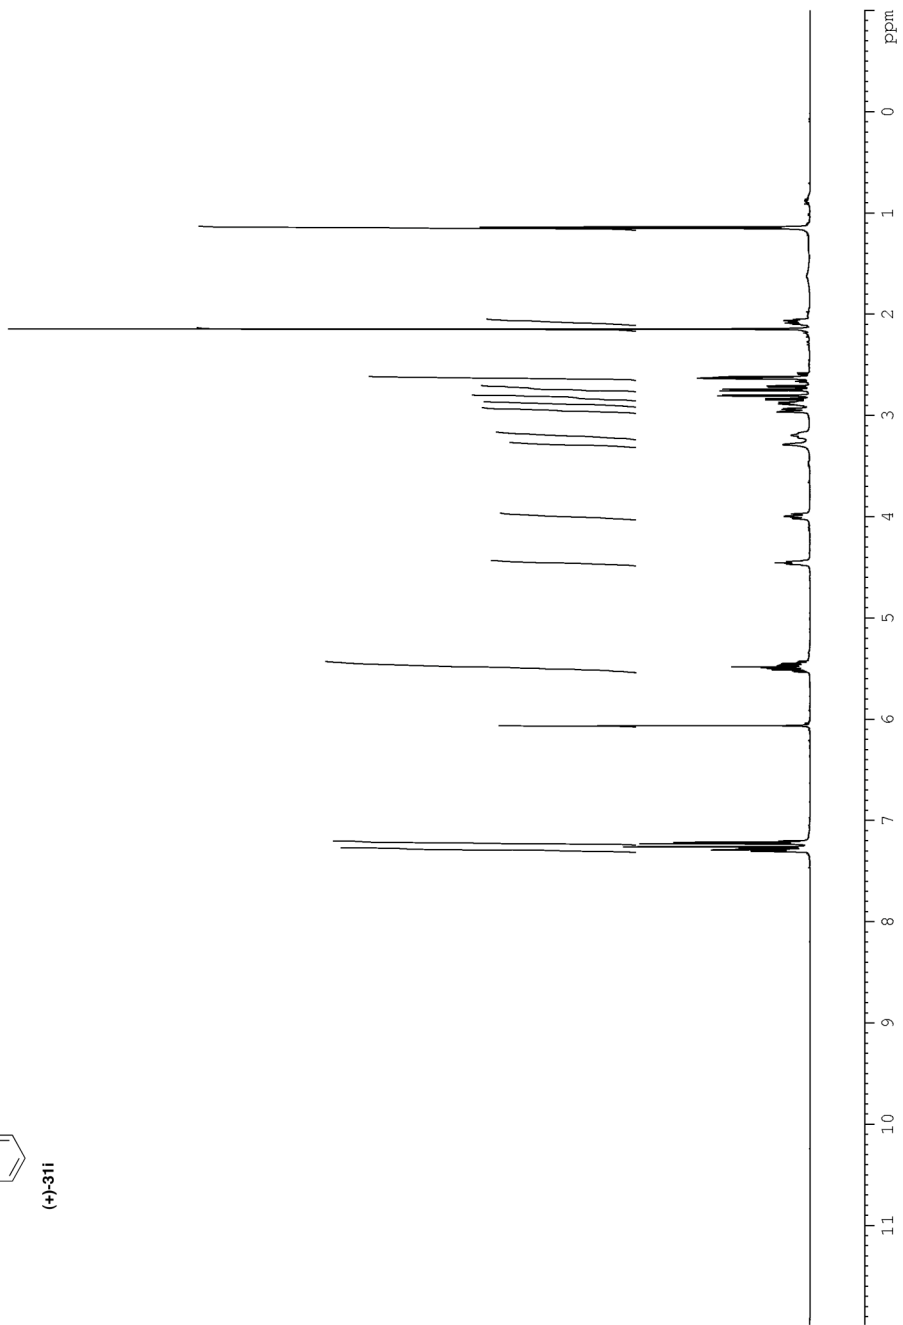

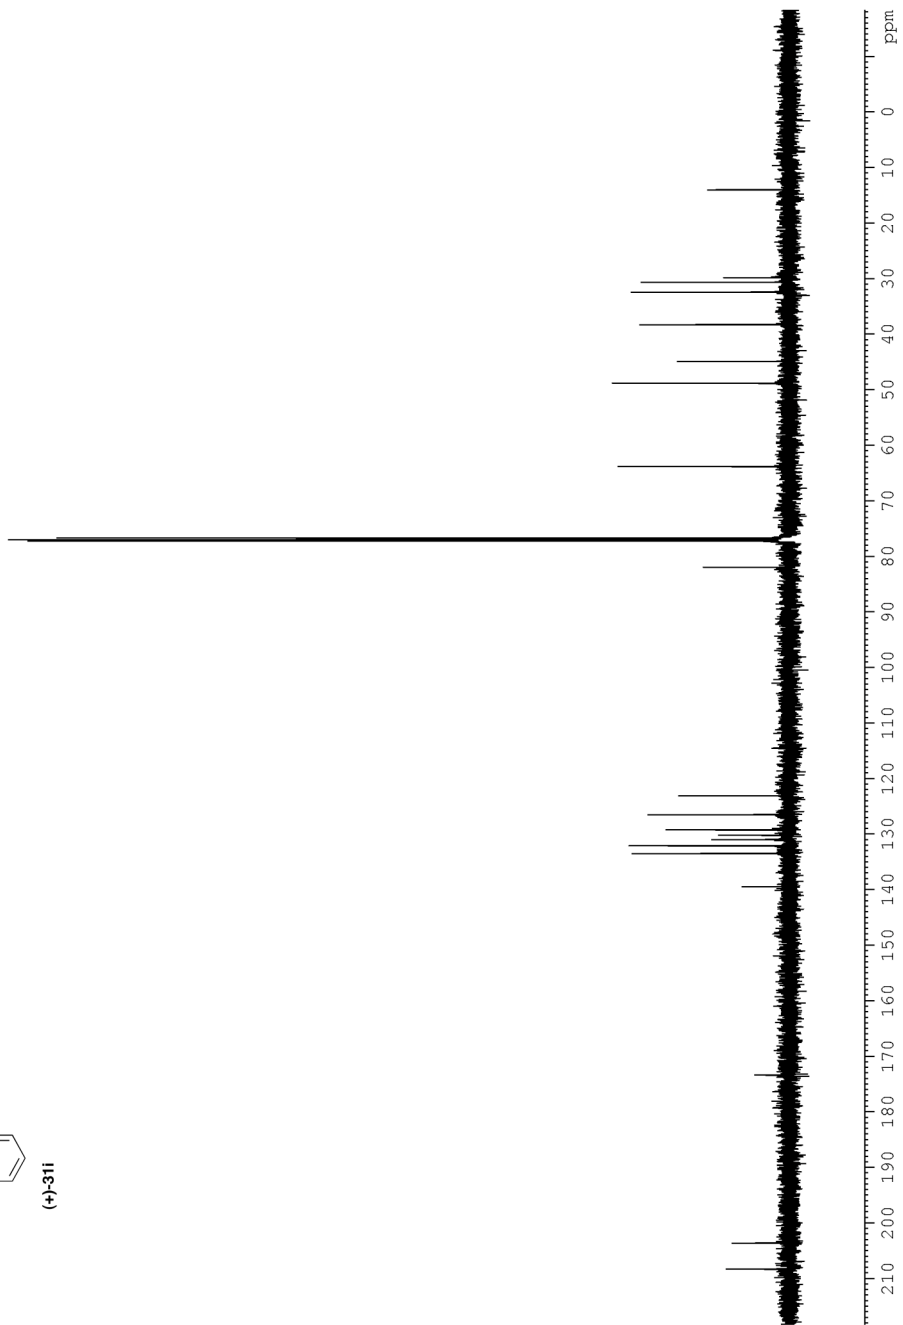

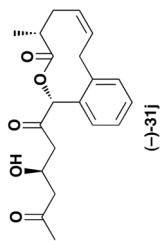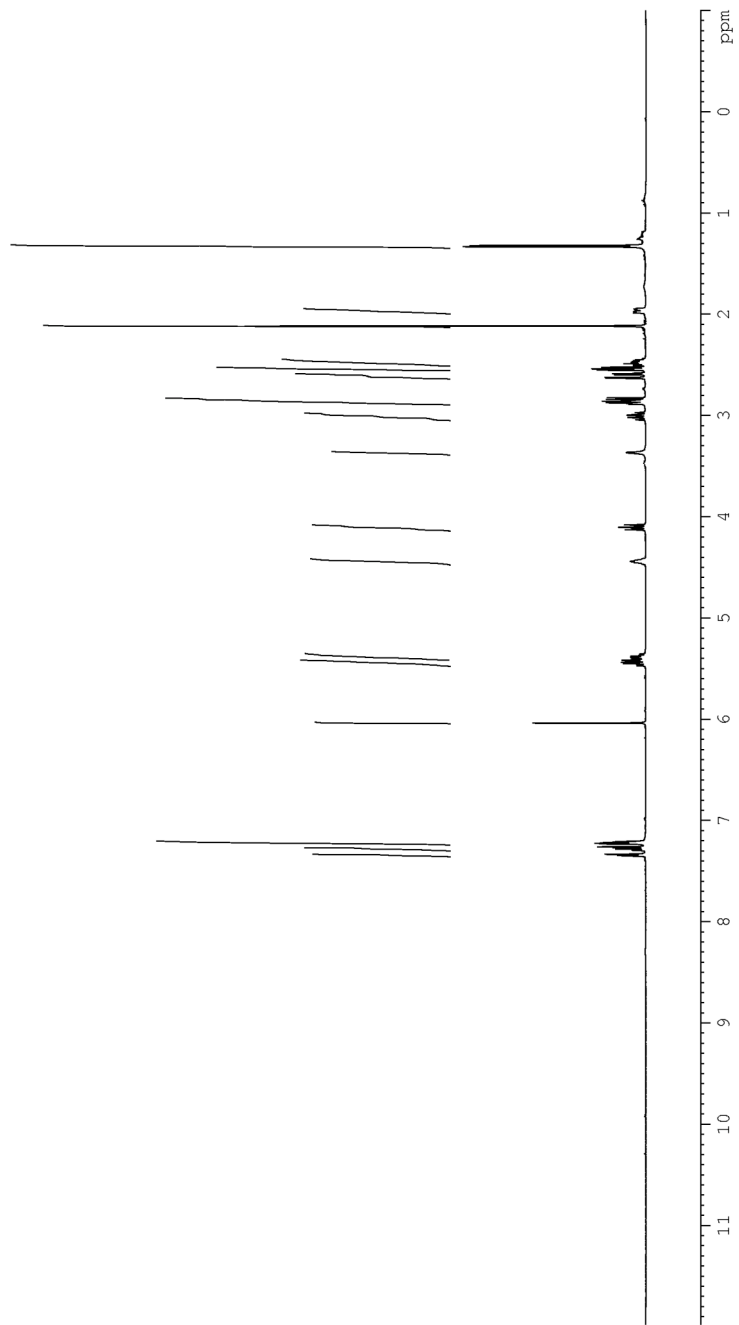

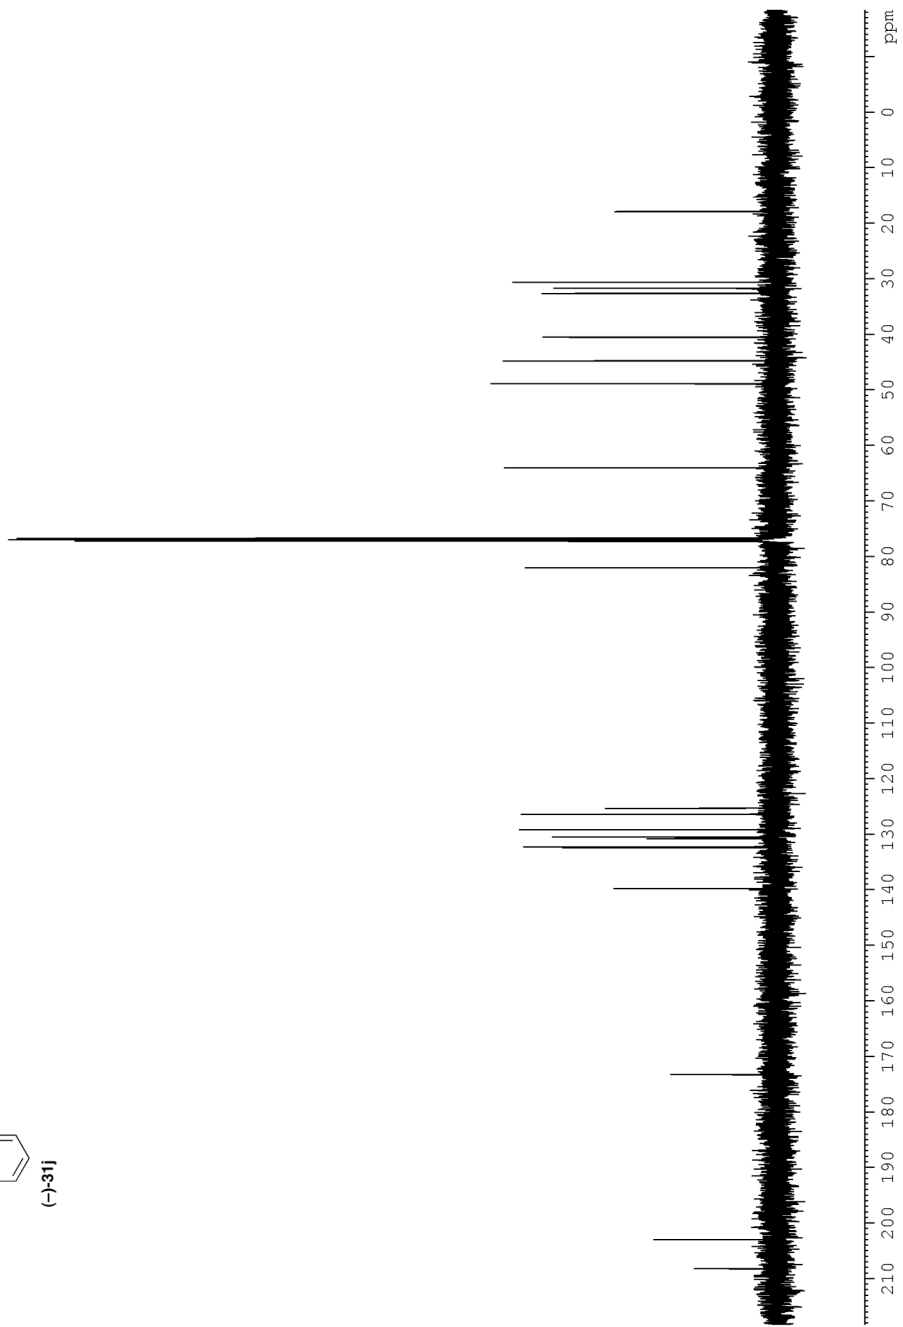



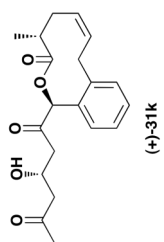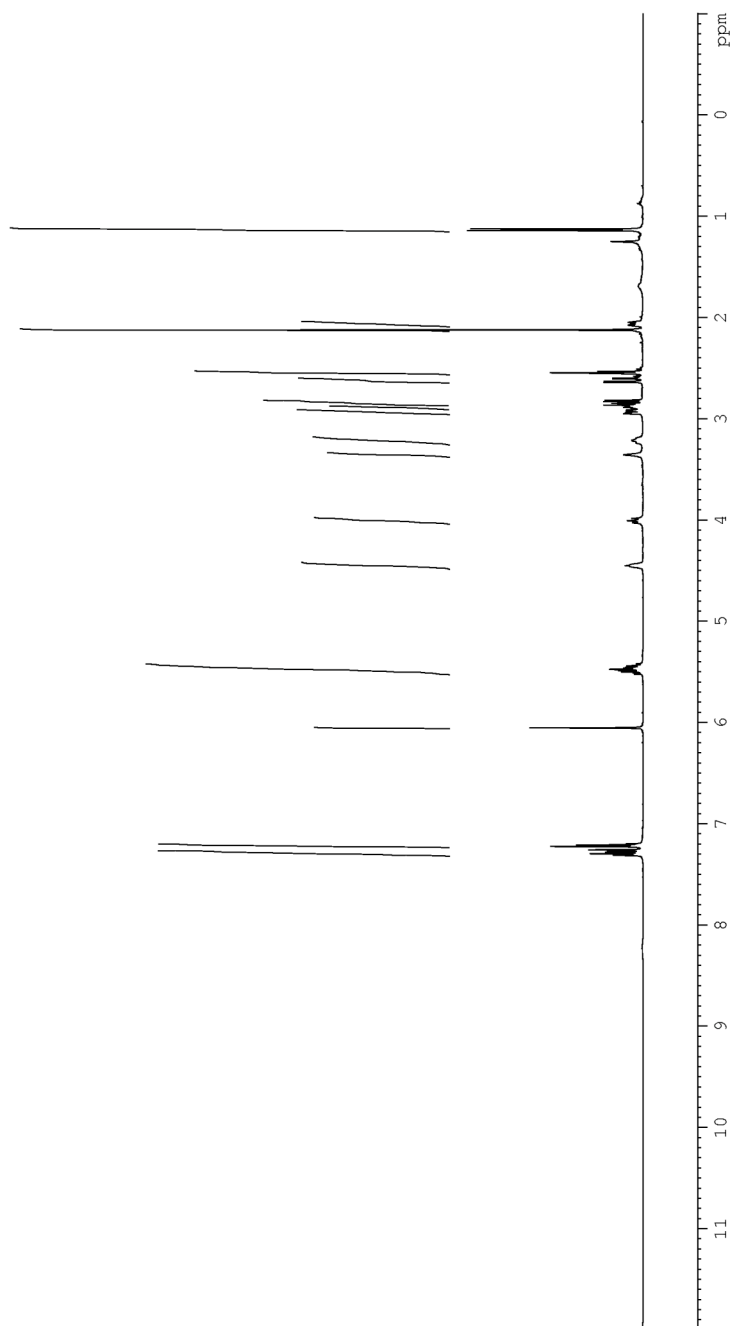

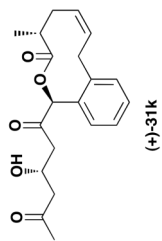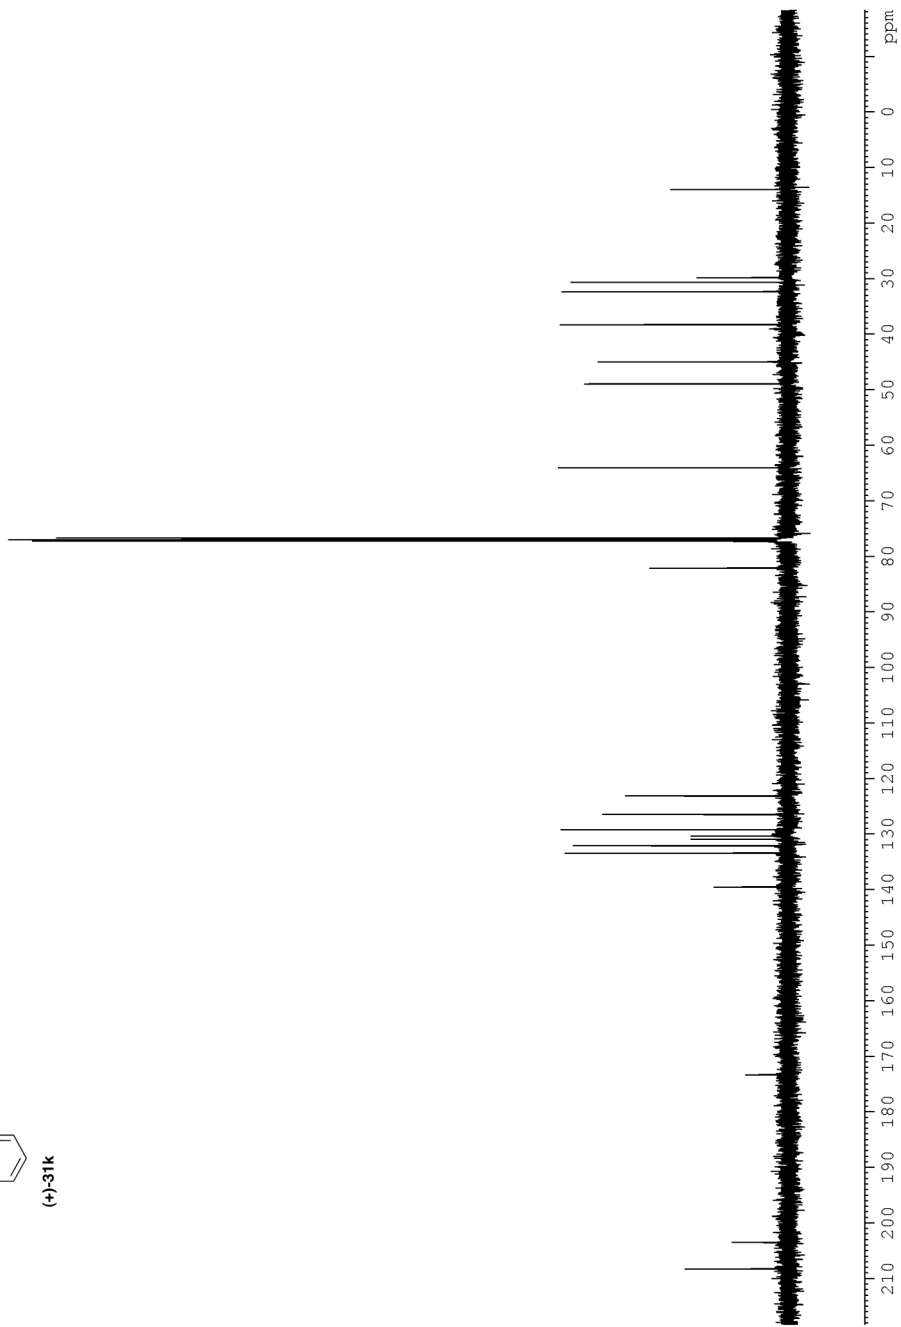

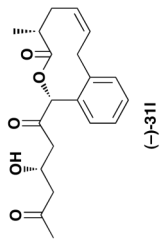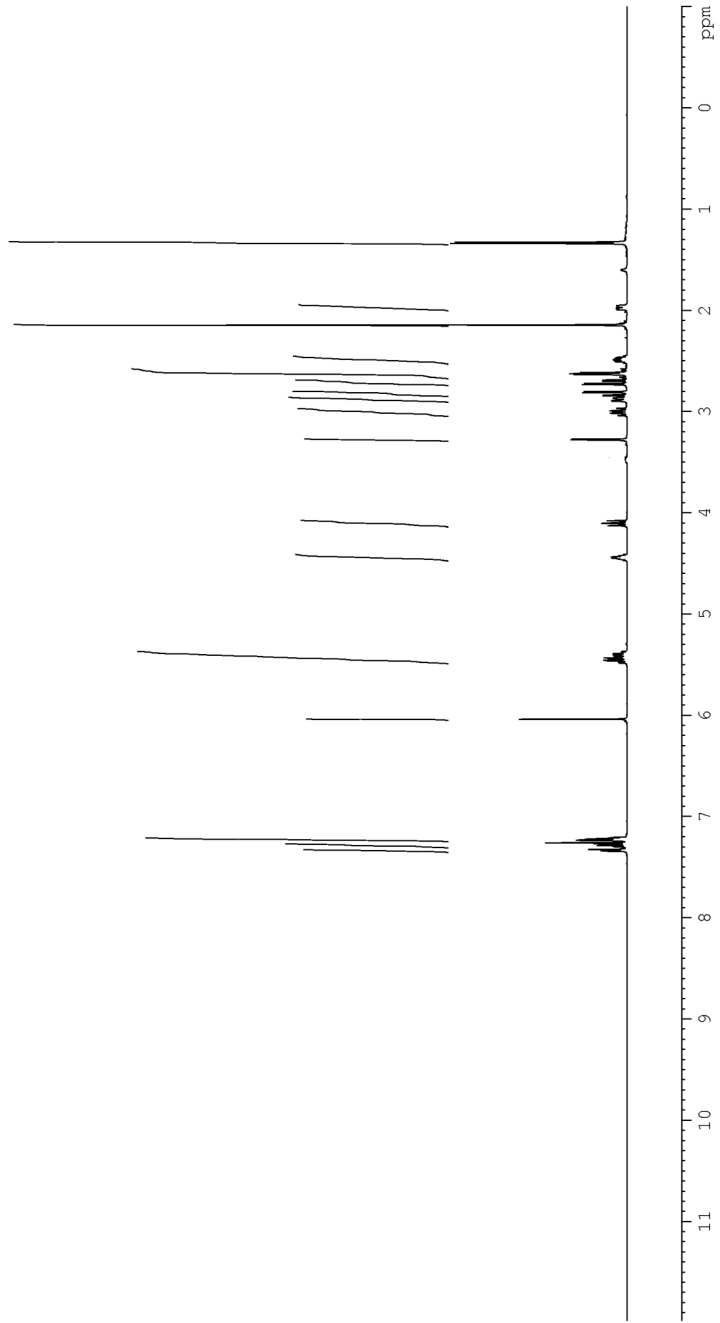

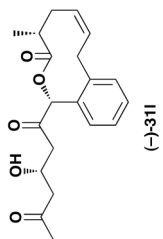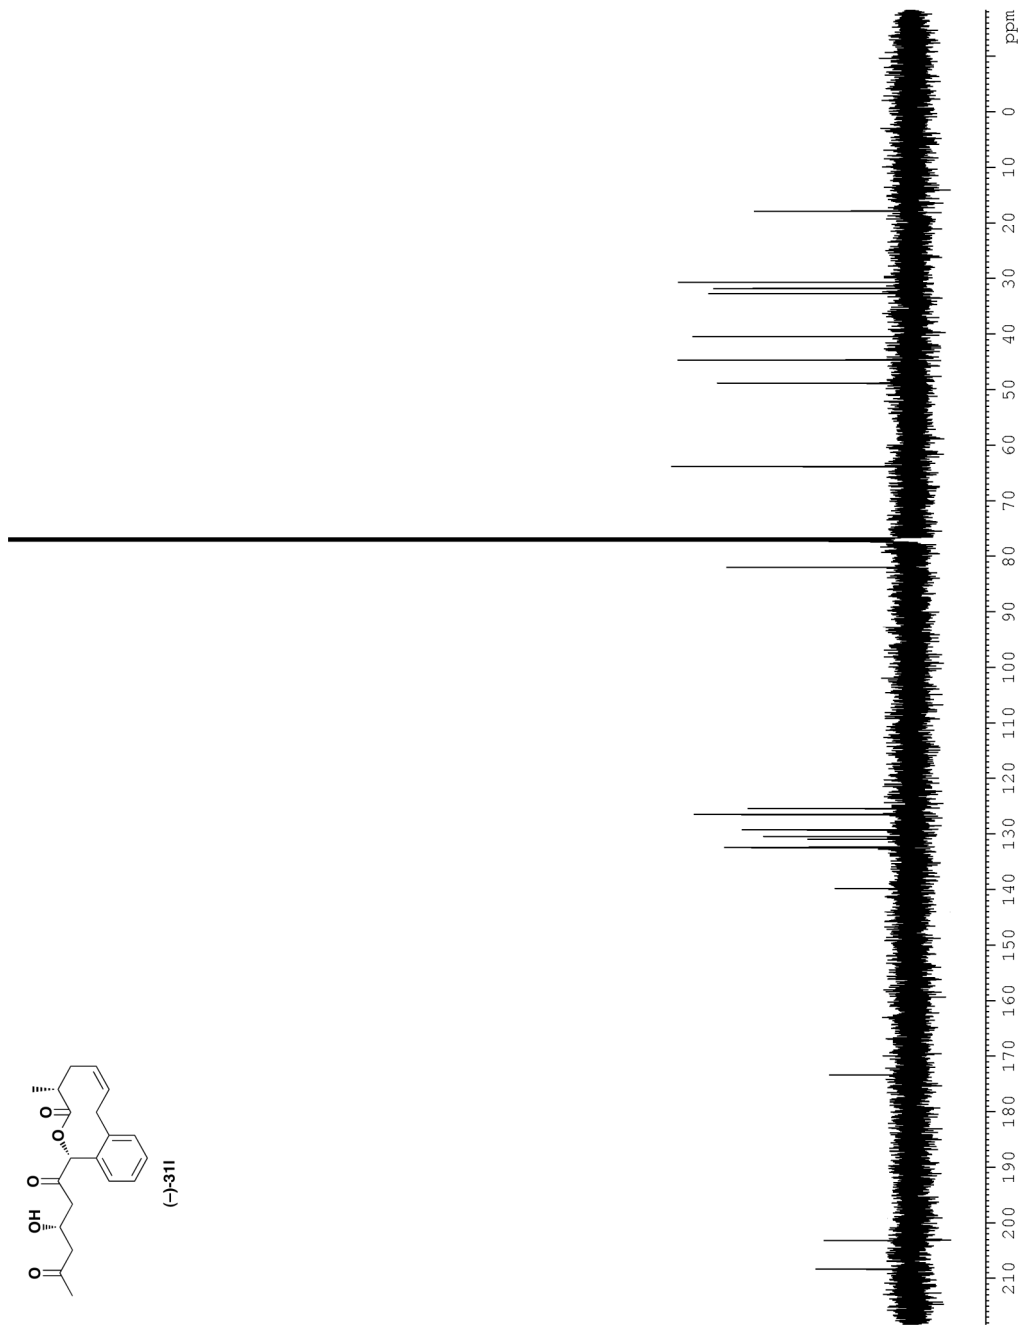

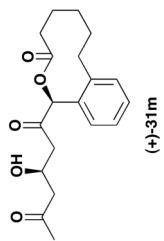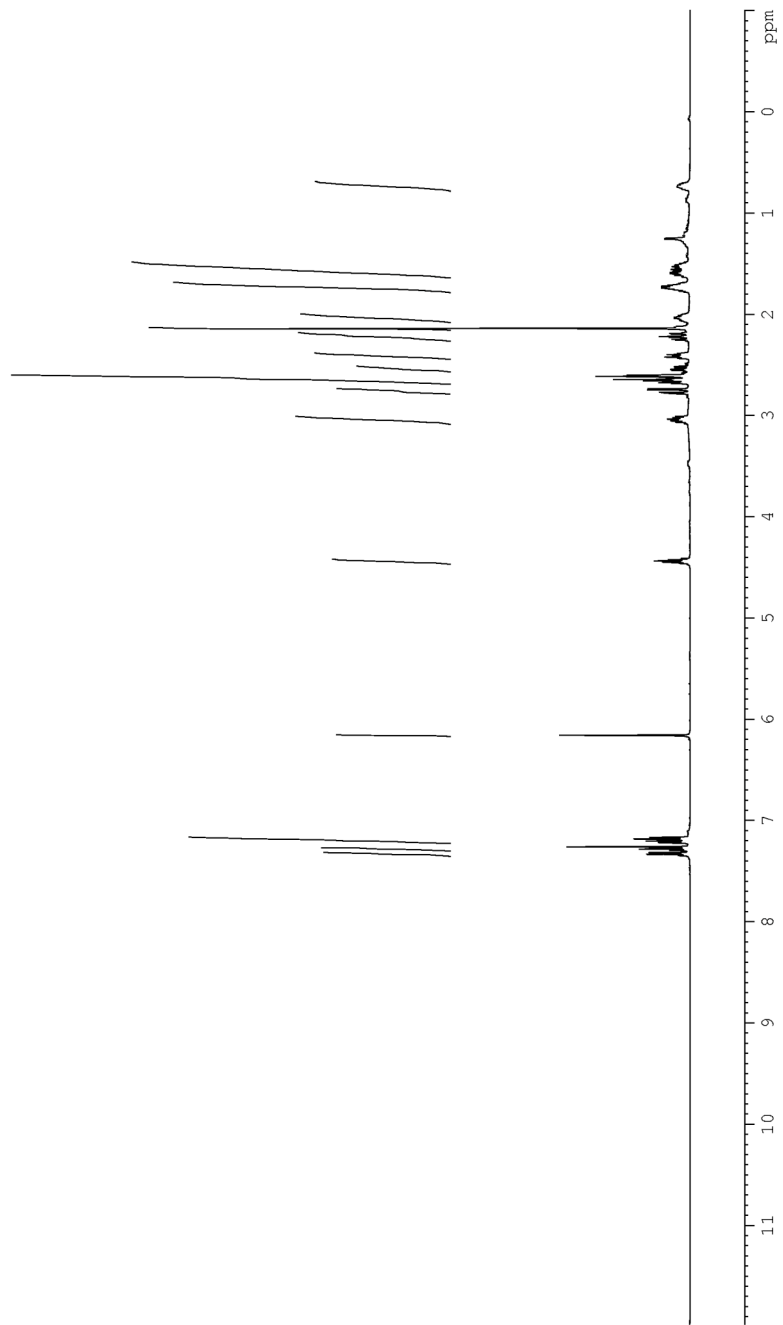

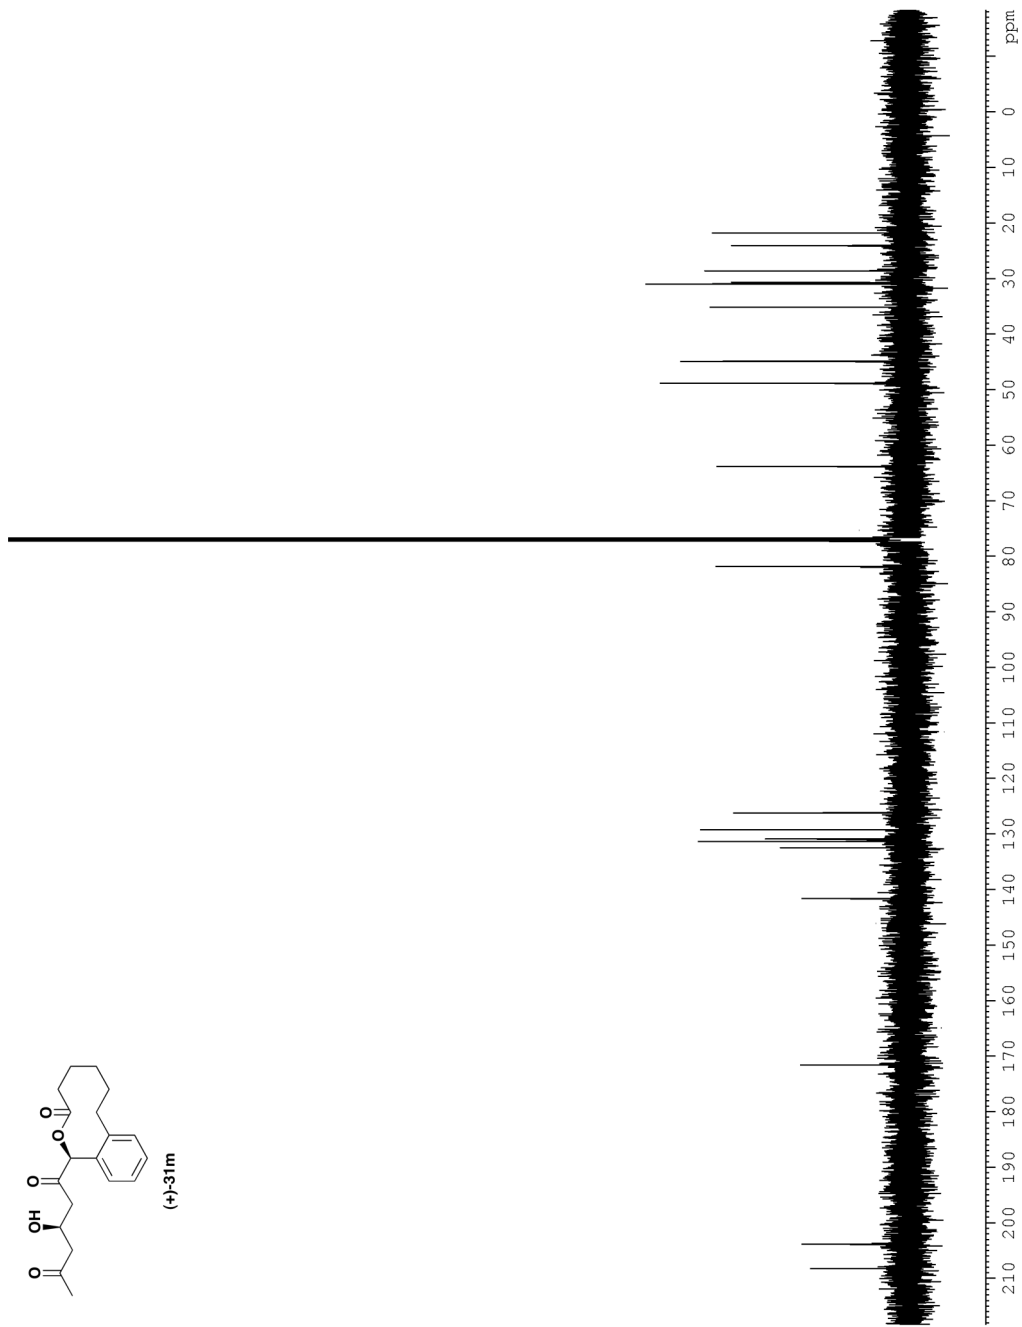

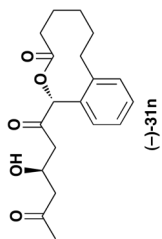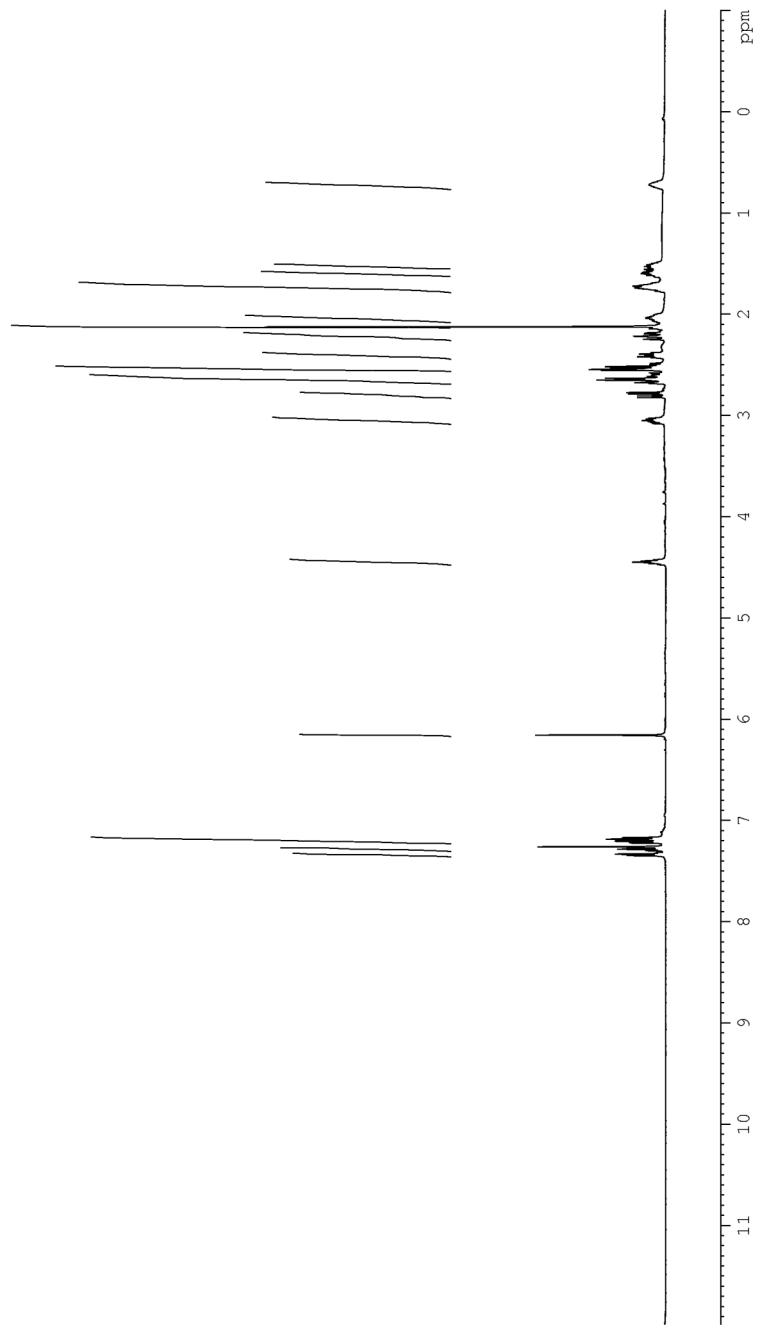

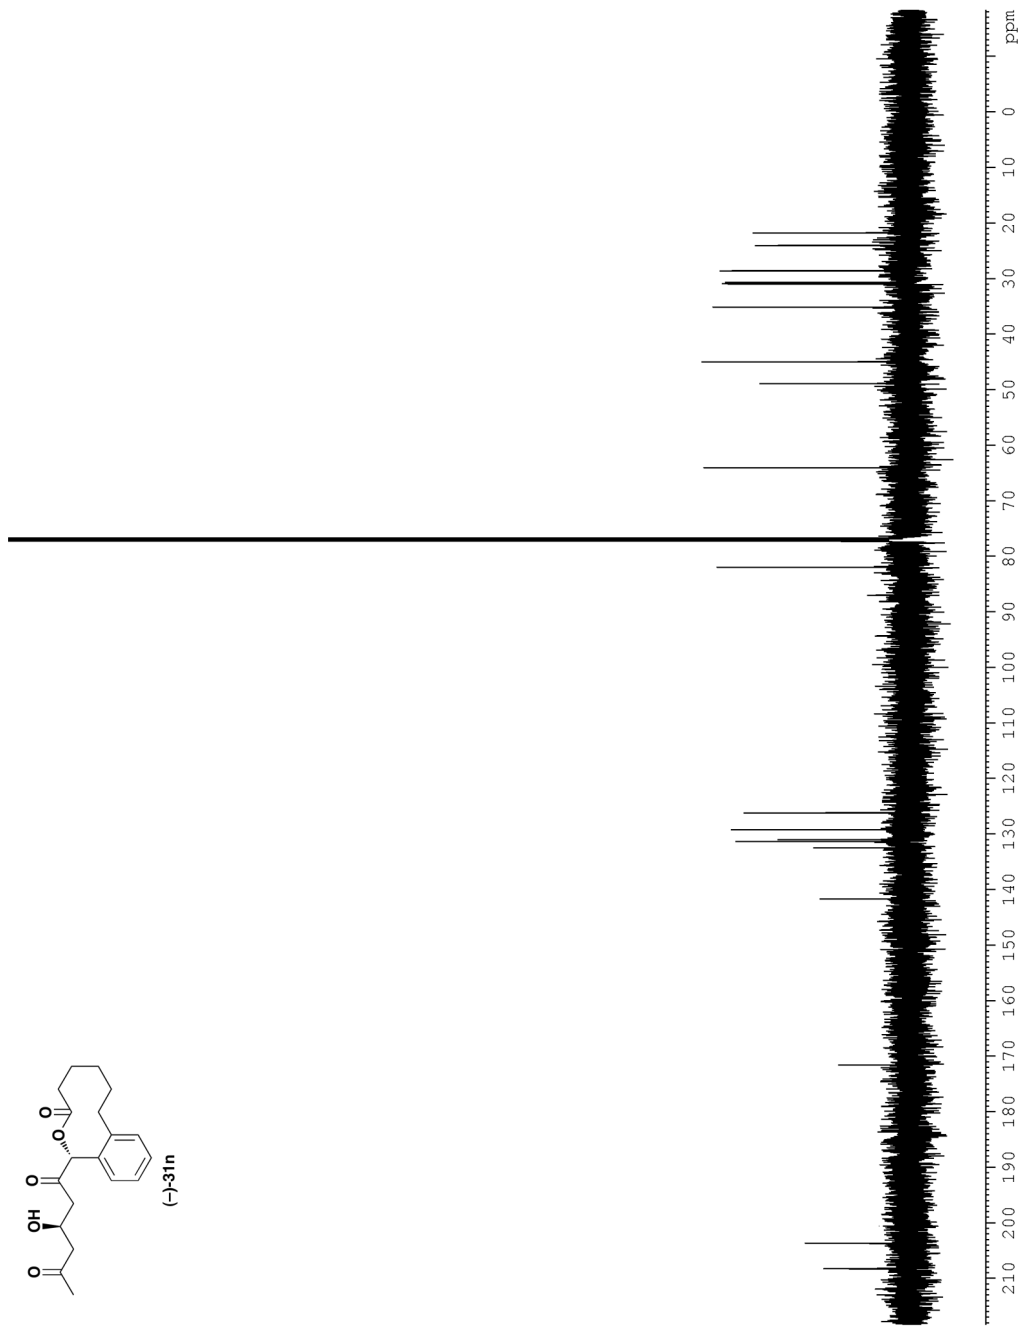



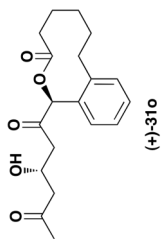

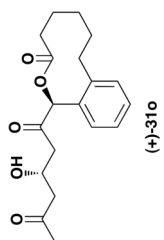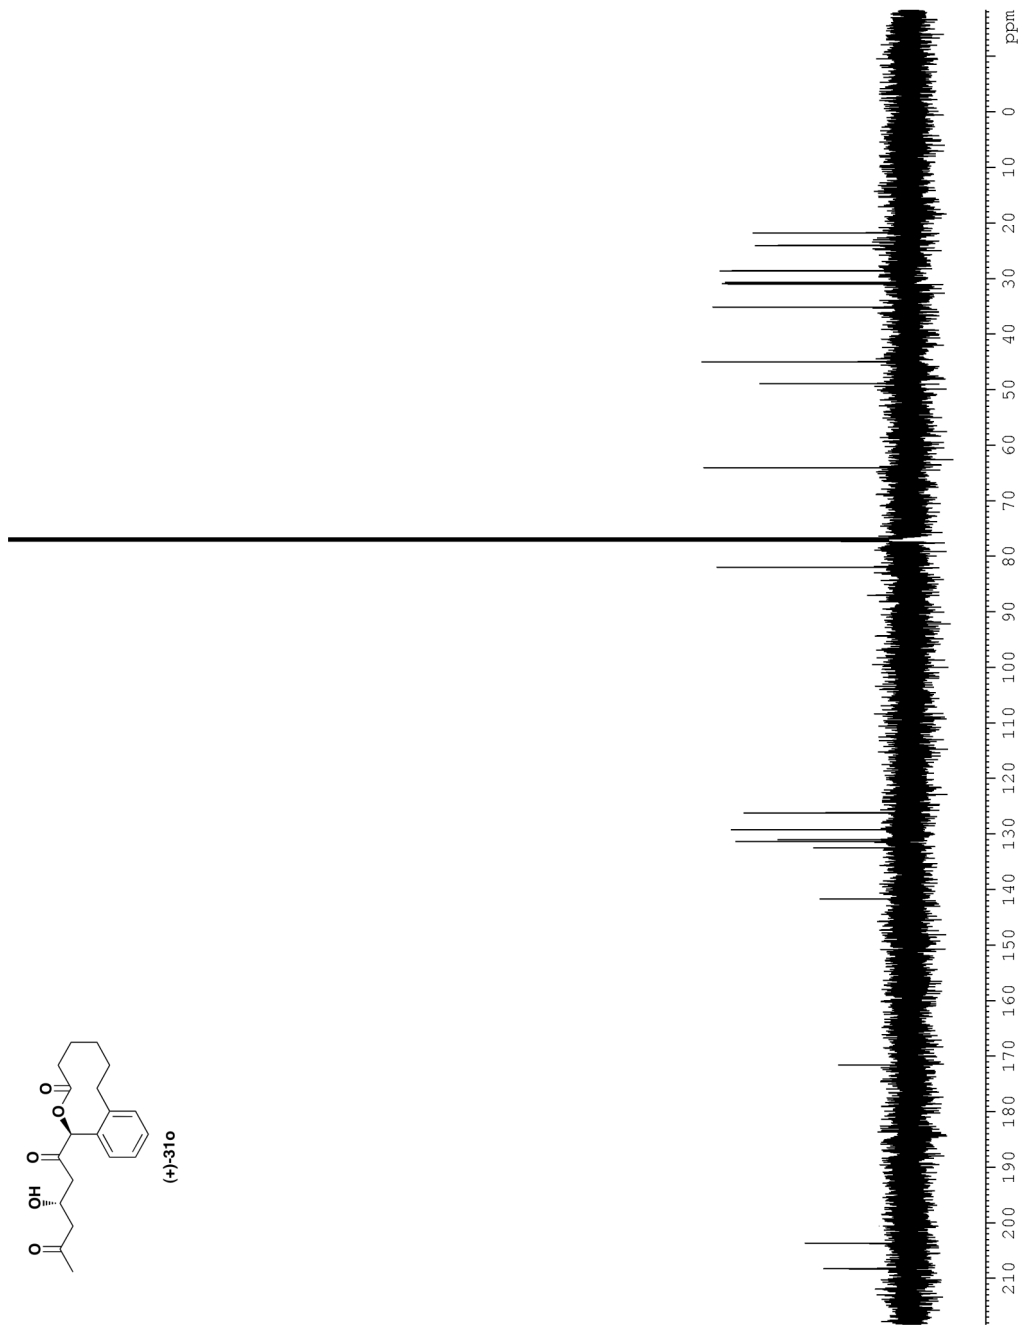

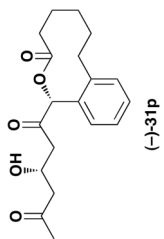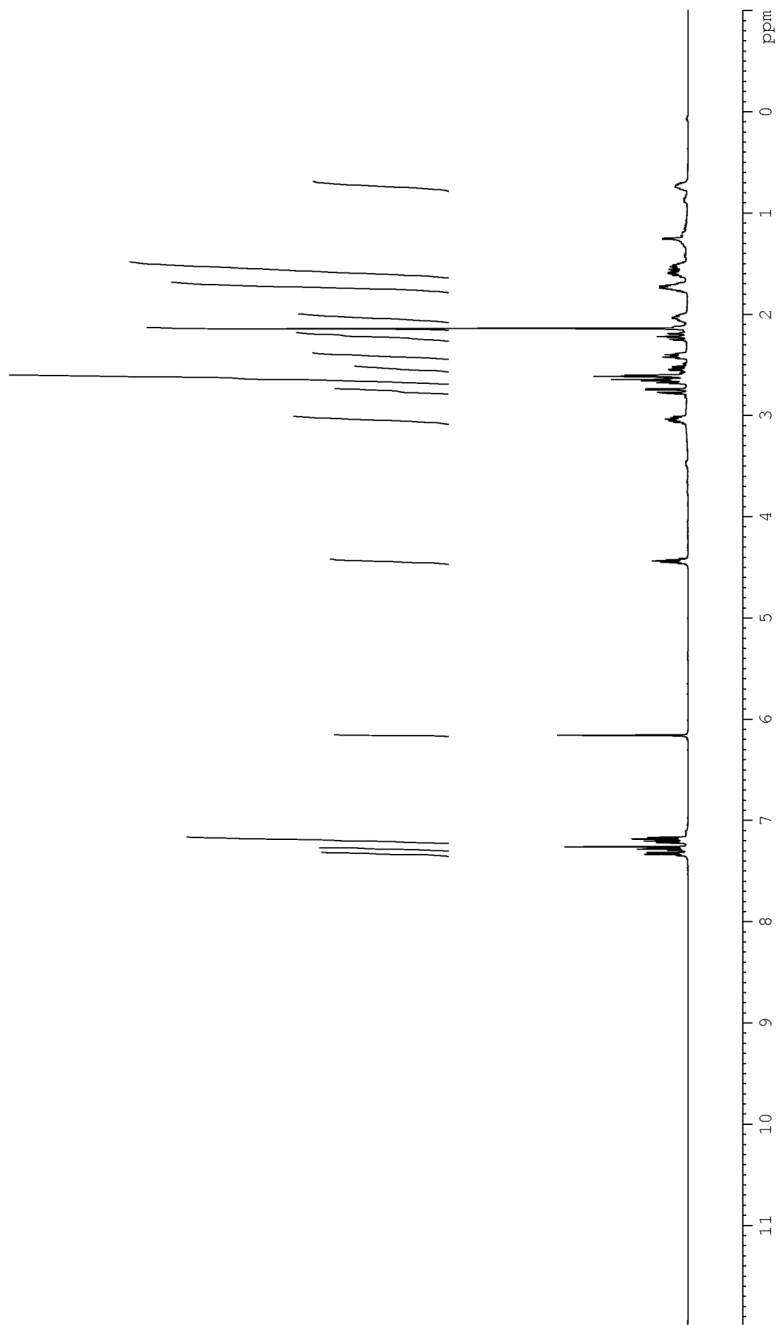

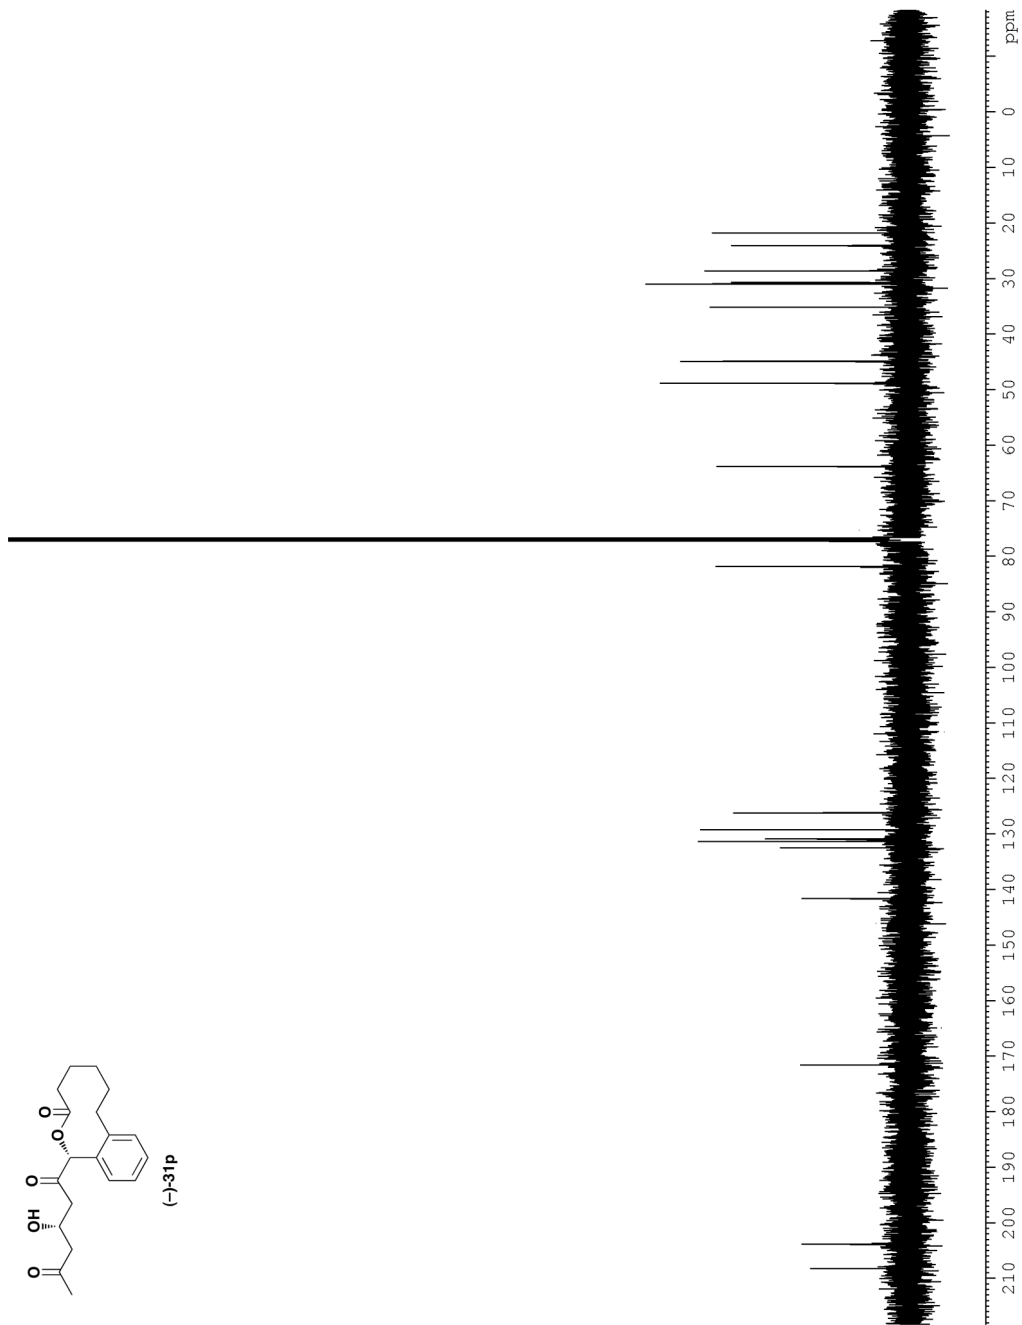

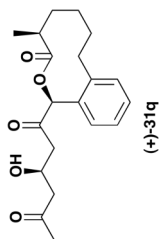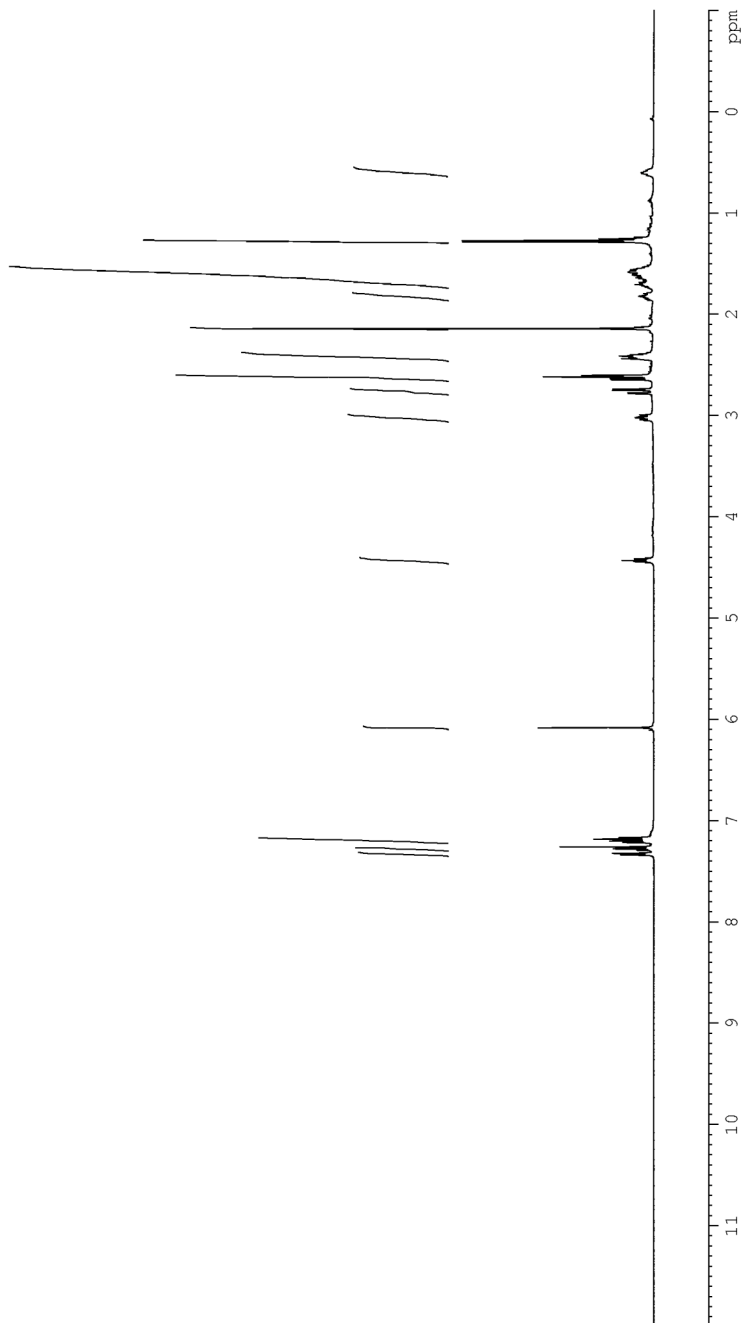

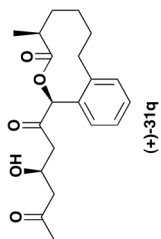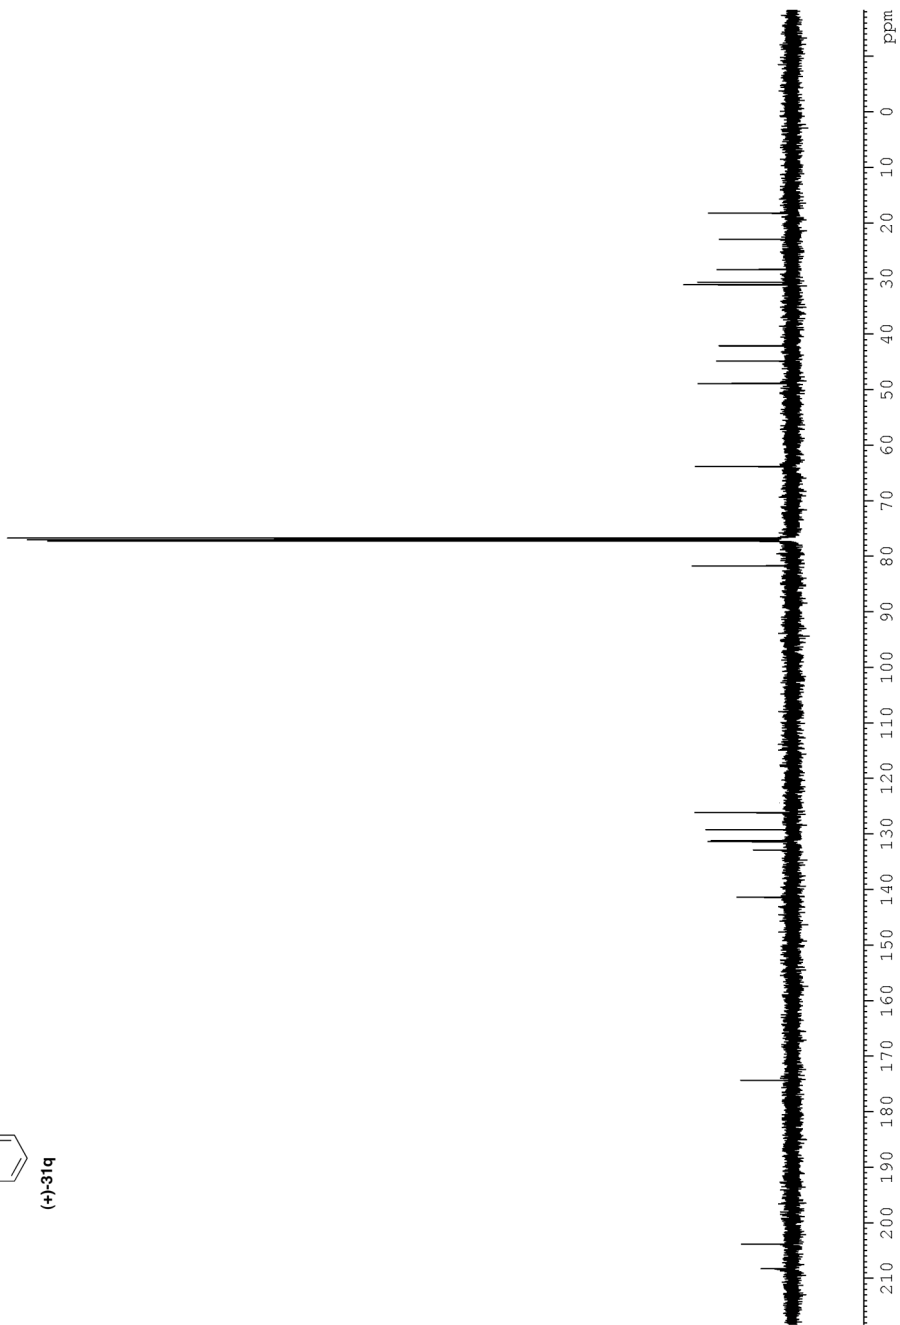

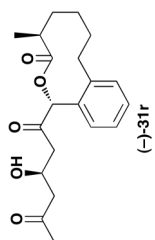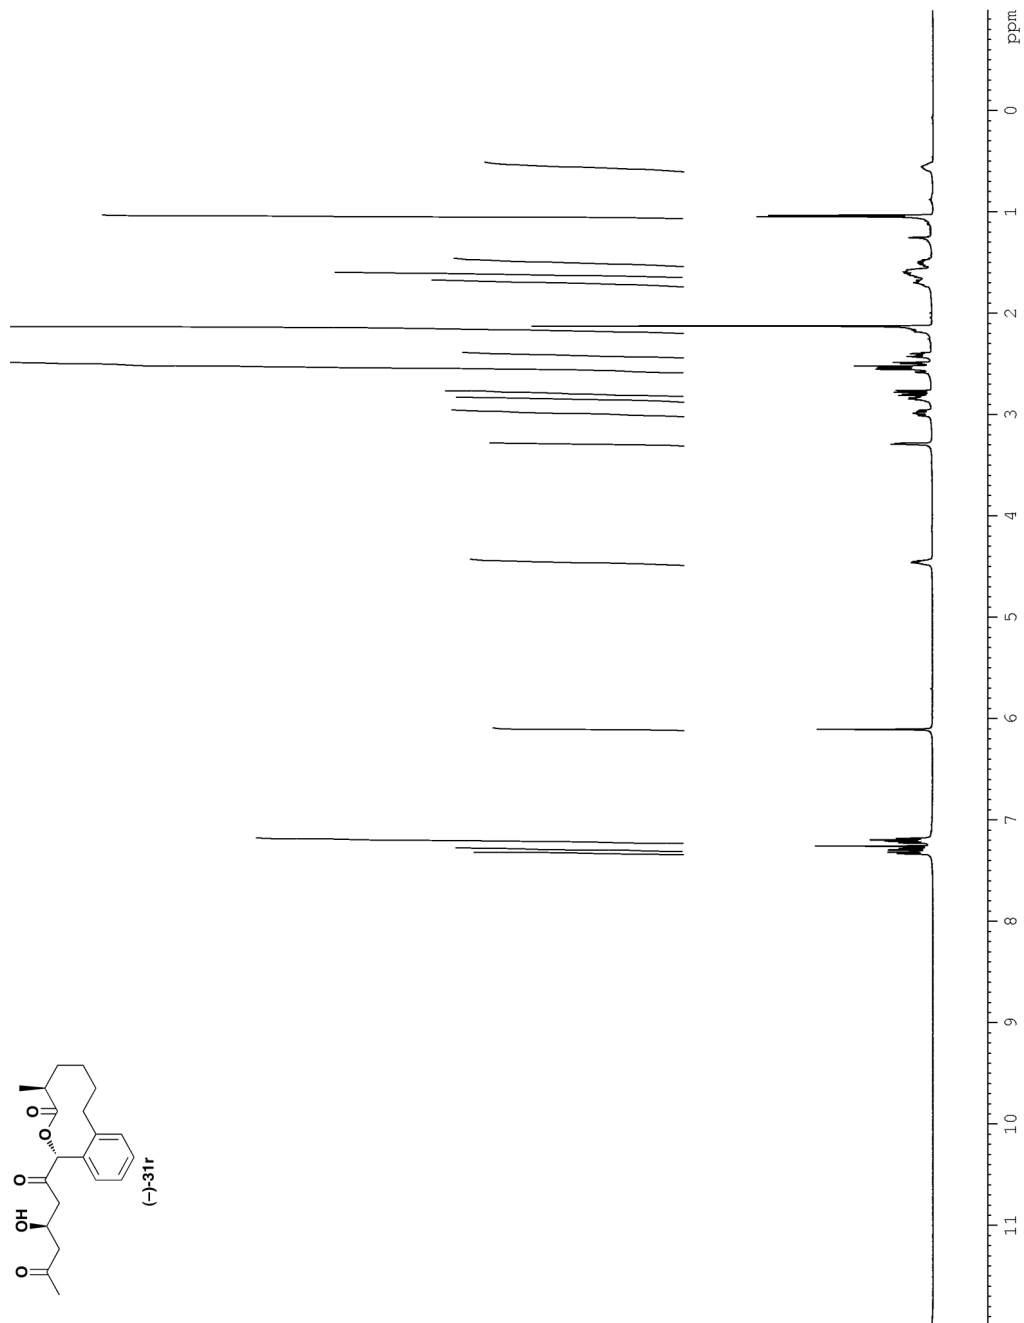

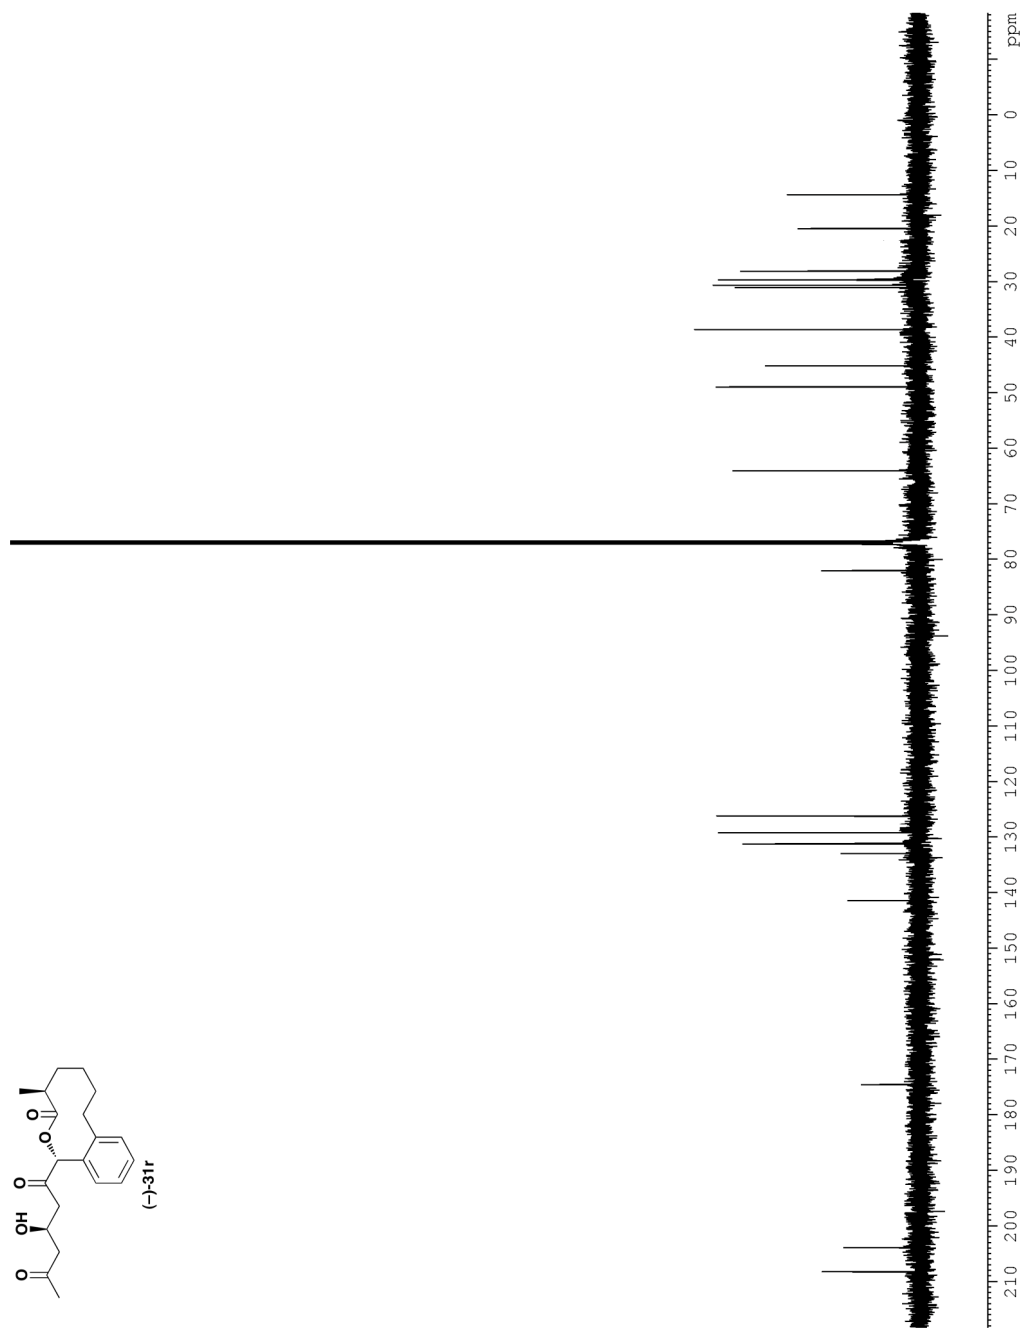



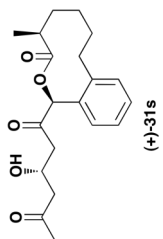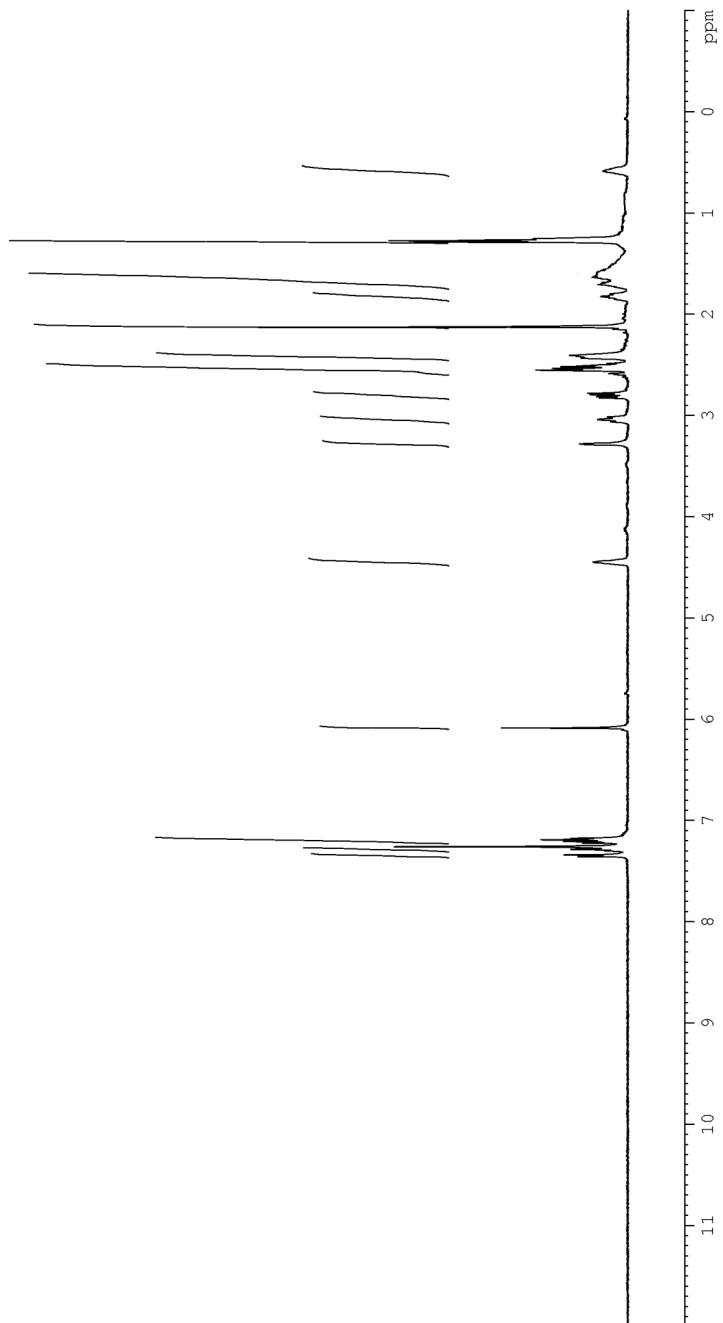

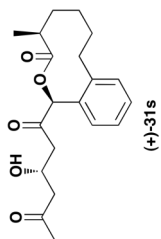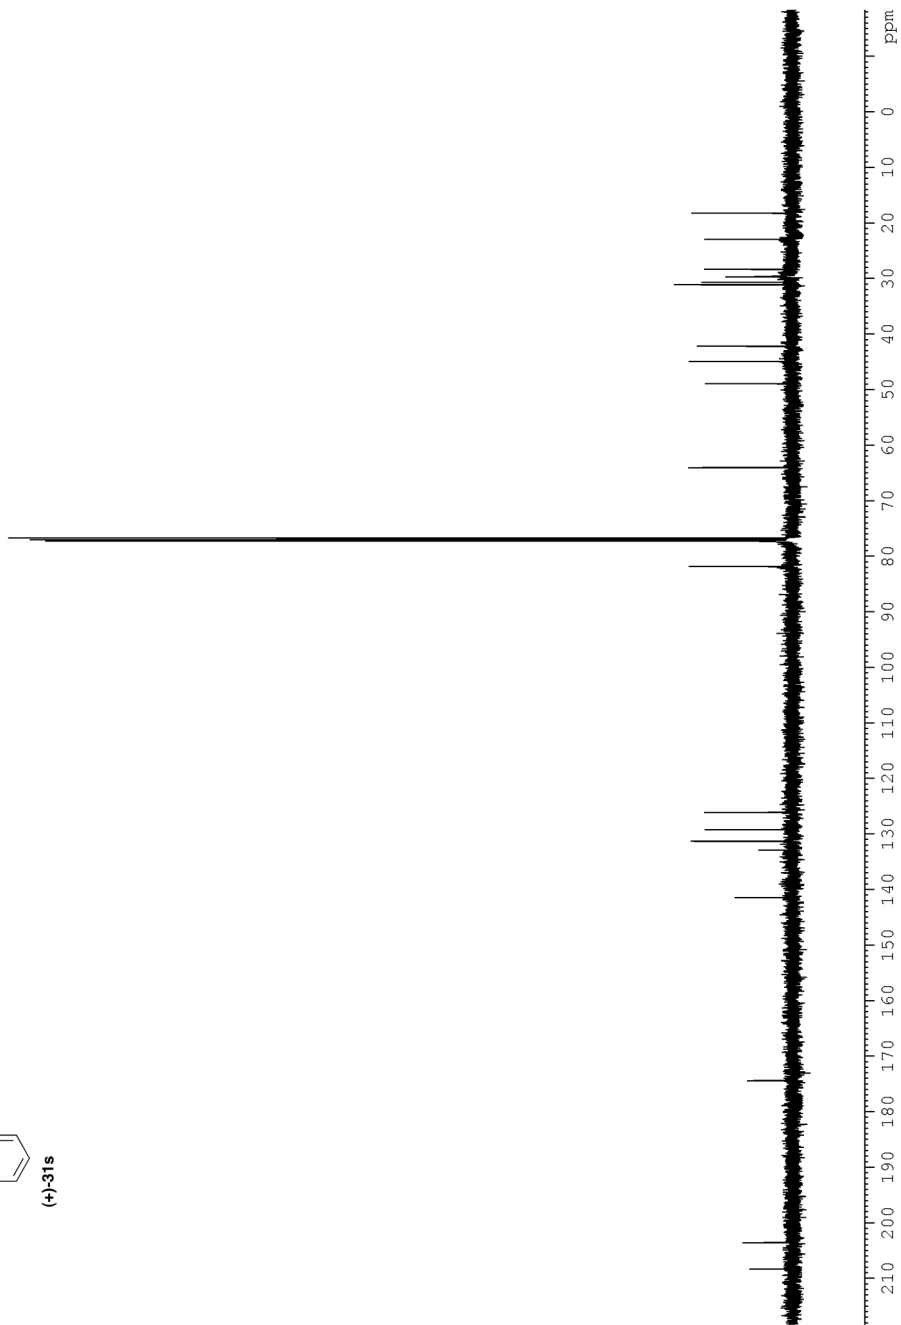

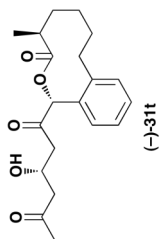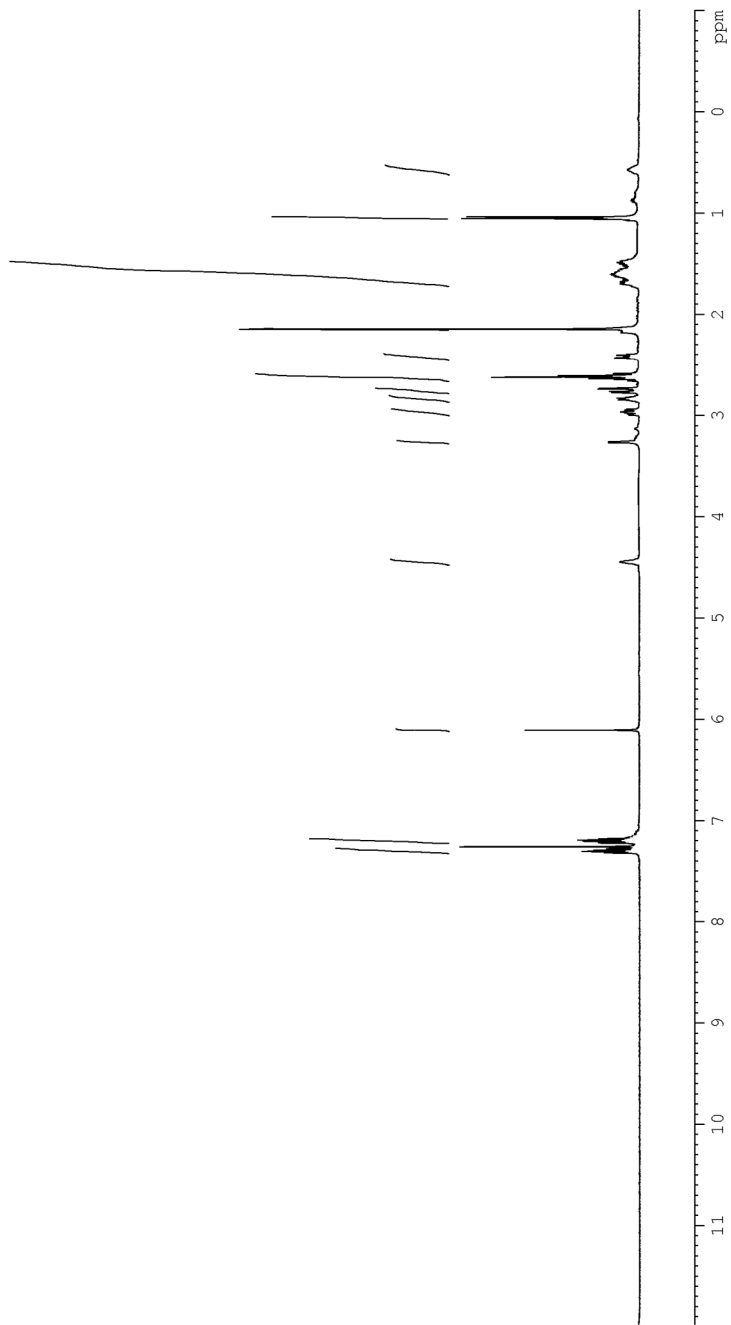

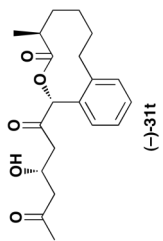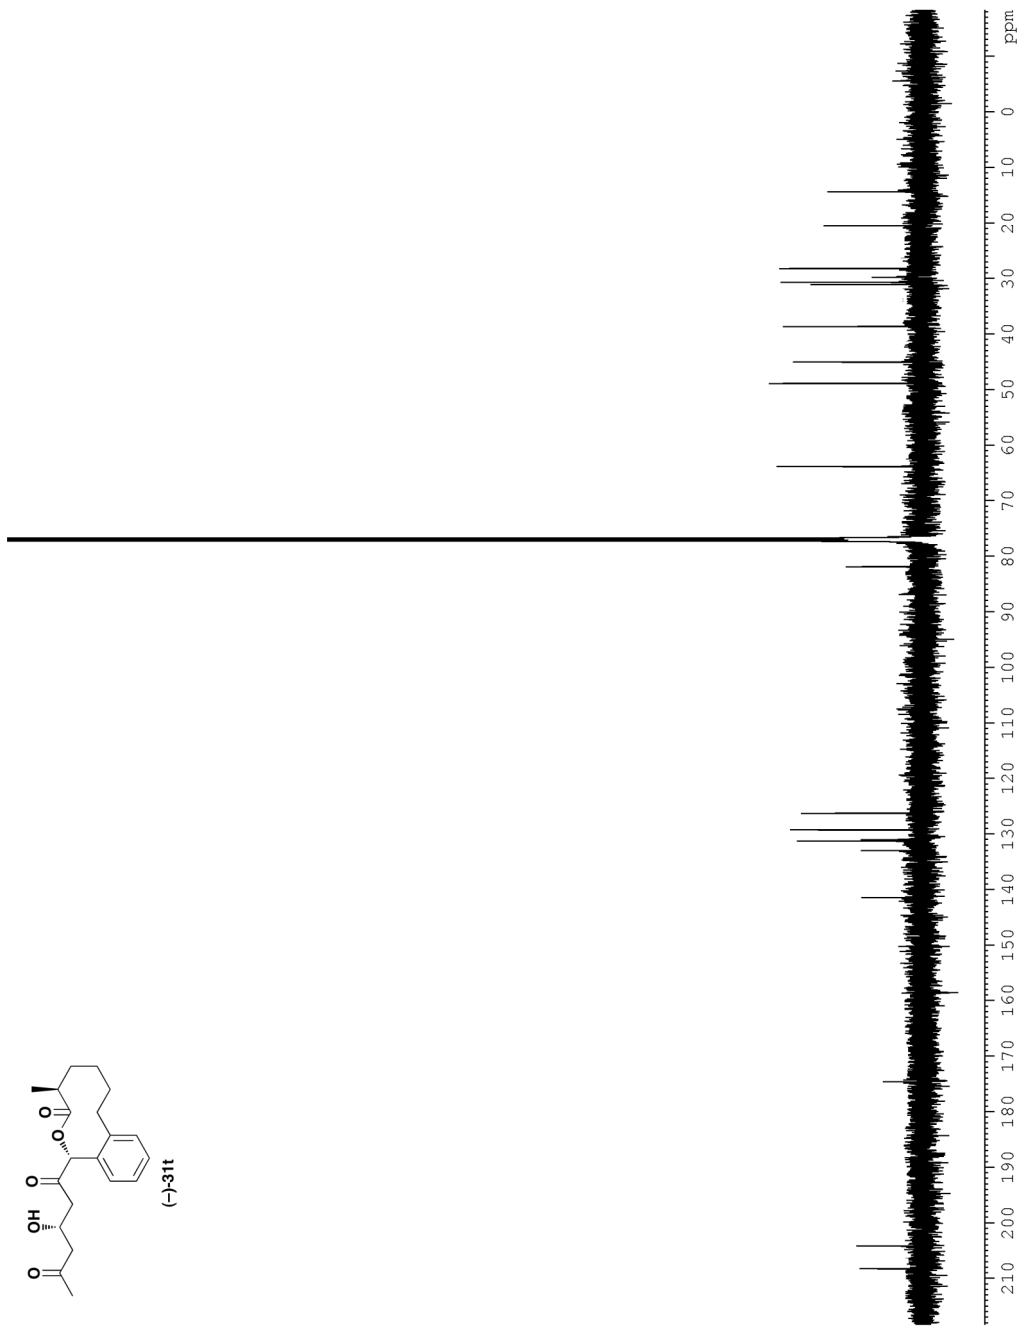

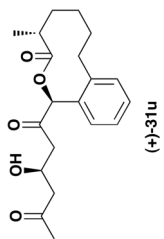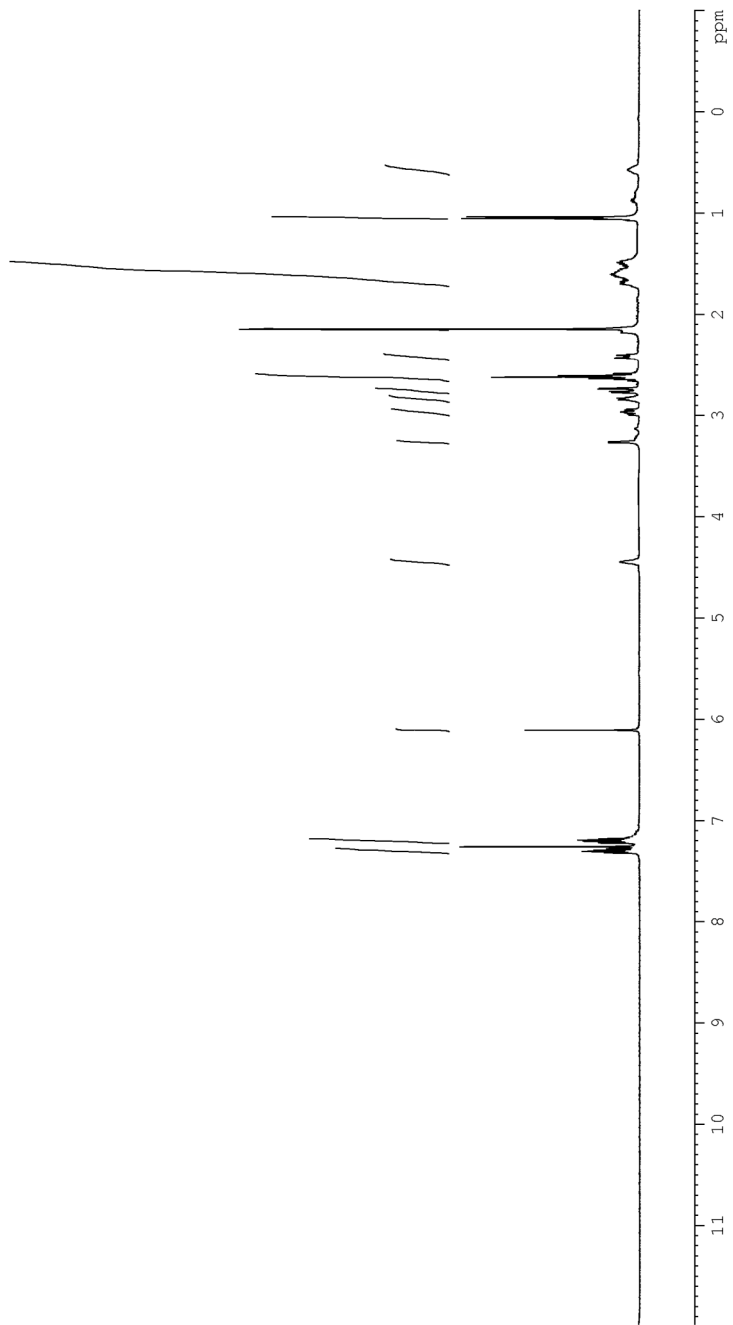

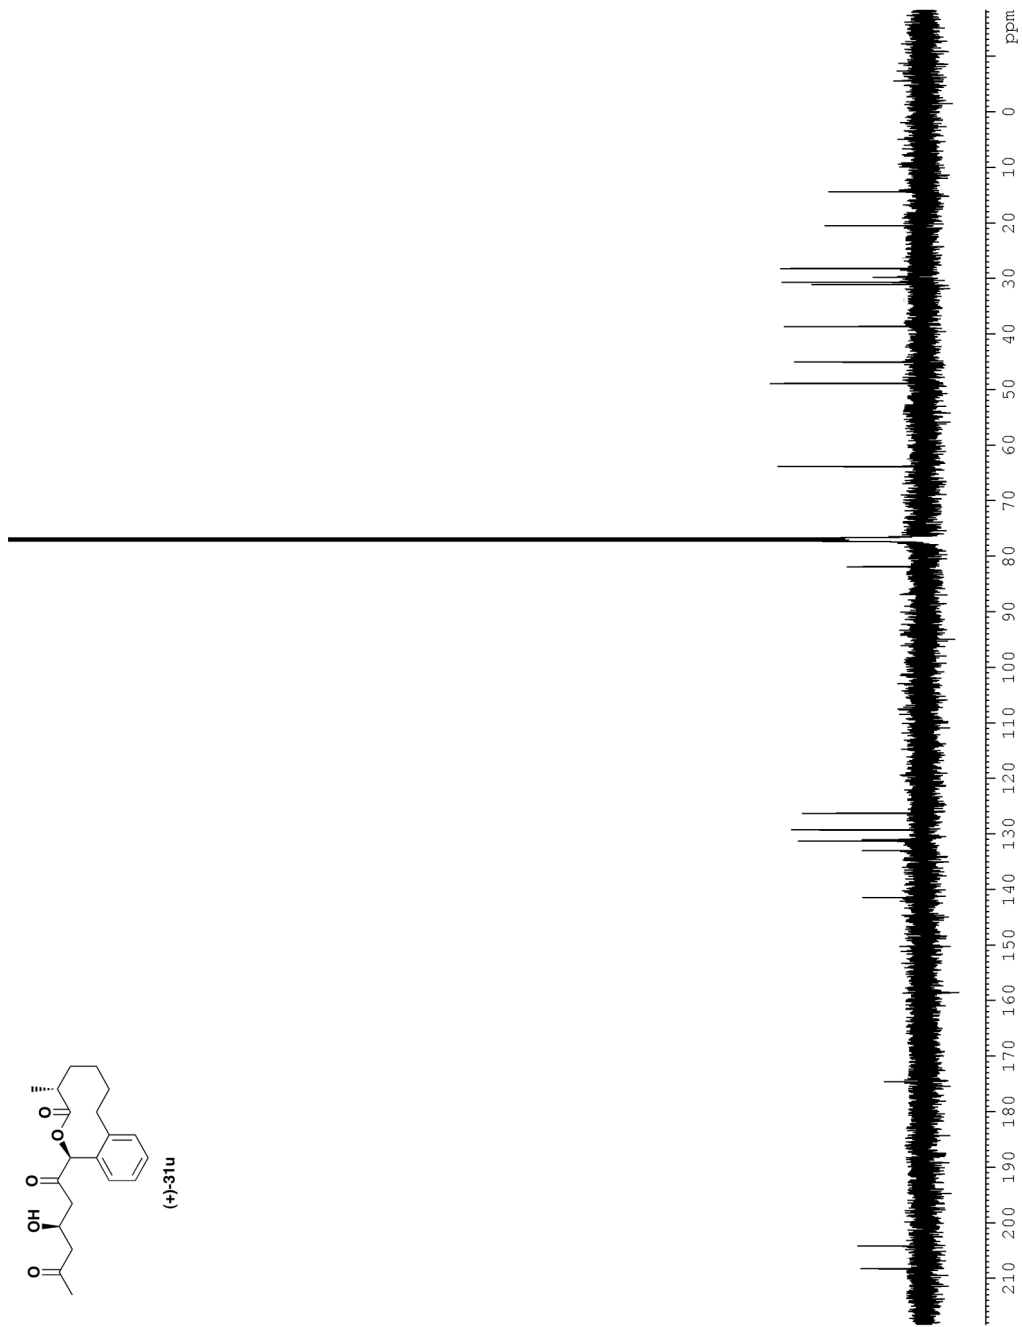

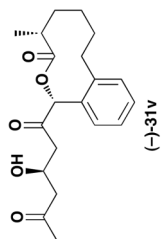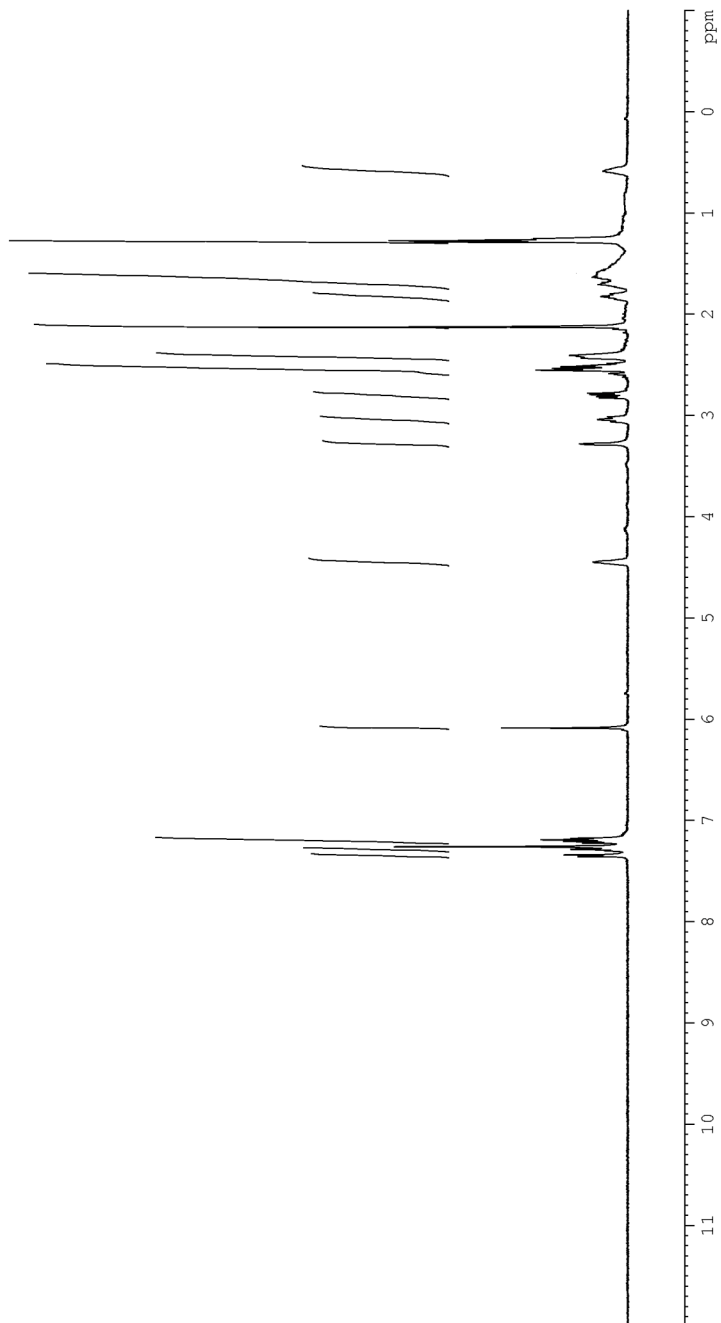

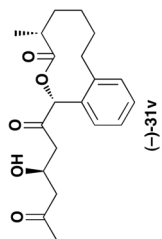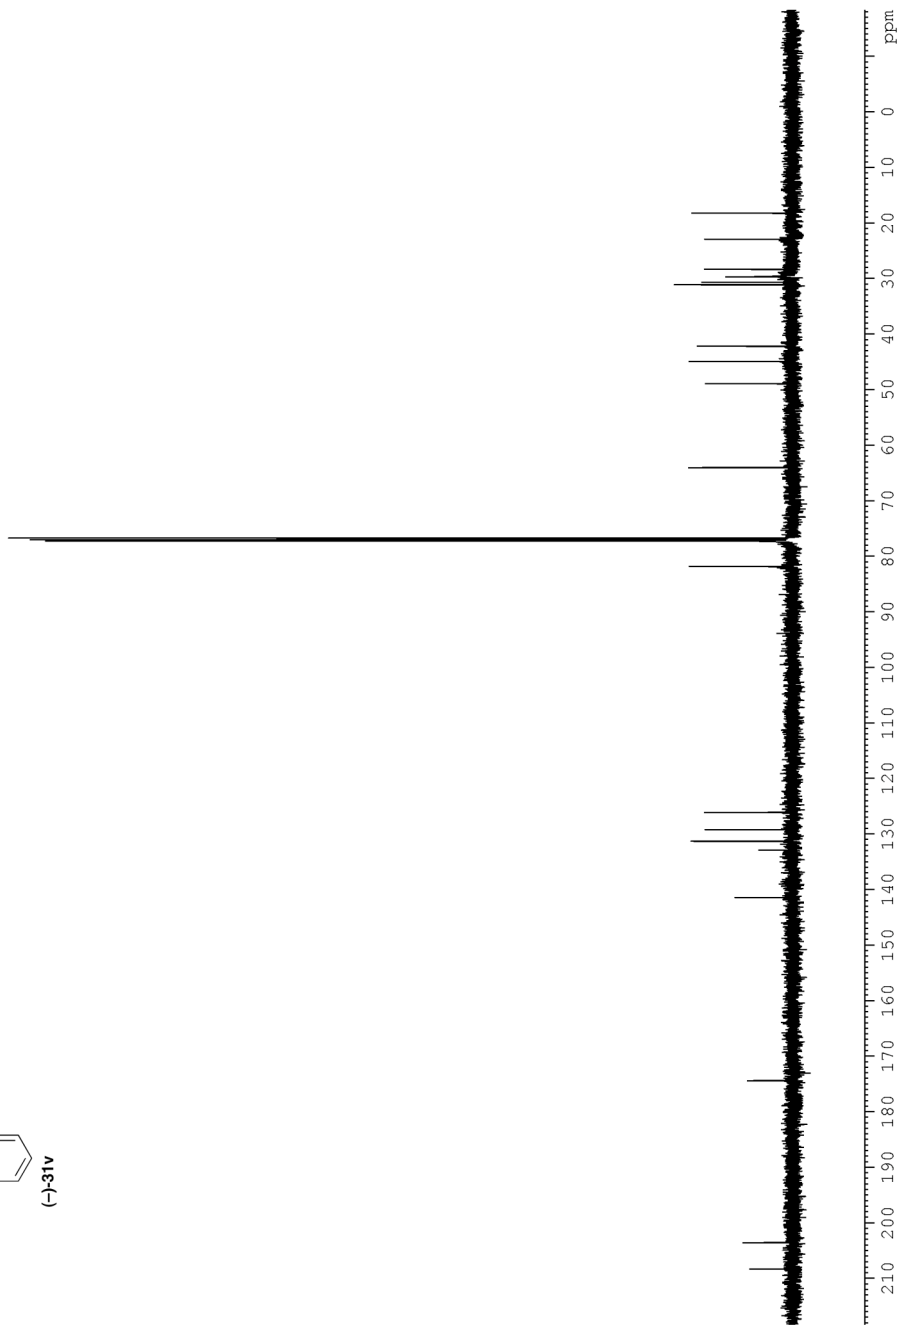



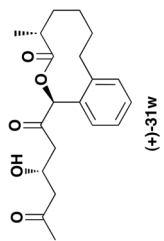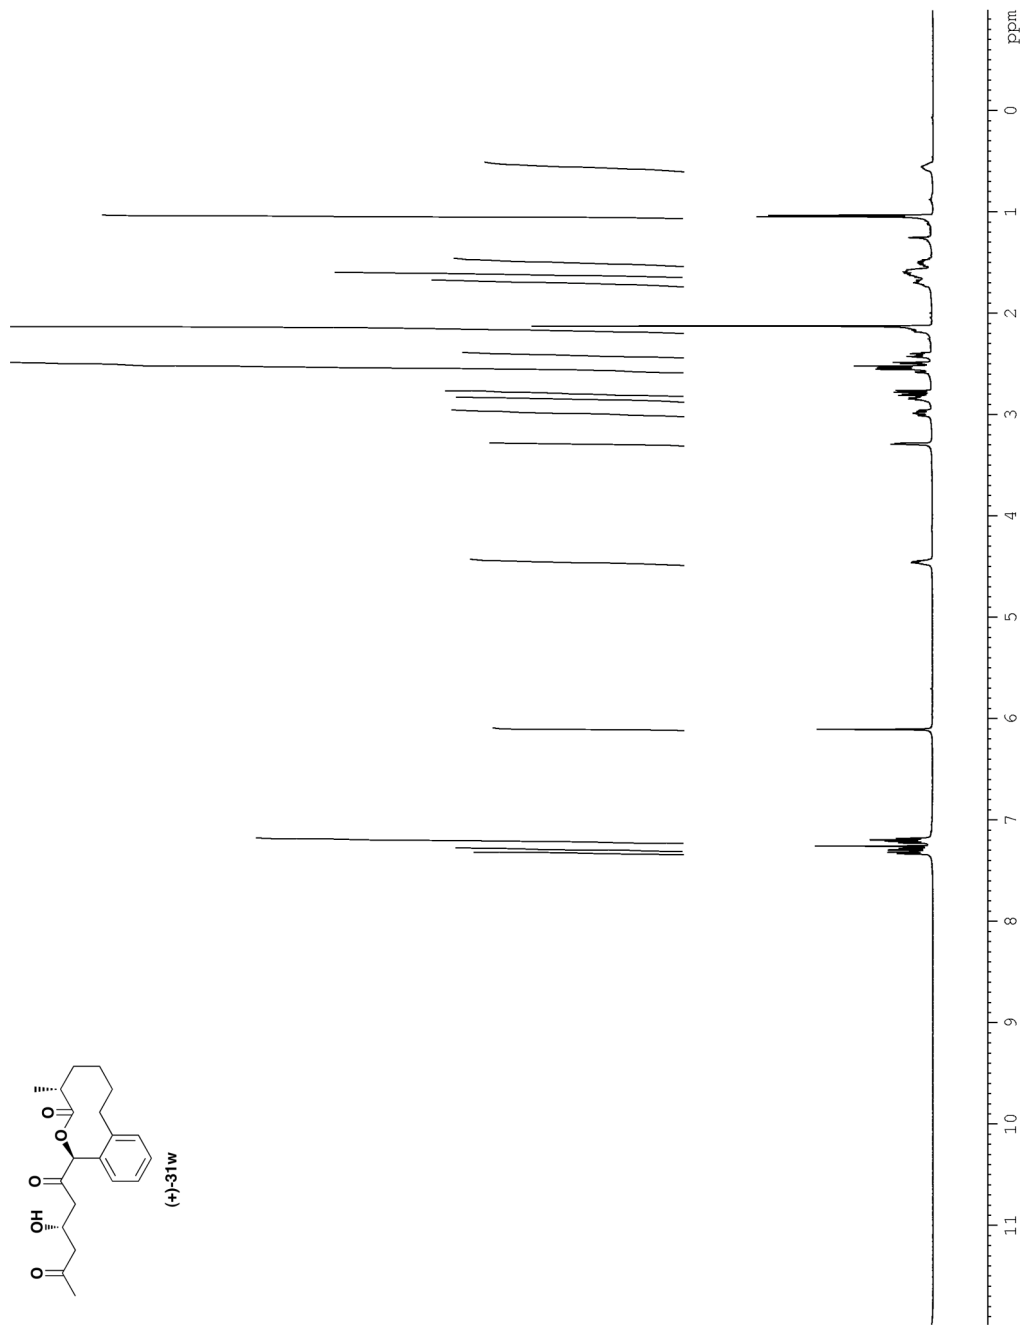

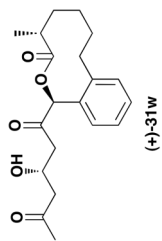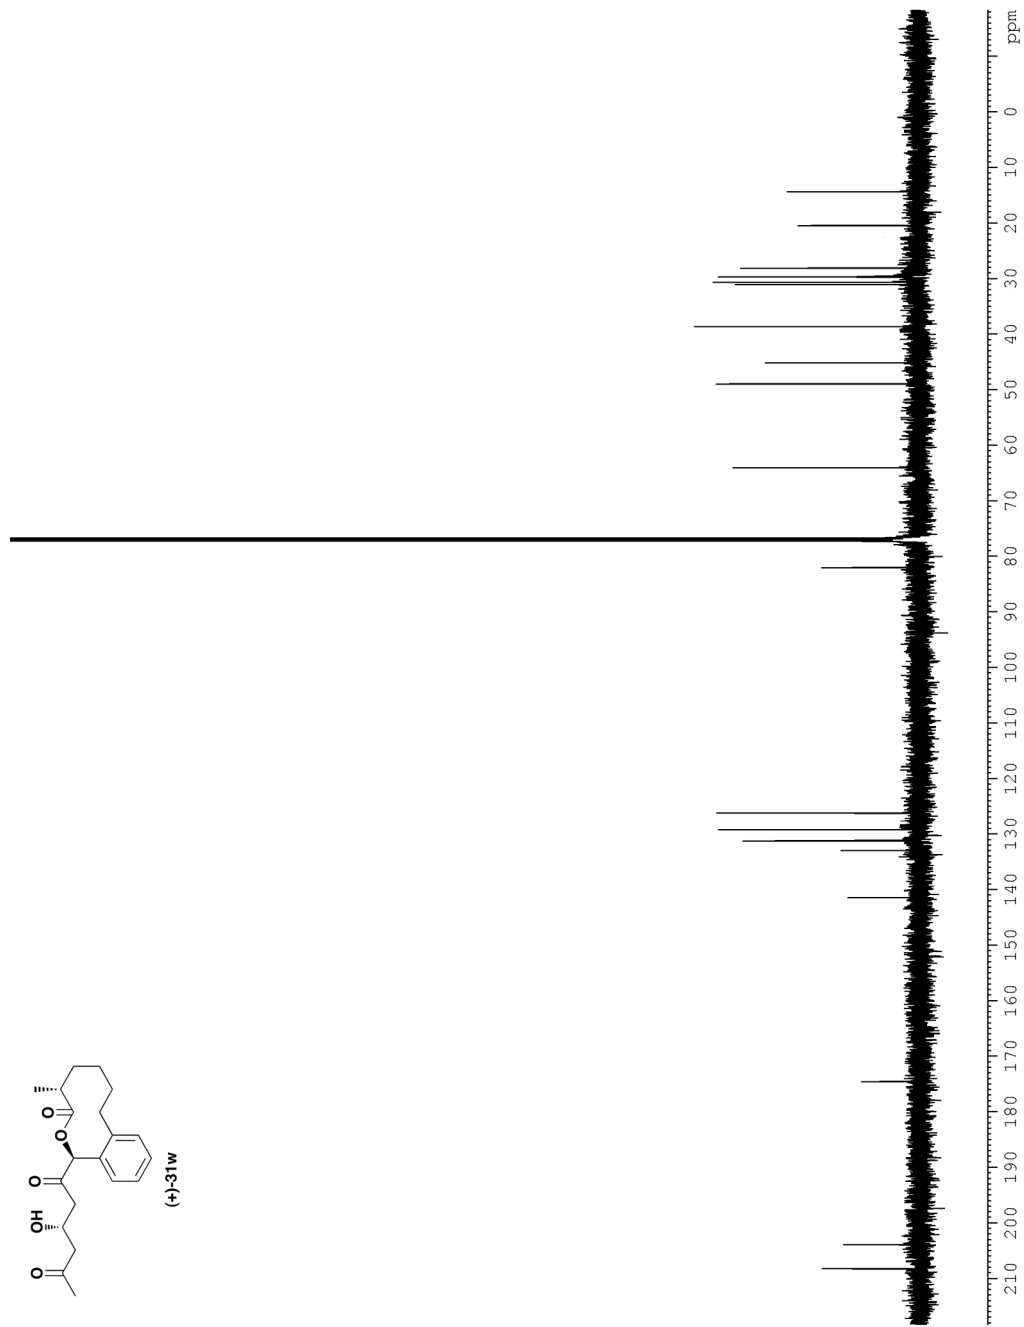

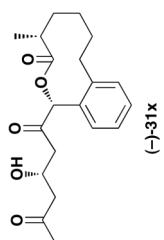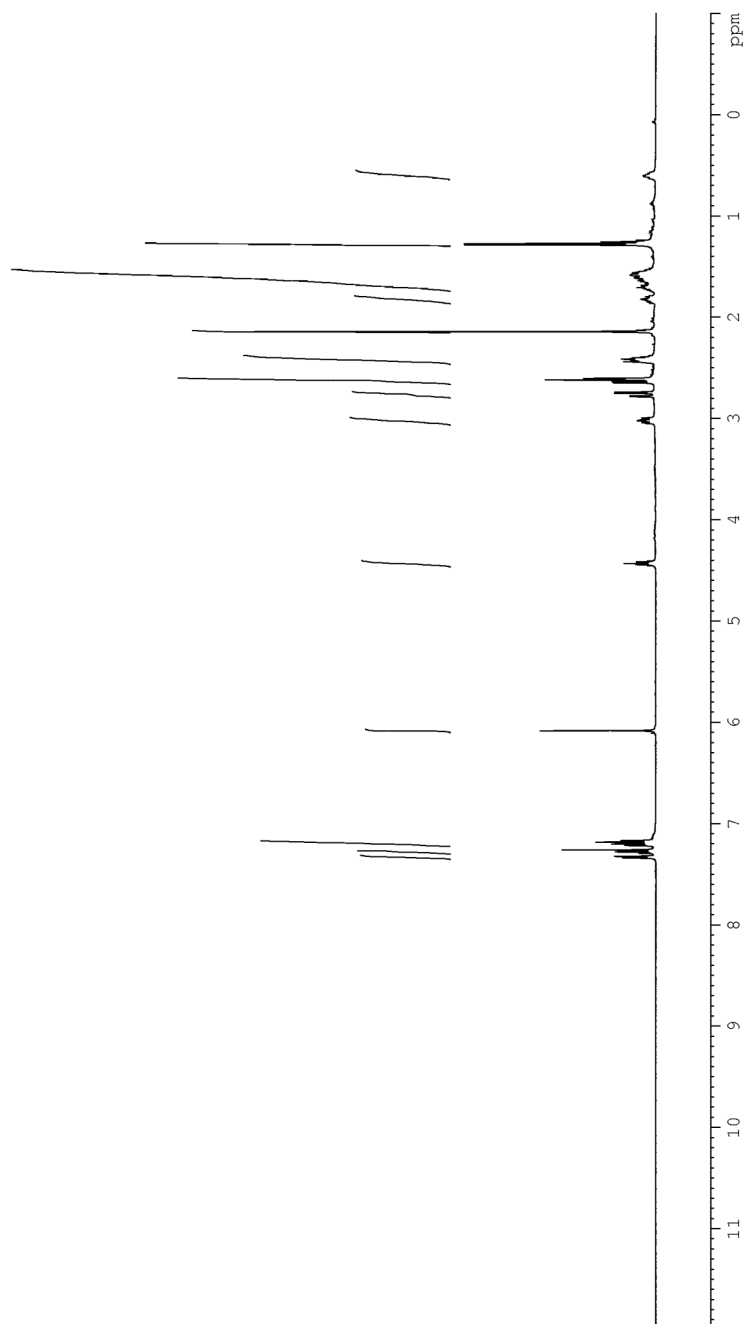

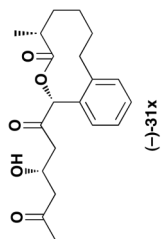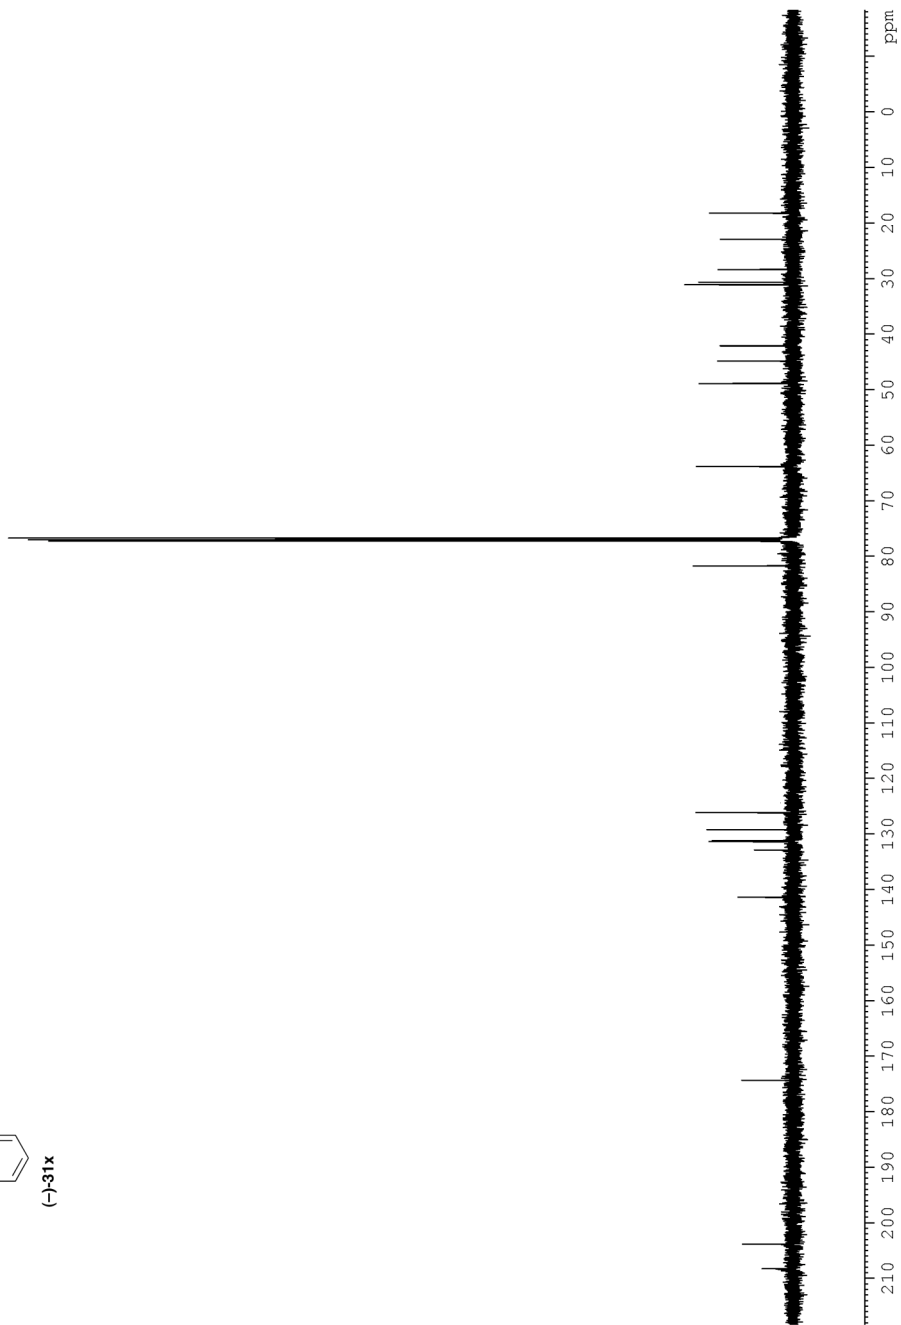

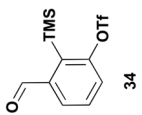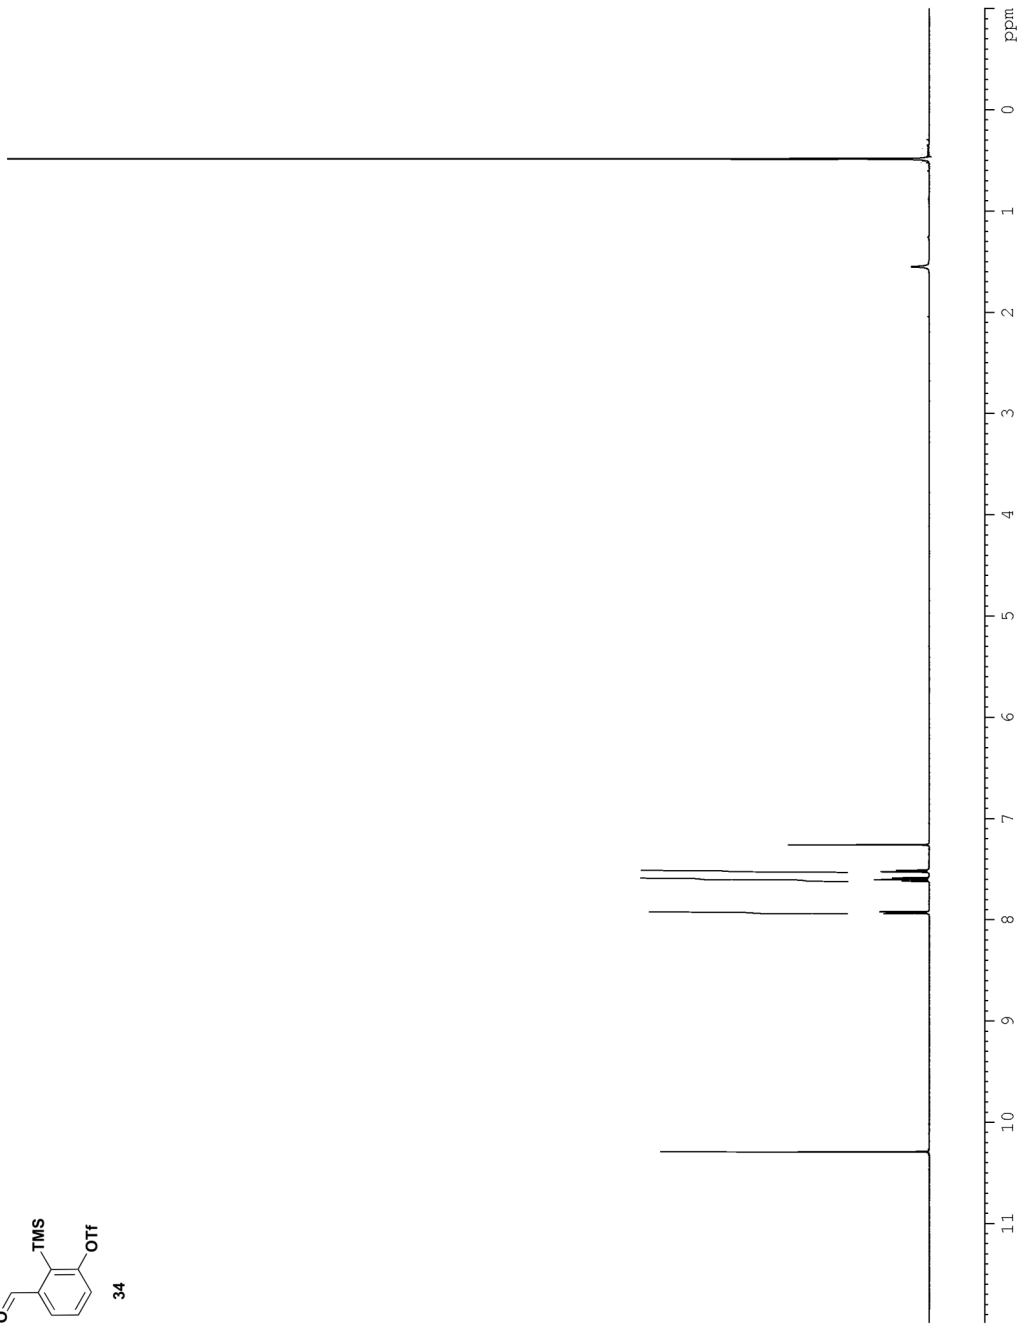

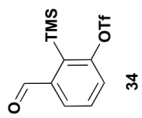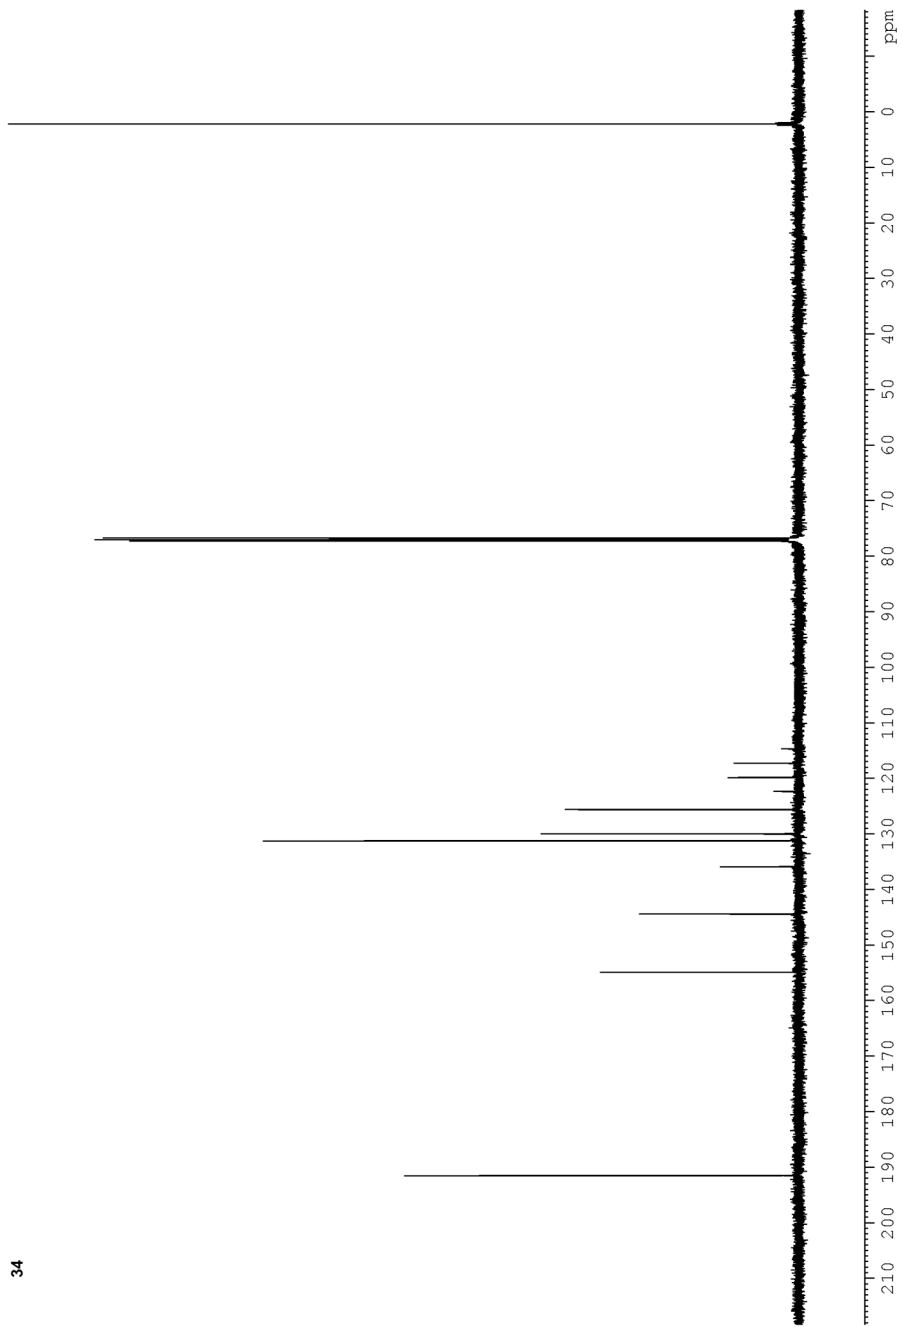

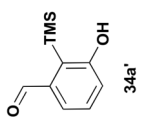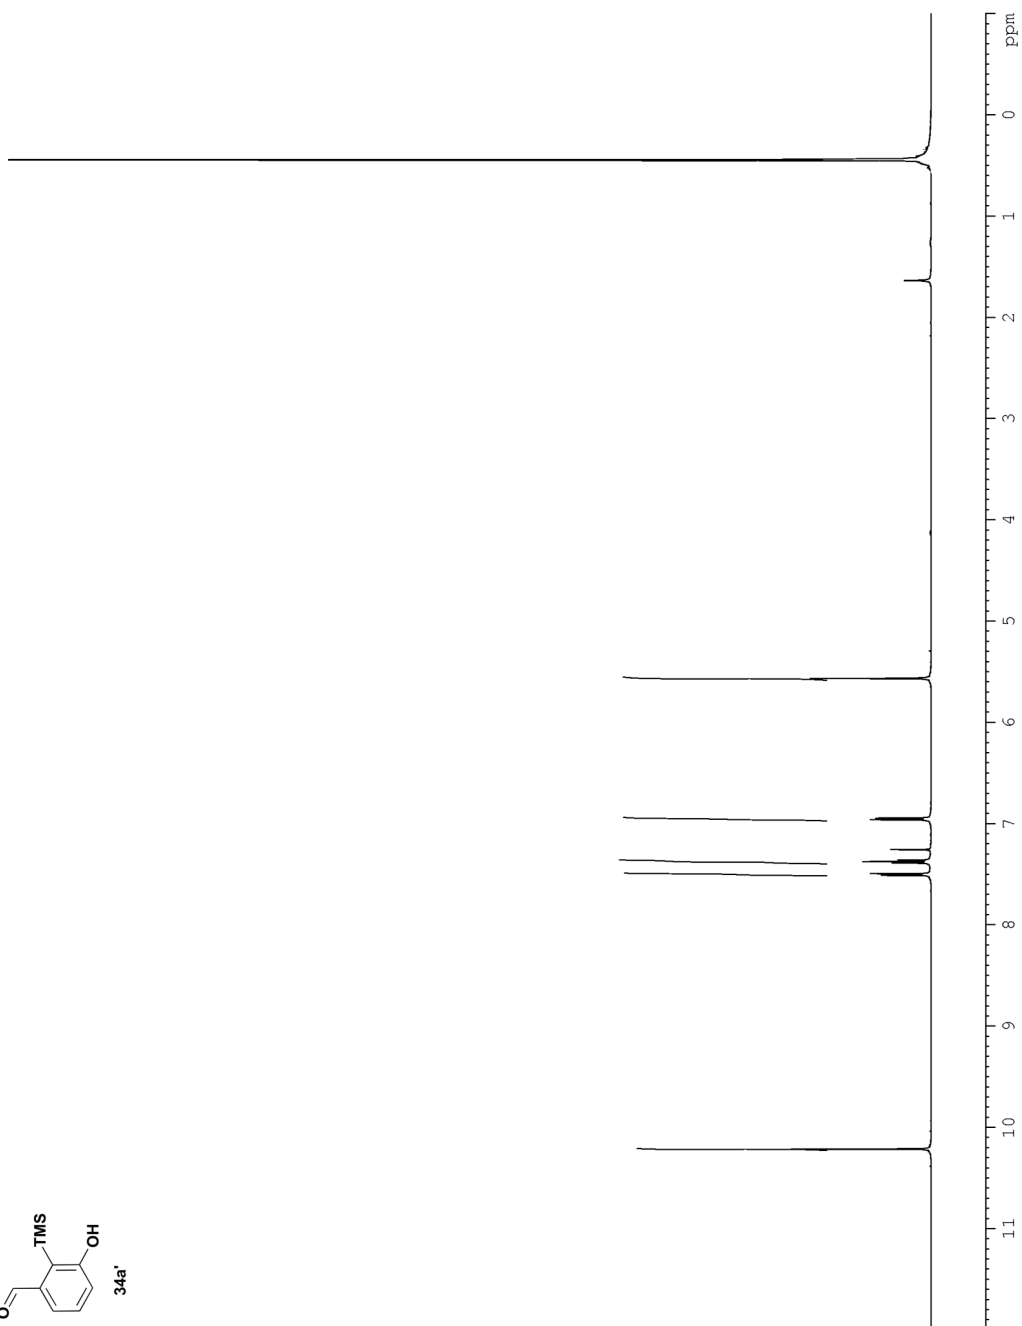

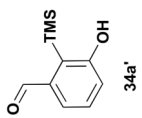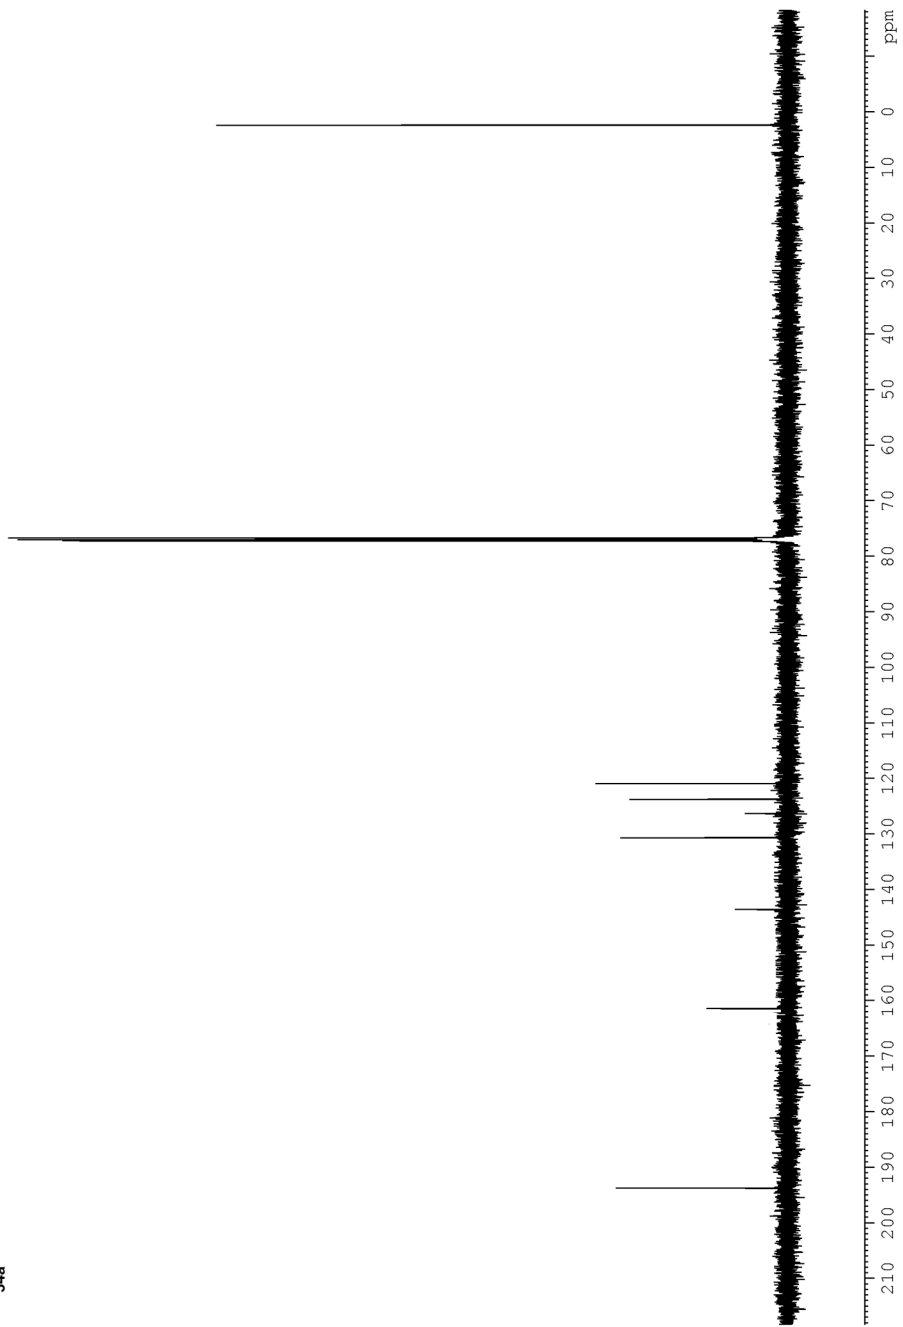



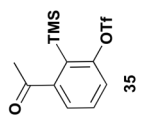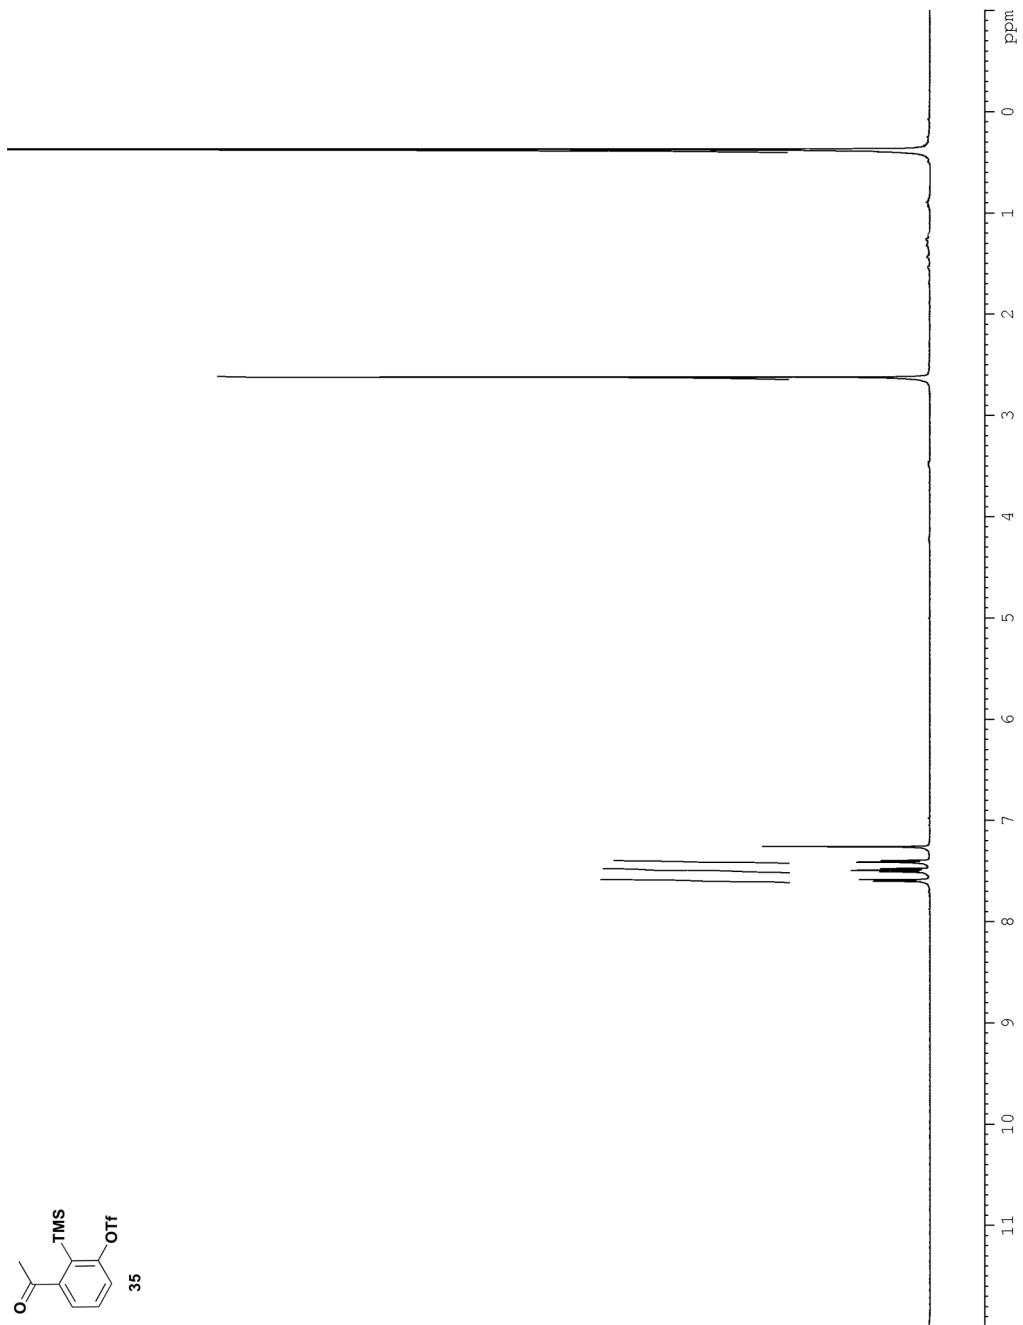

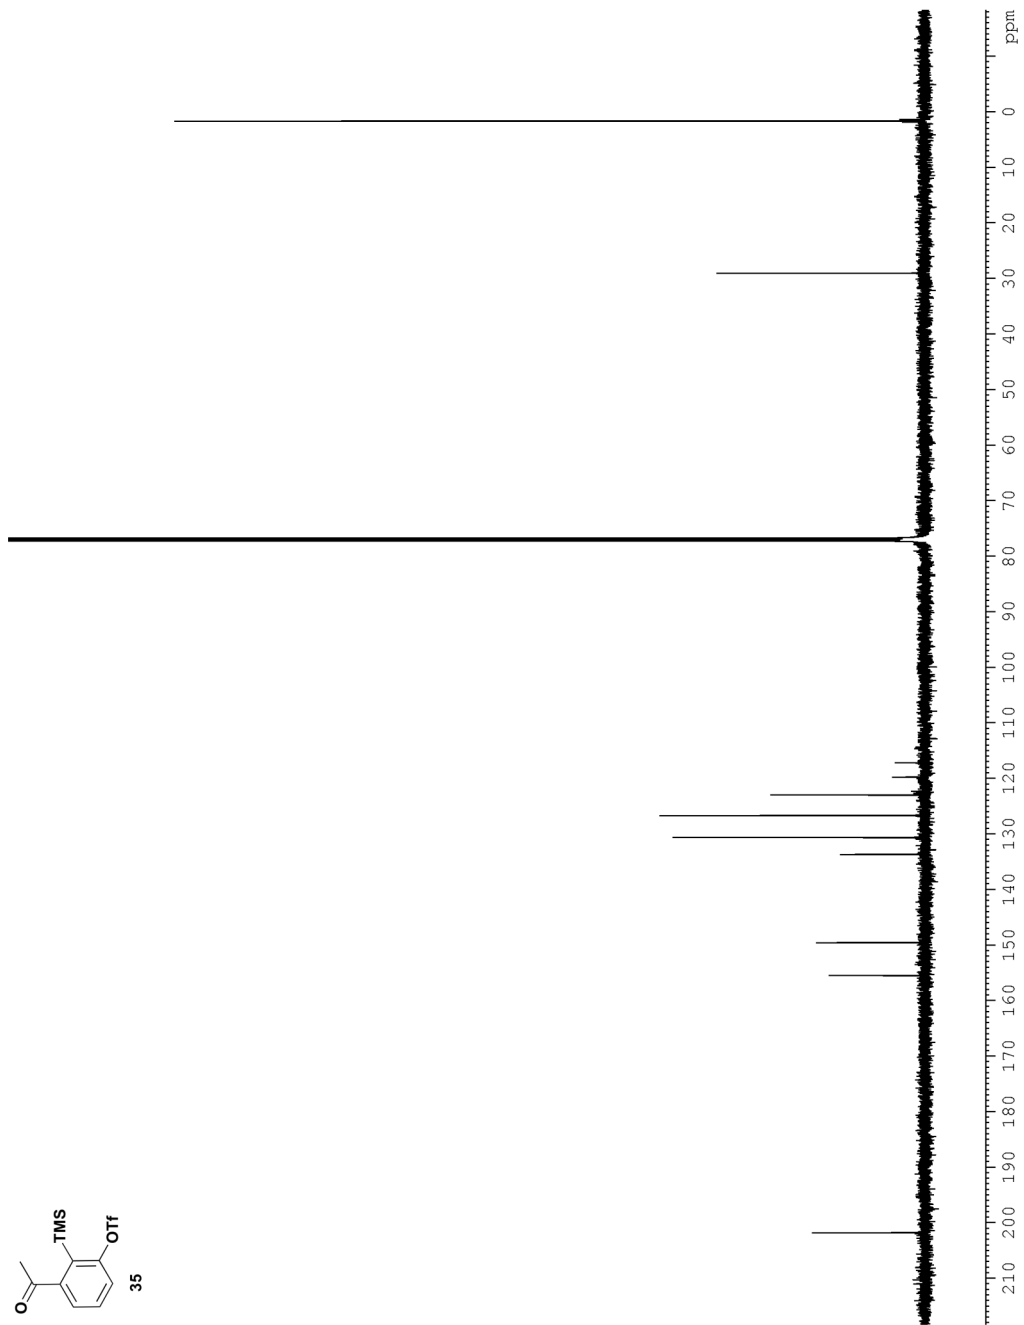

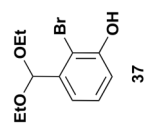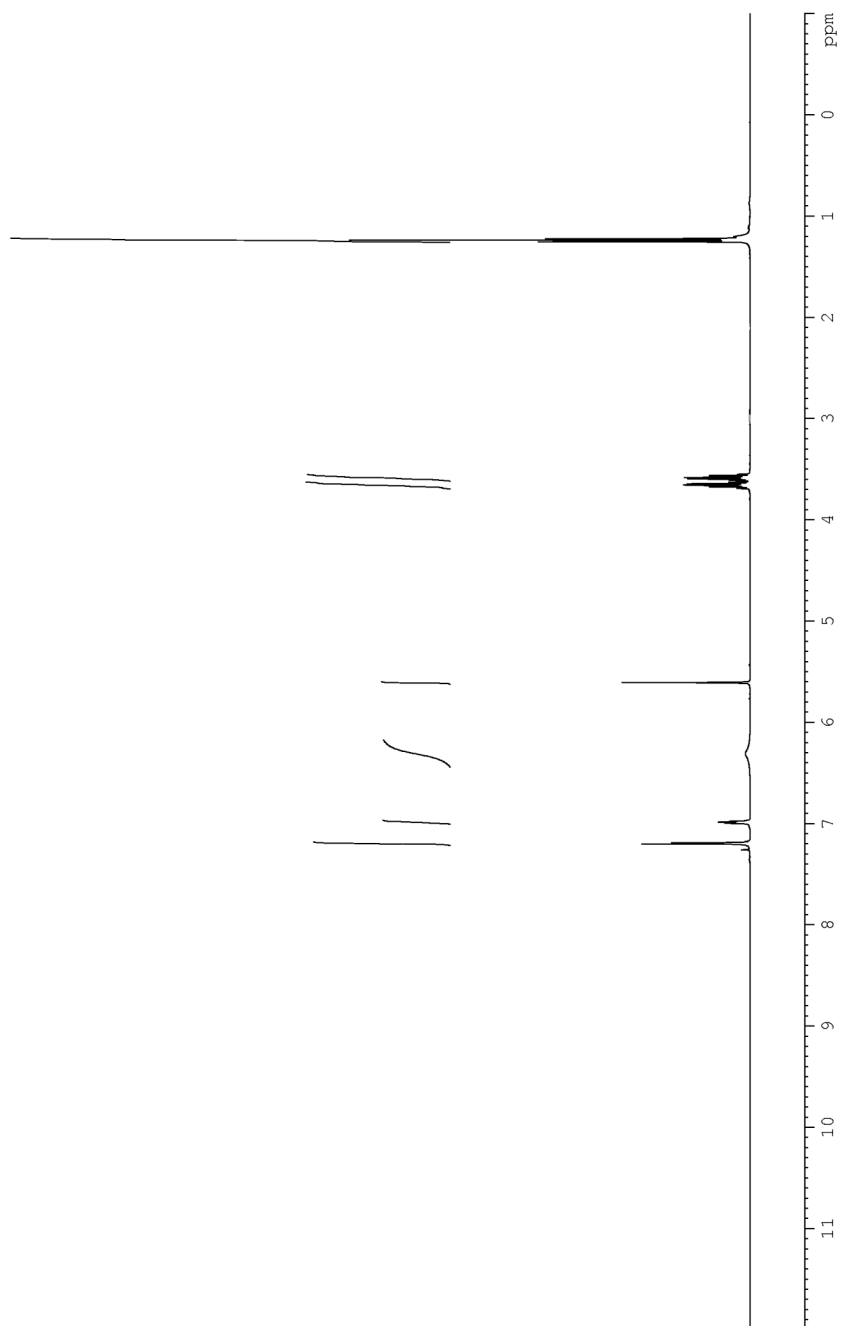

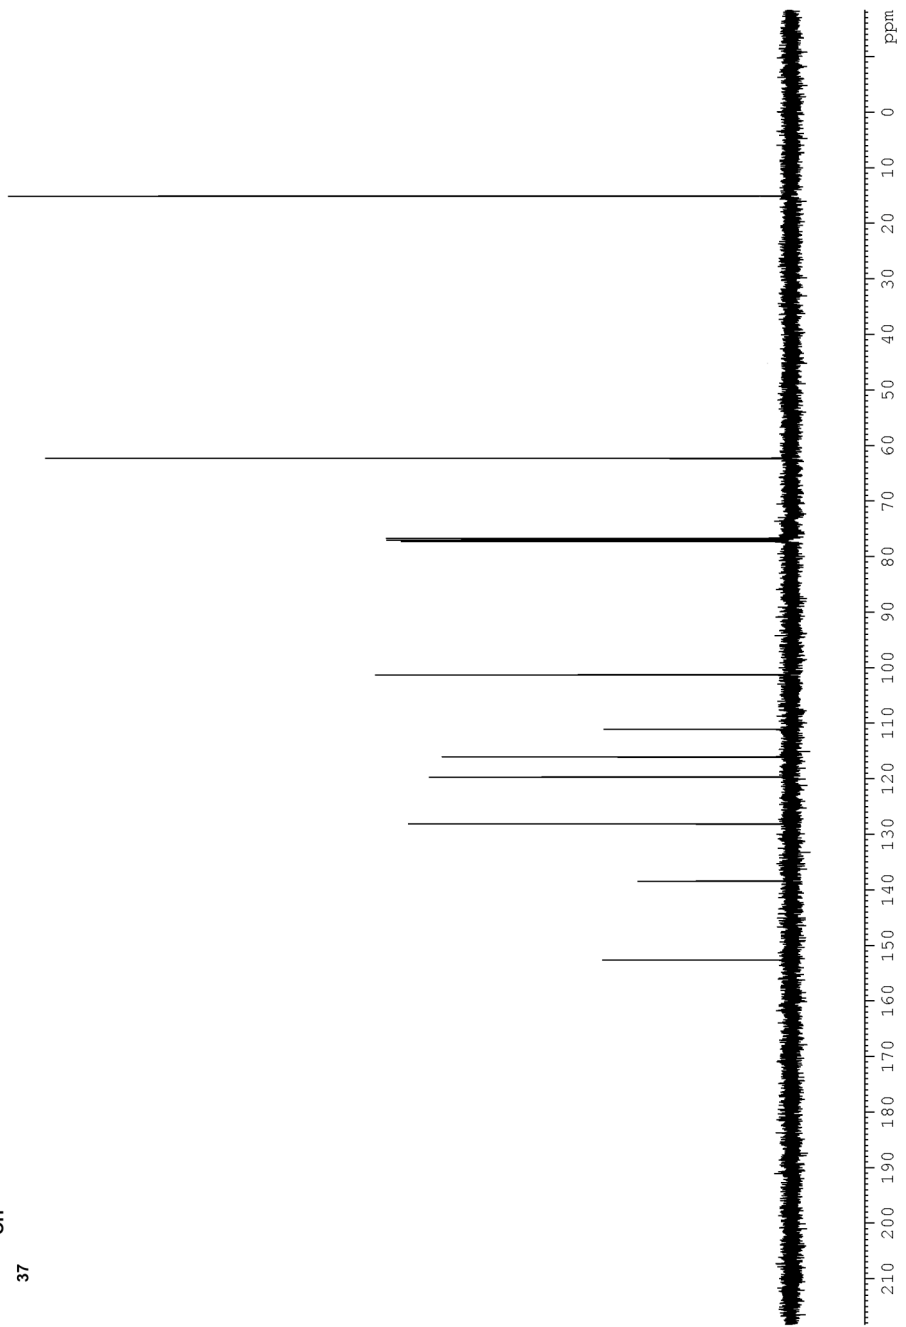

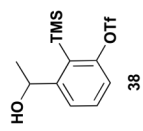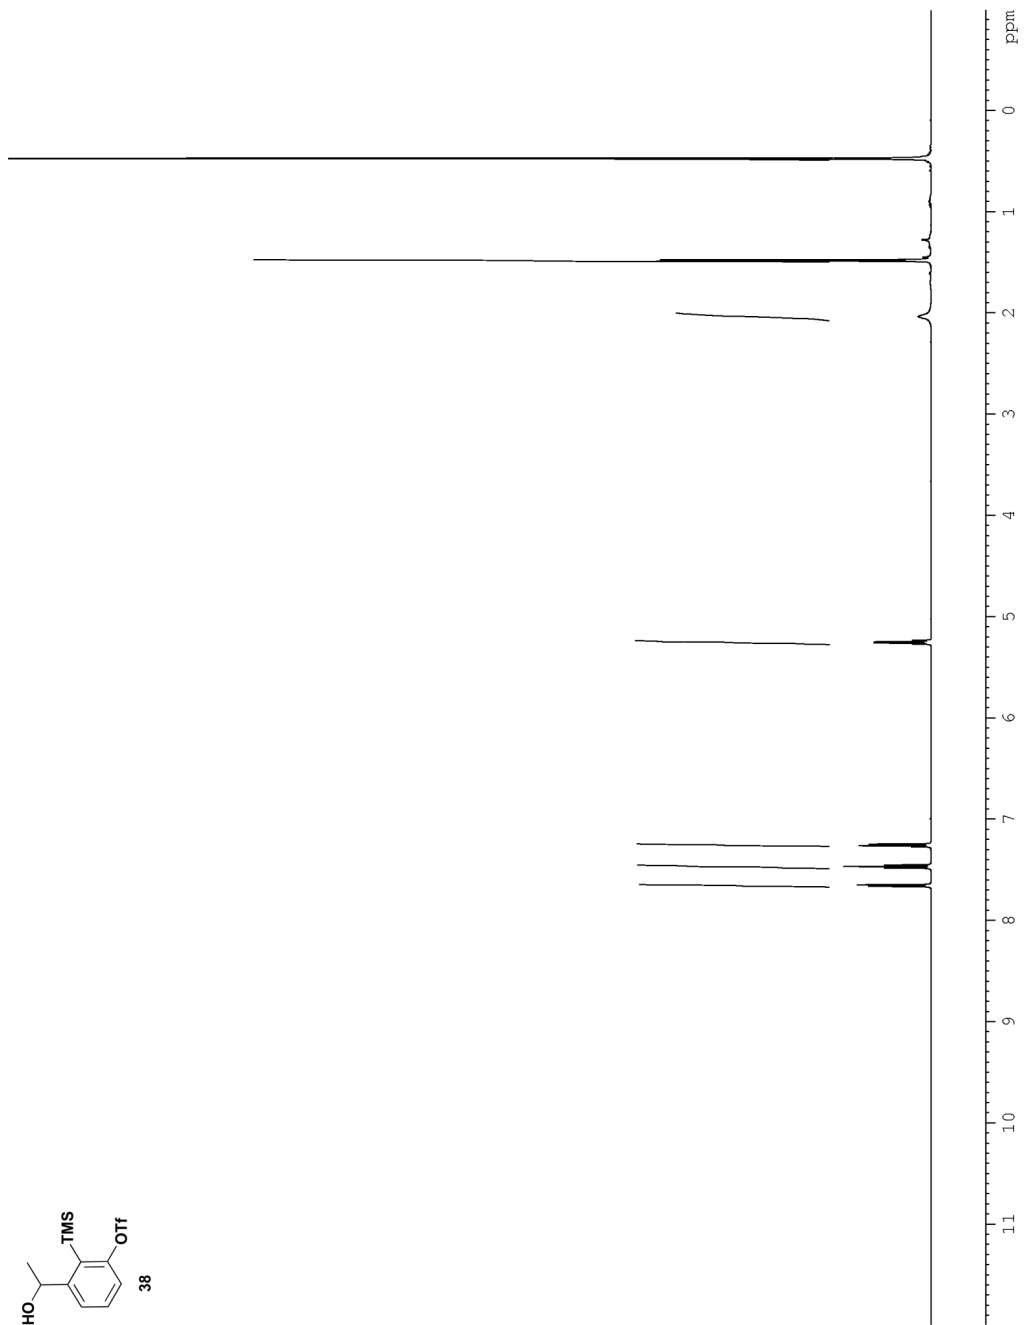

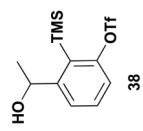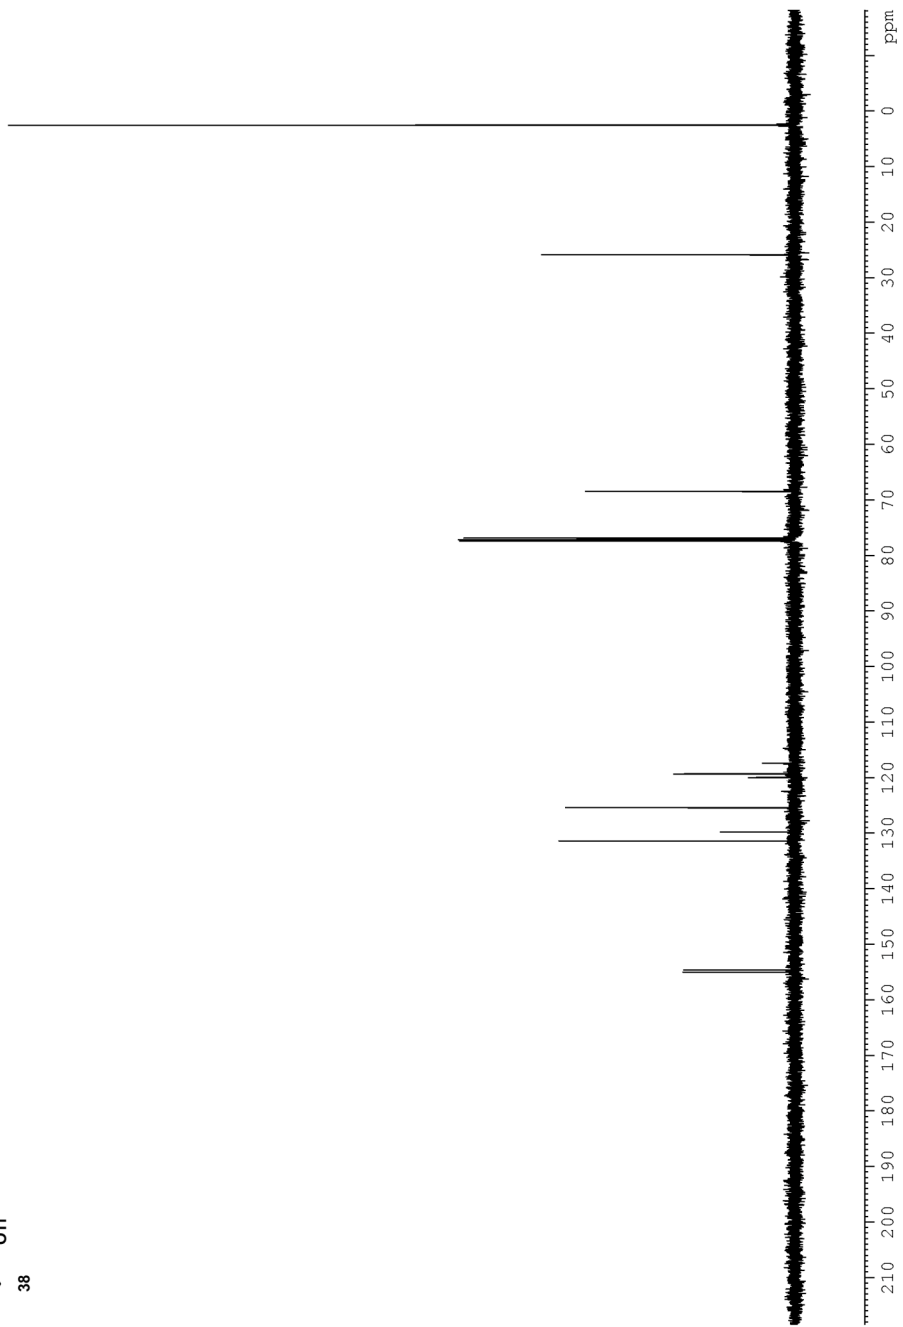

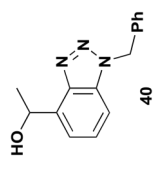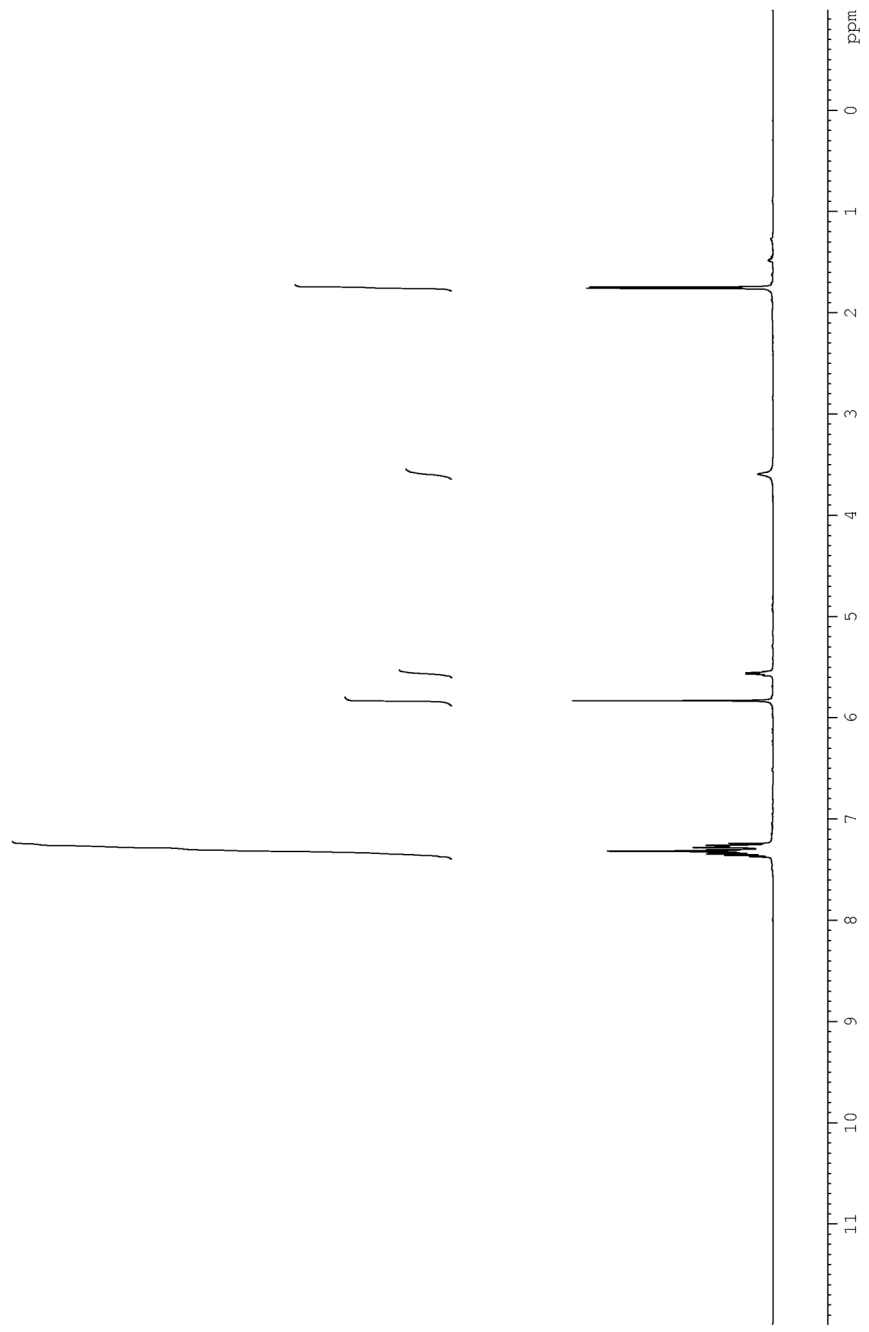

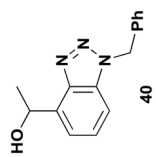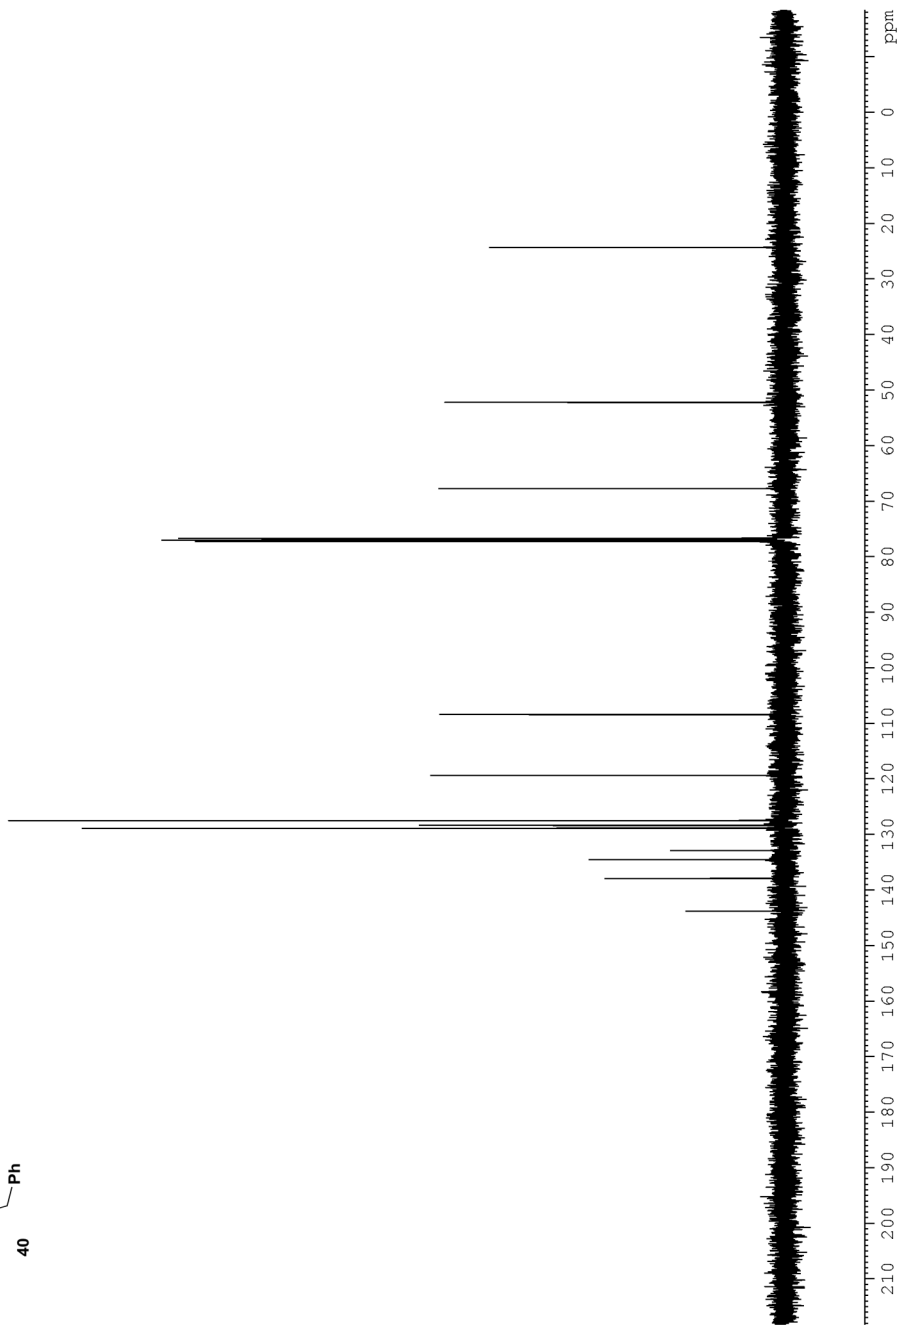



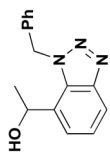

41

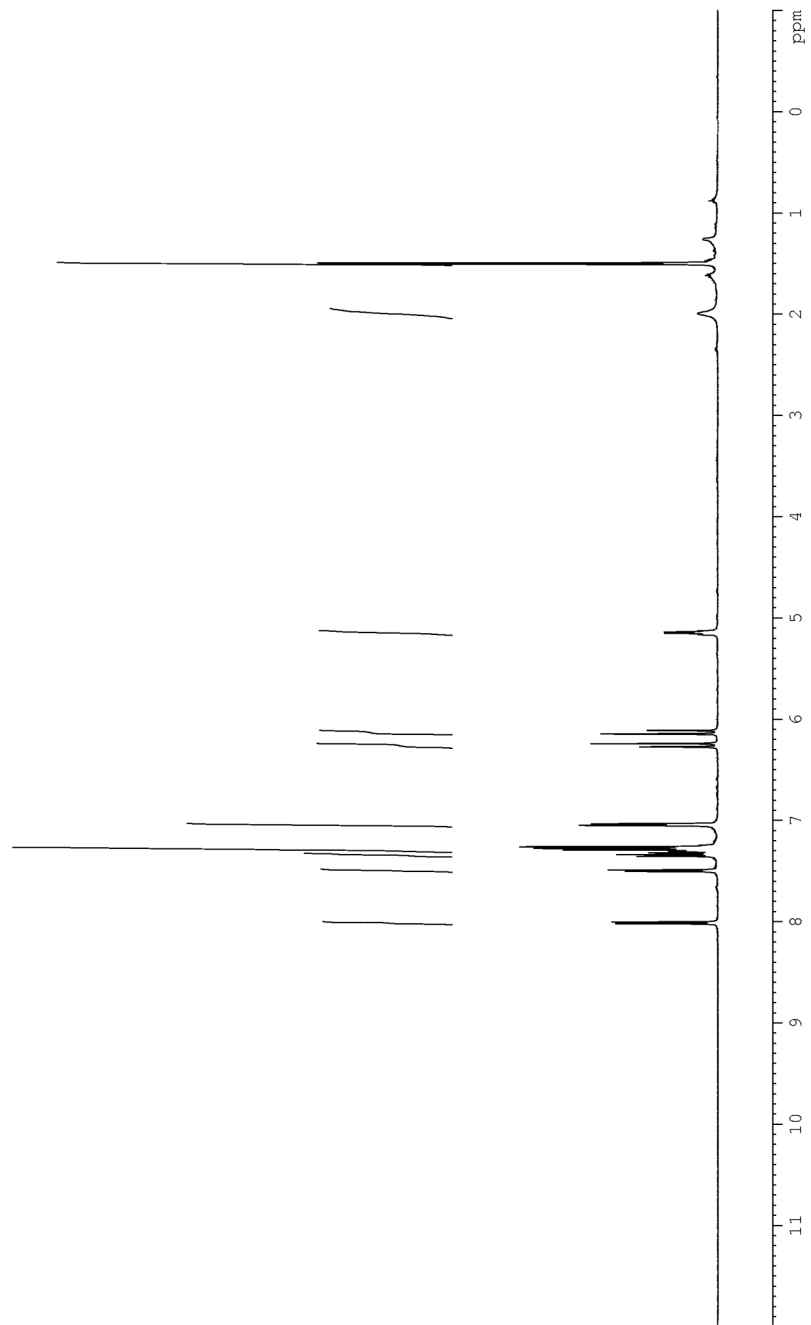

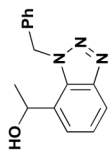

41

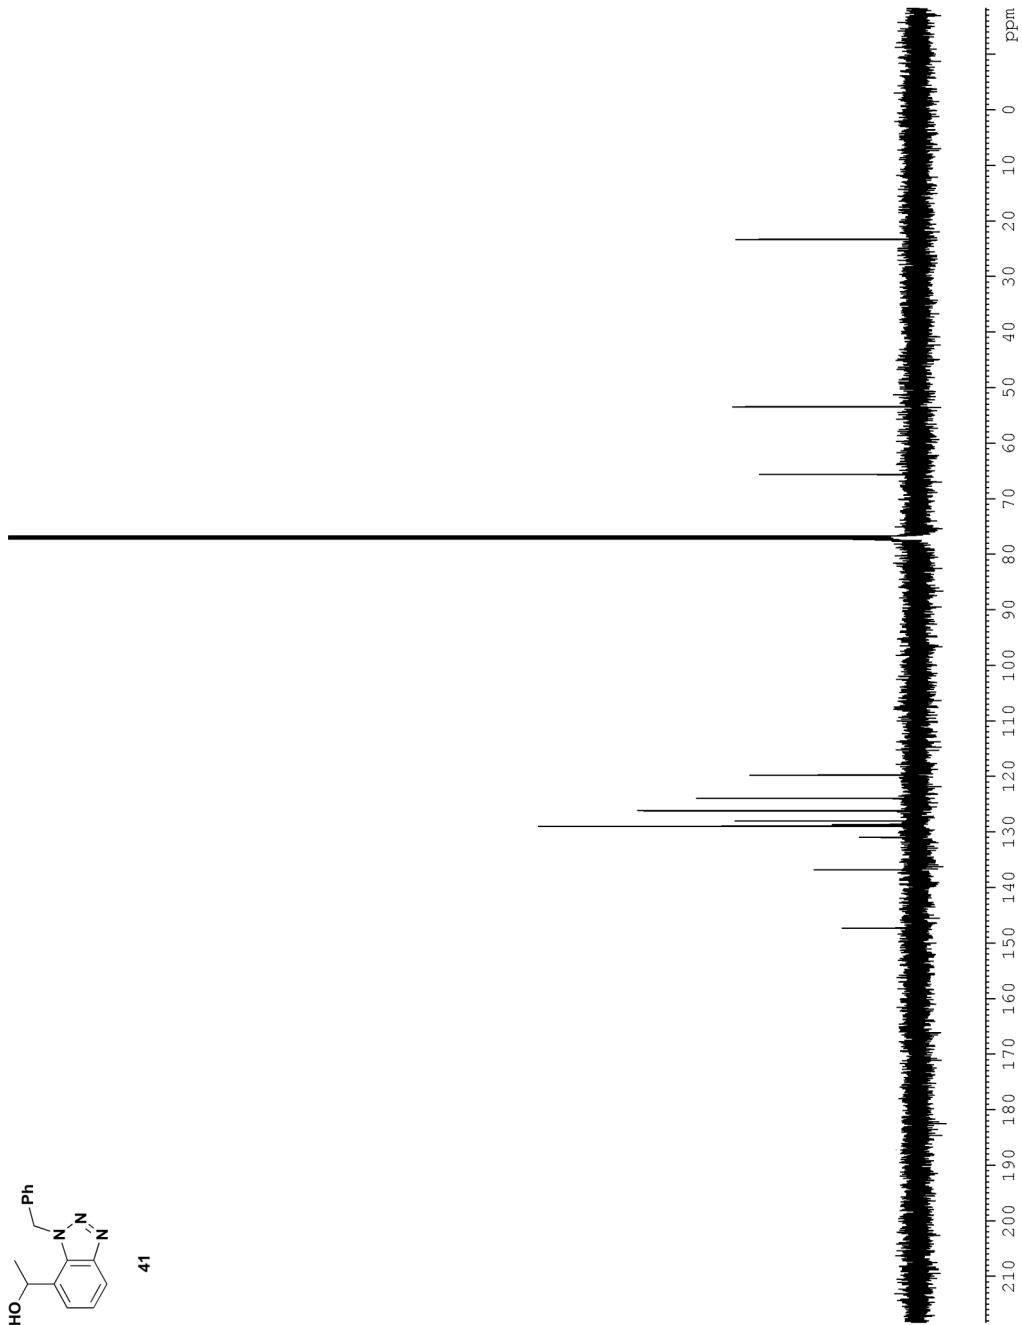

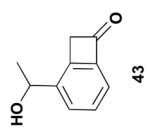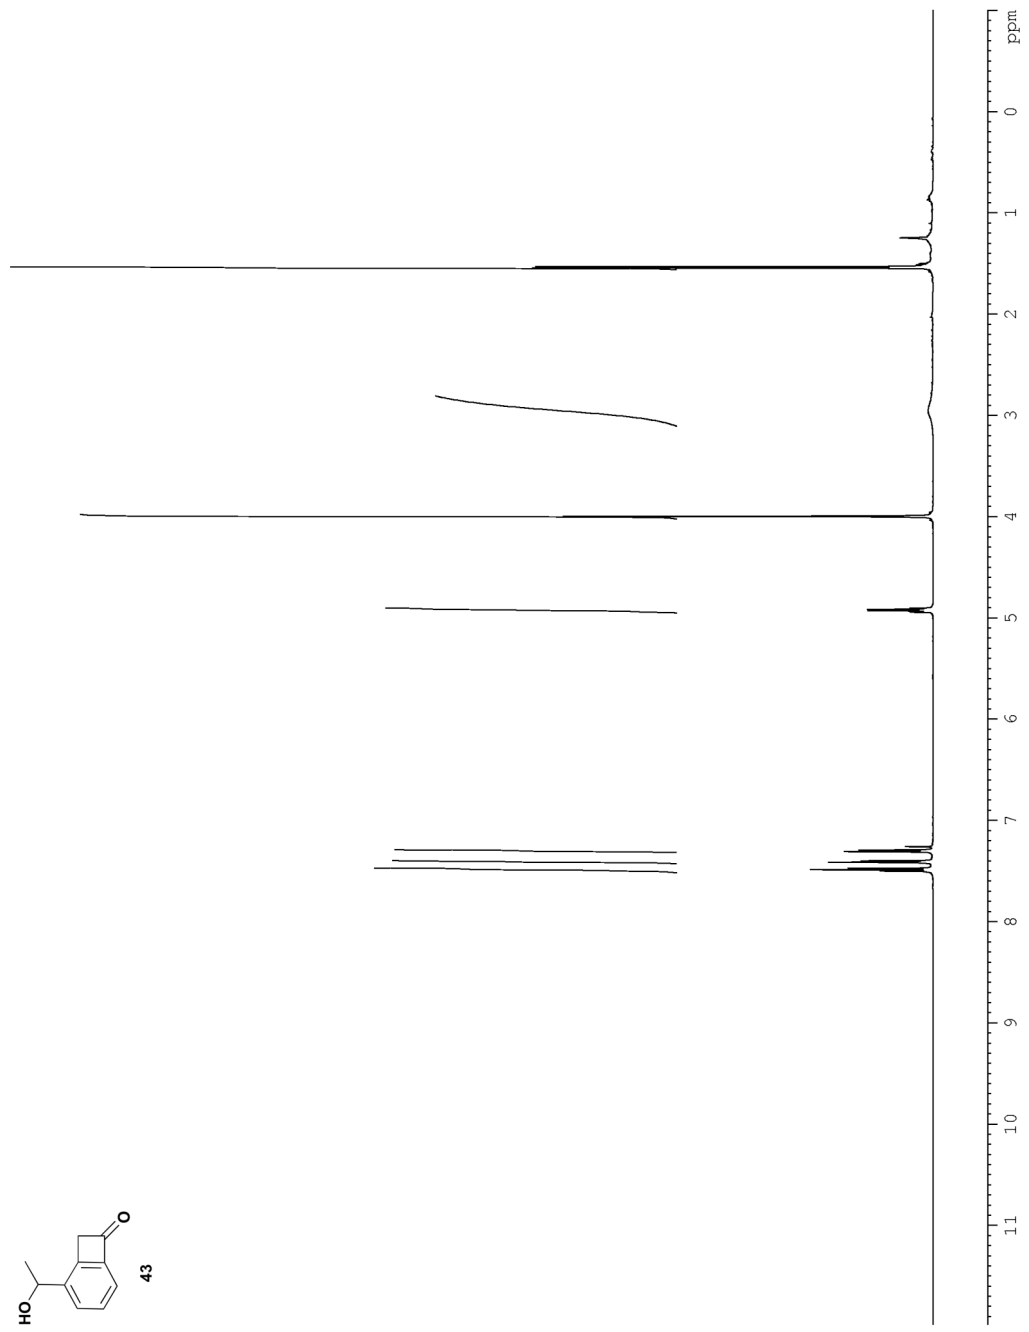

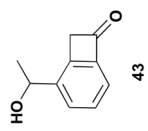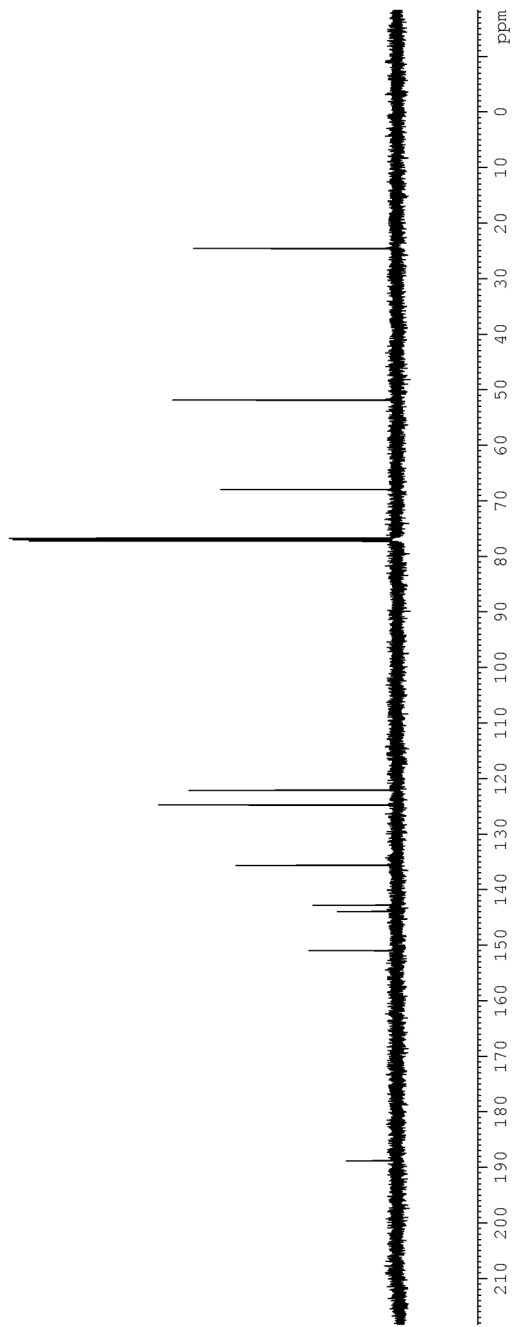

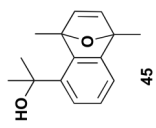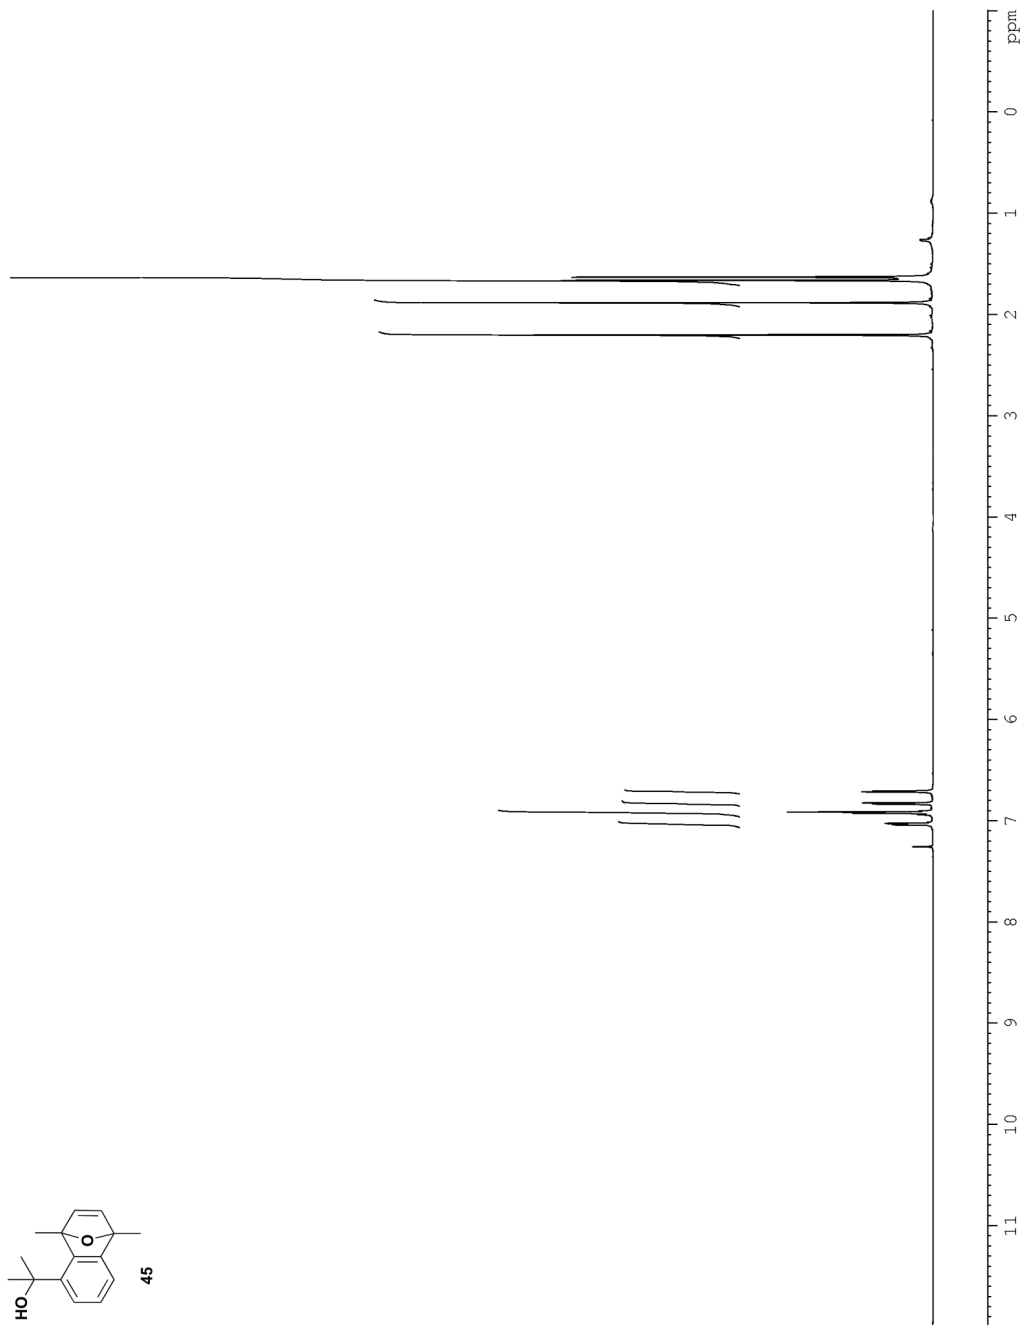

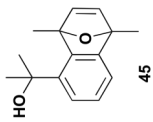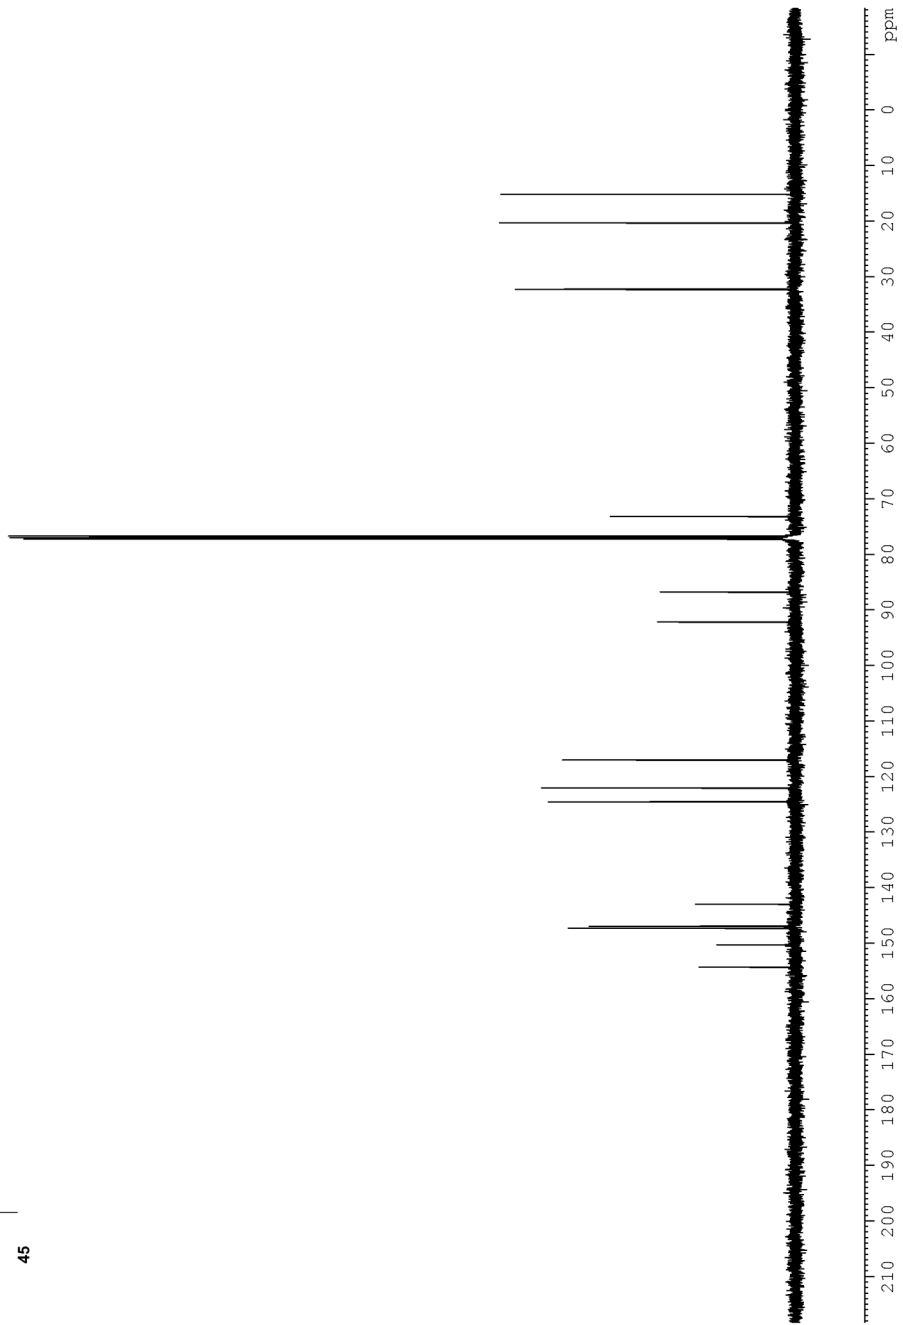

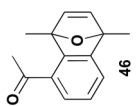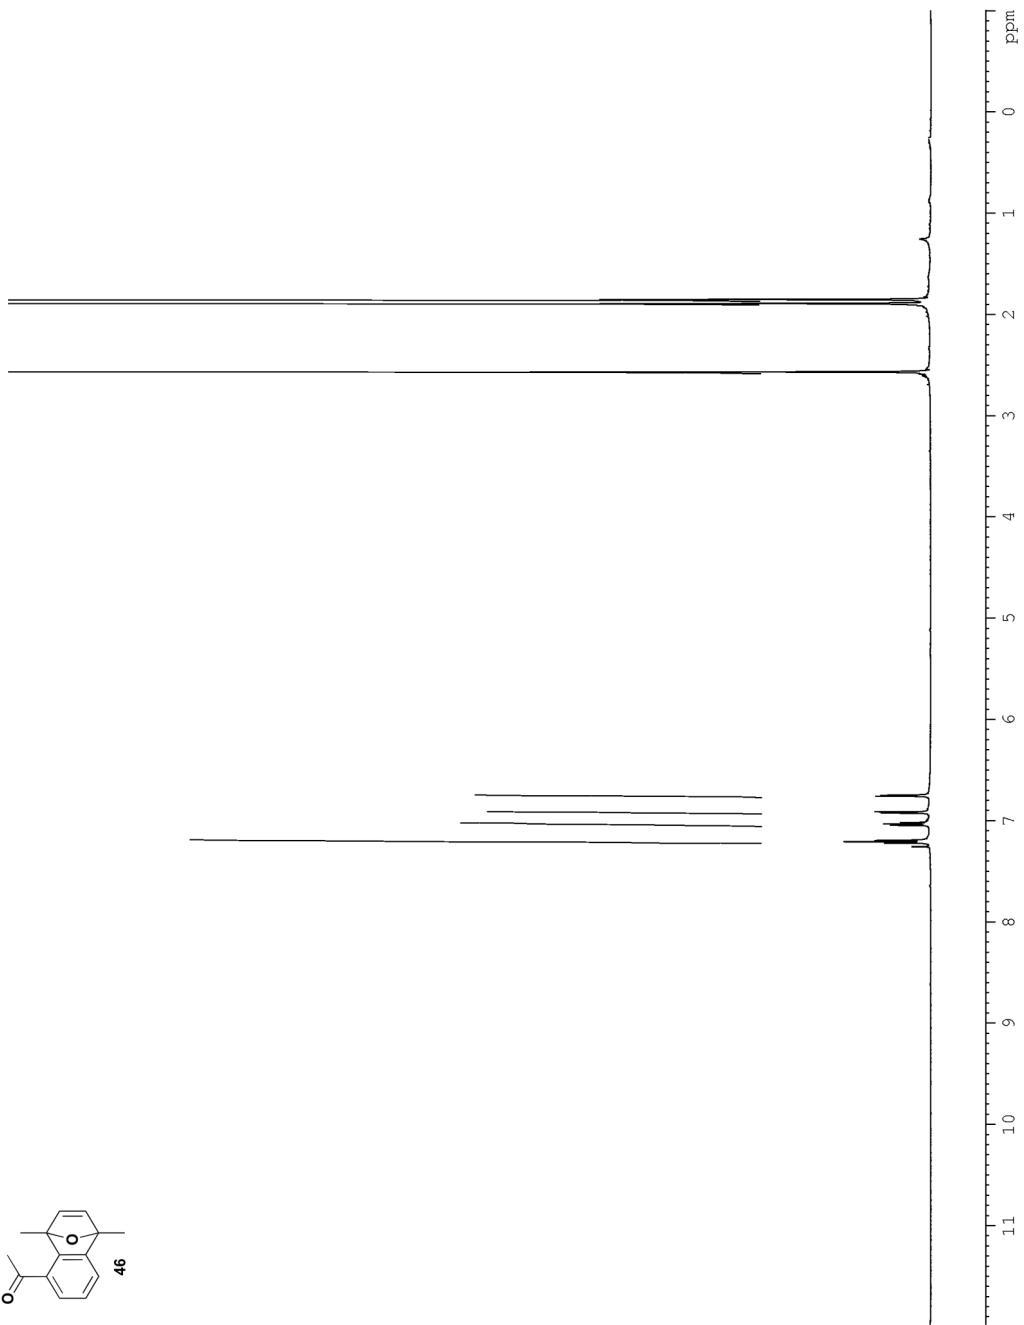

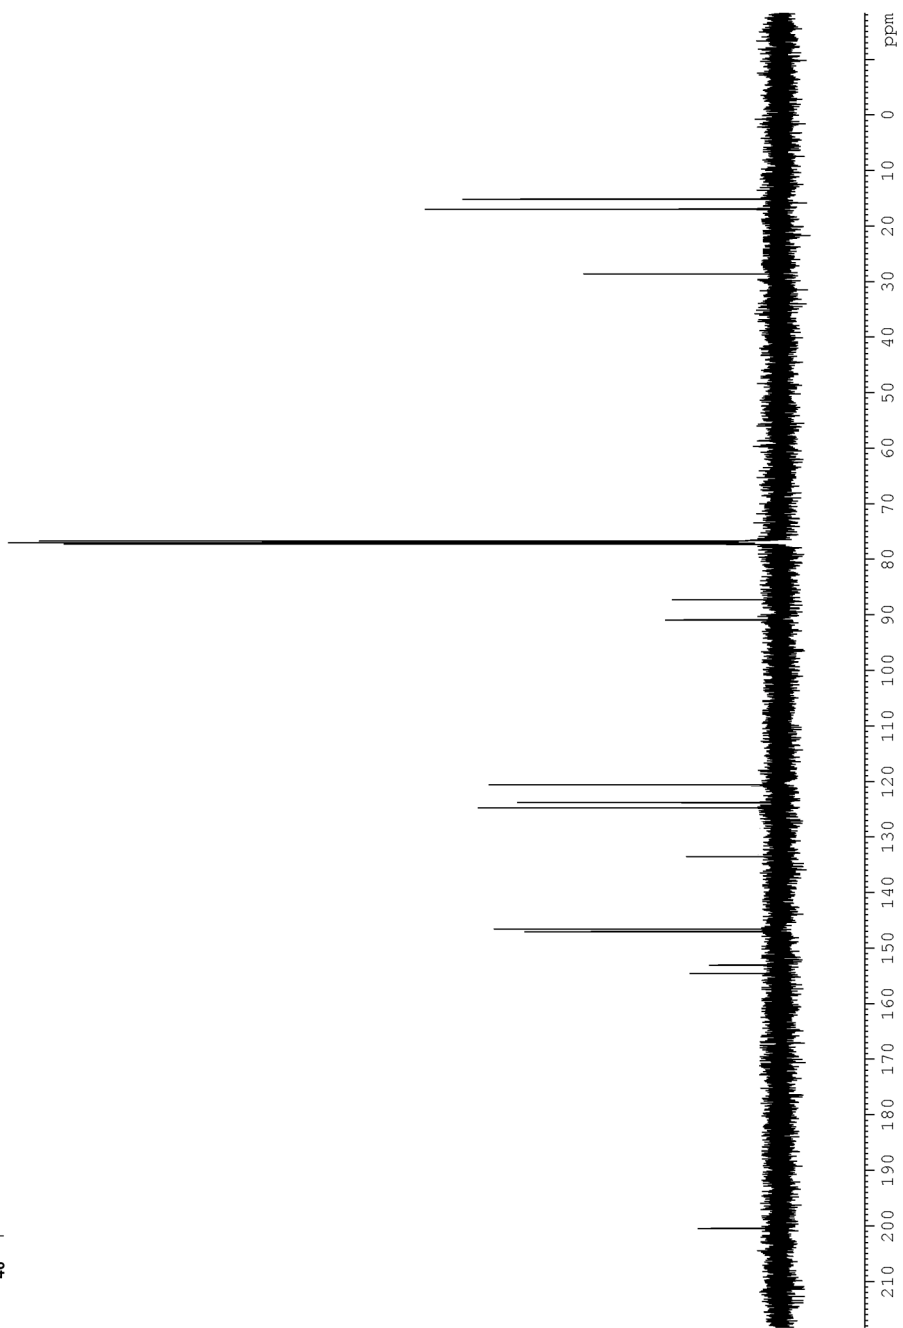



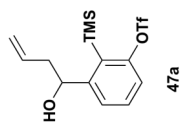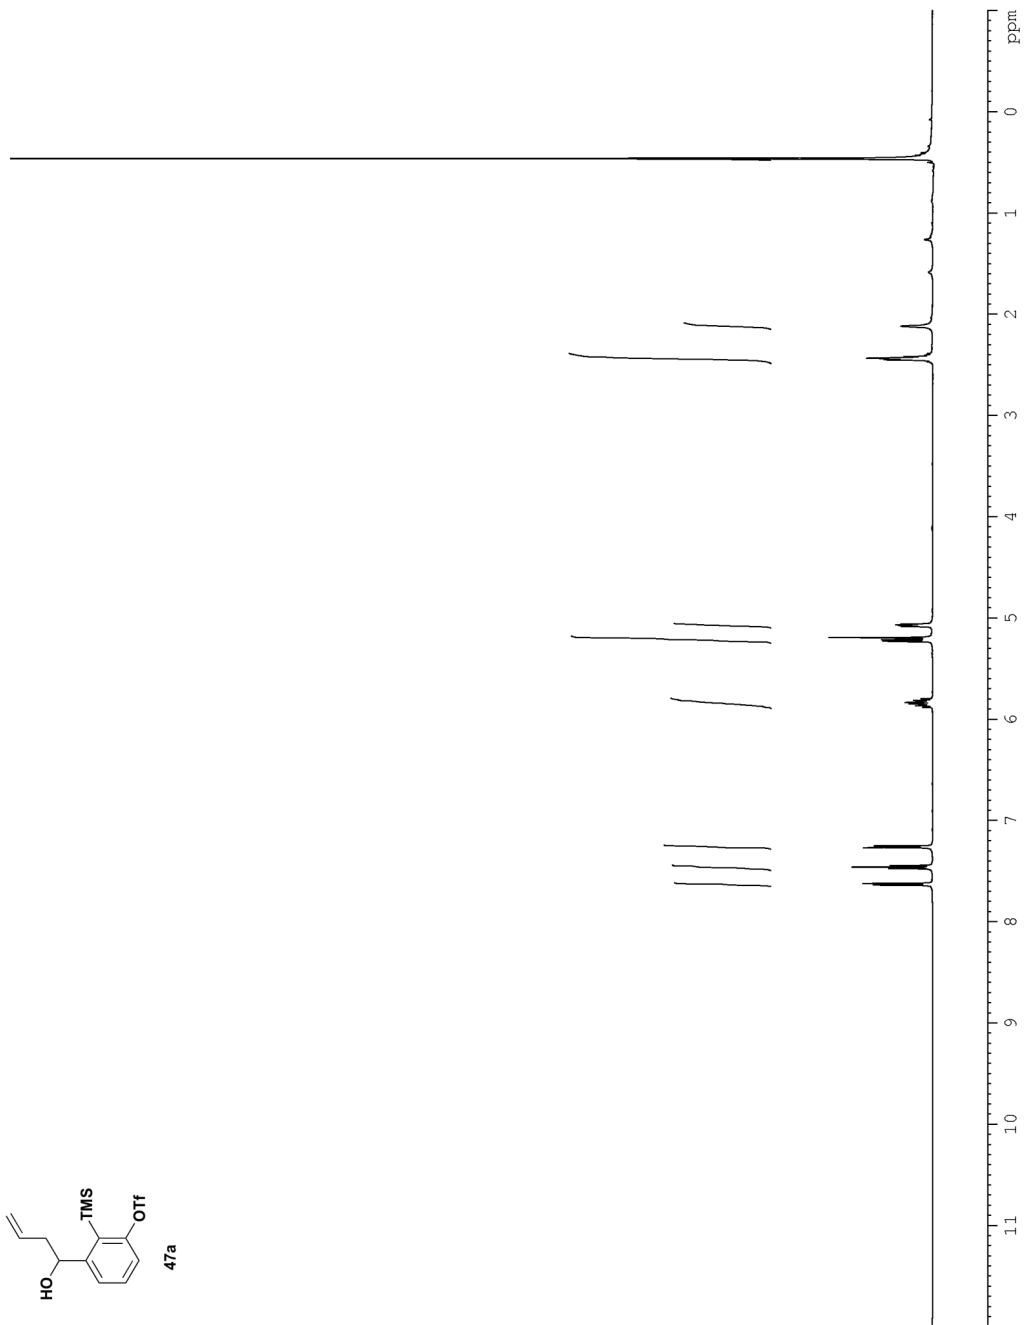

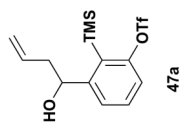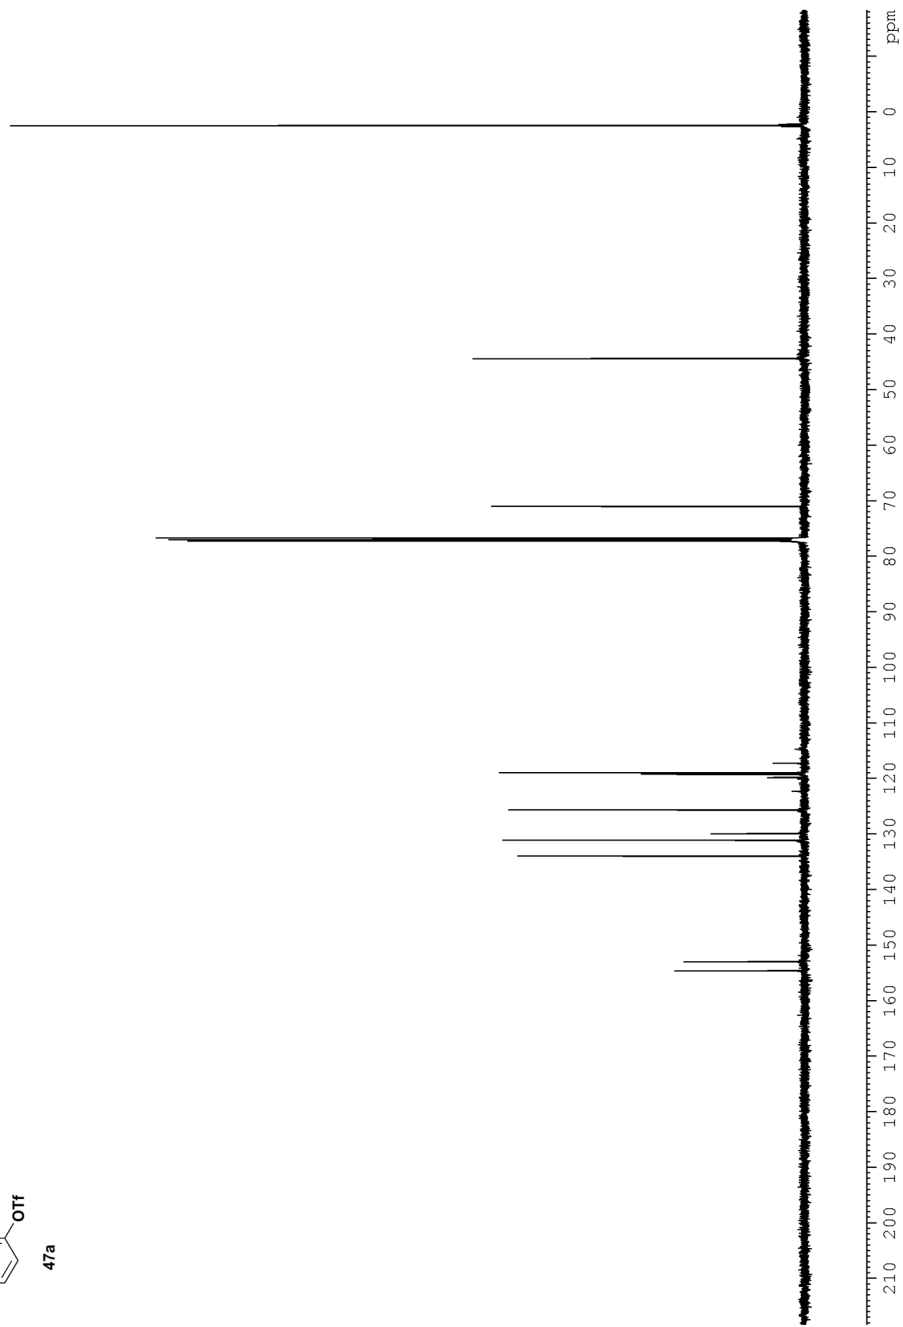



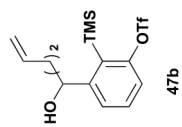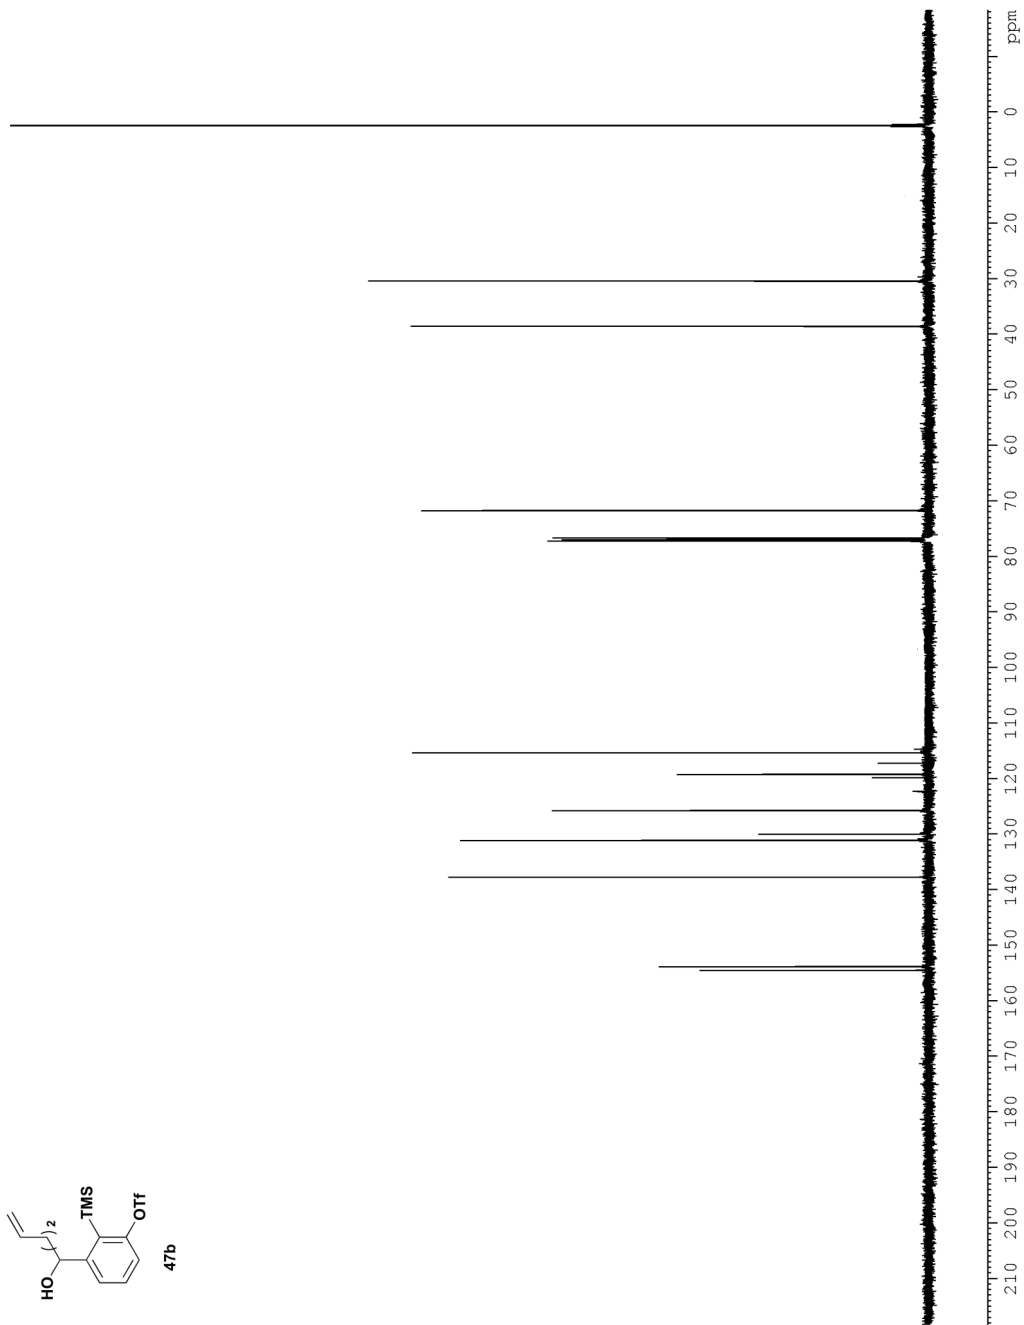



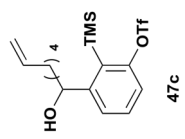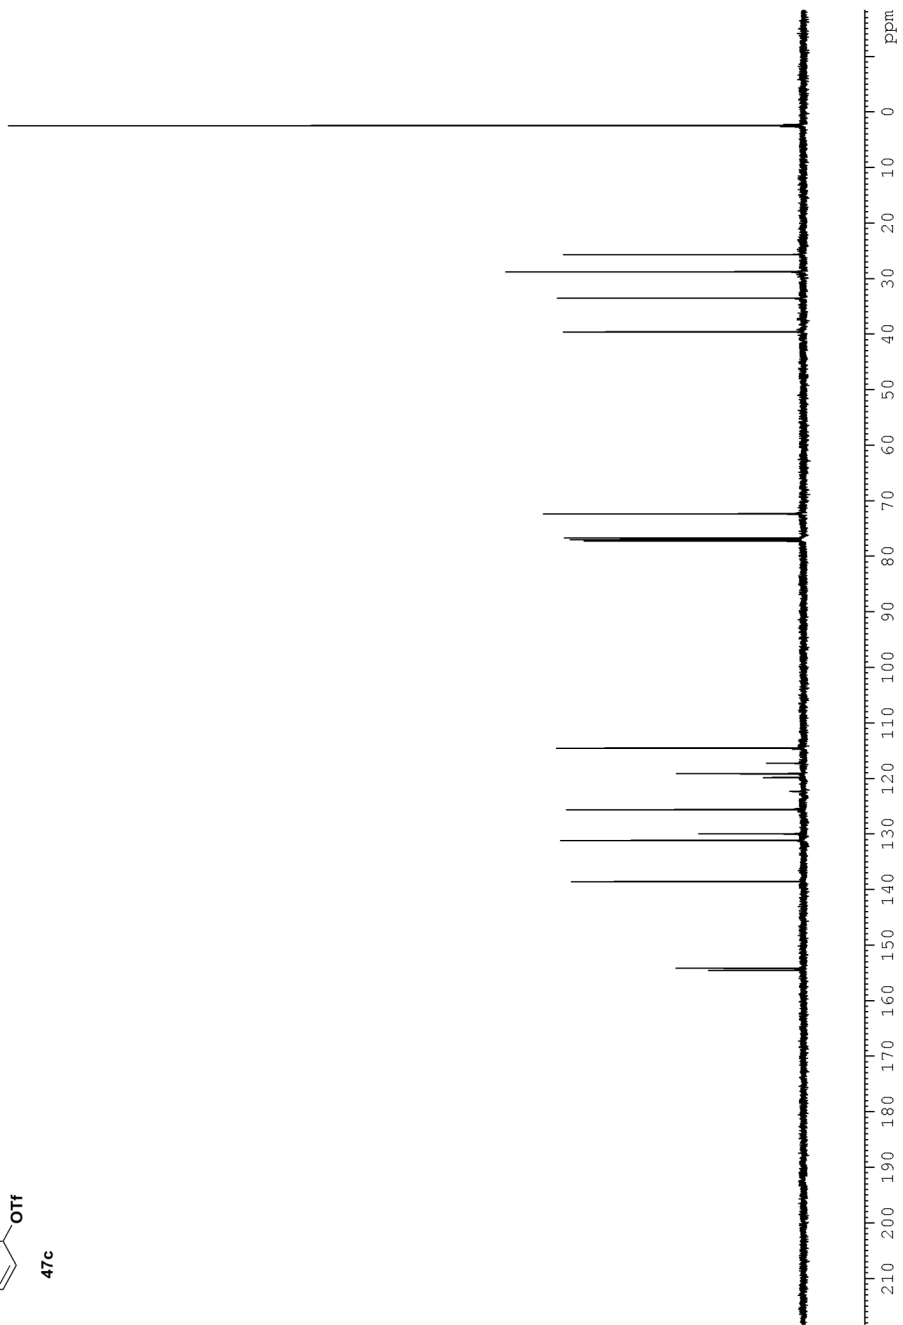

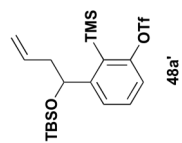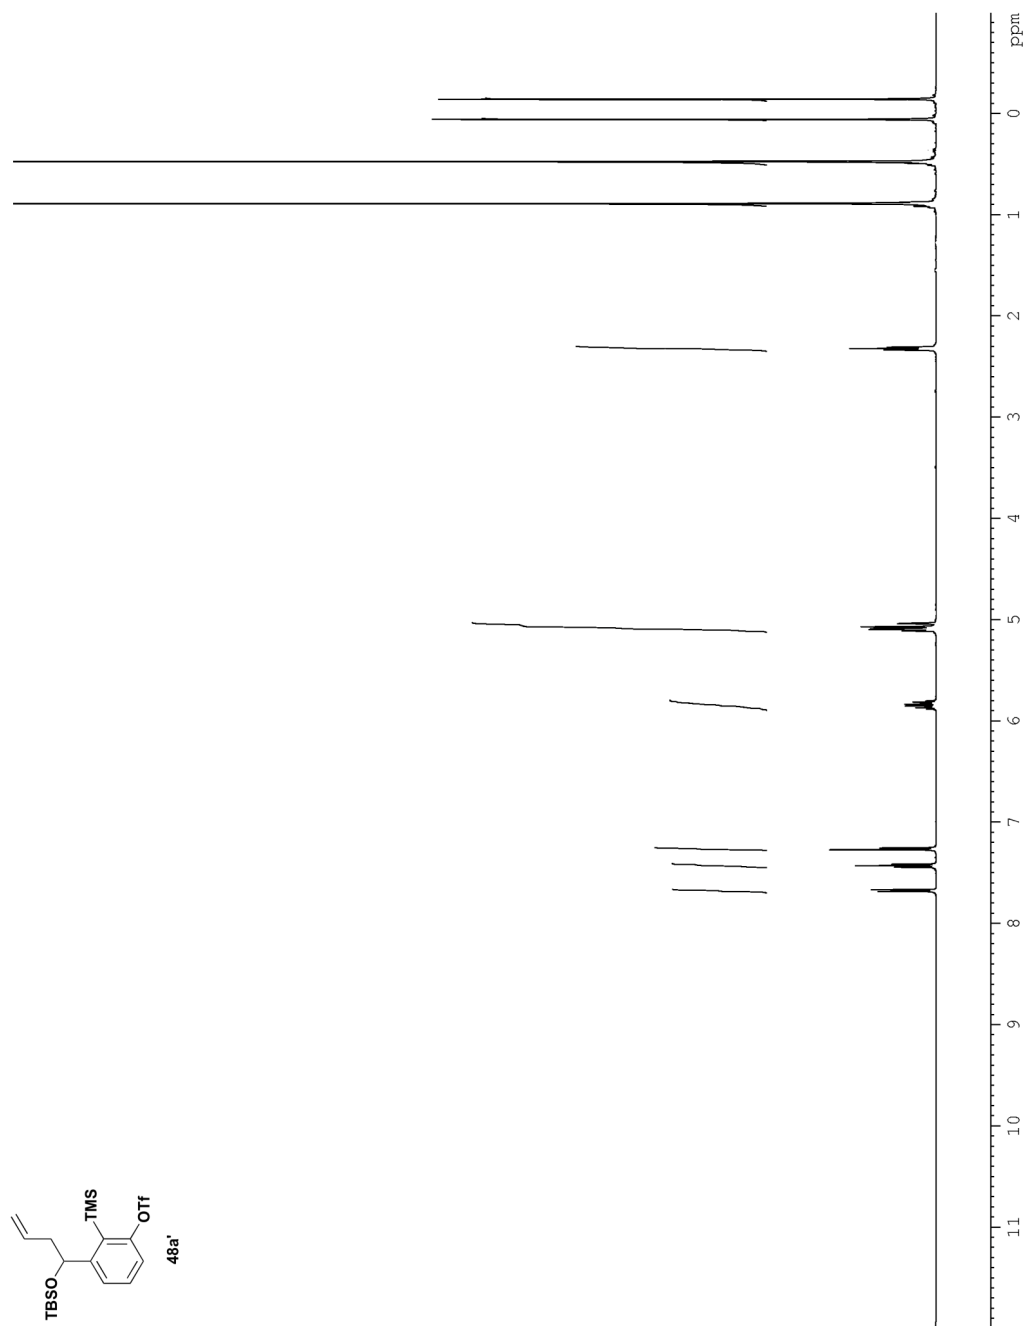

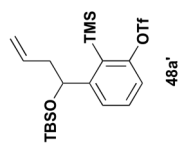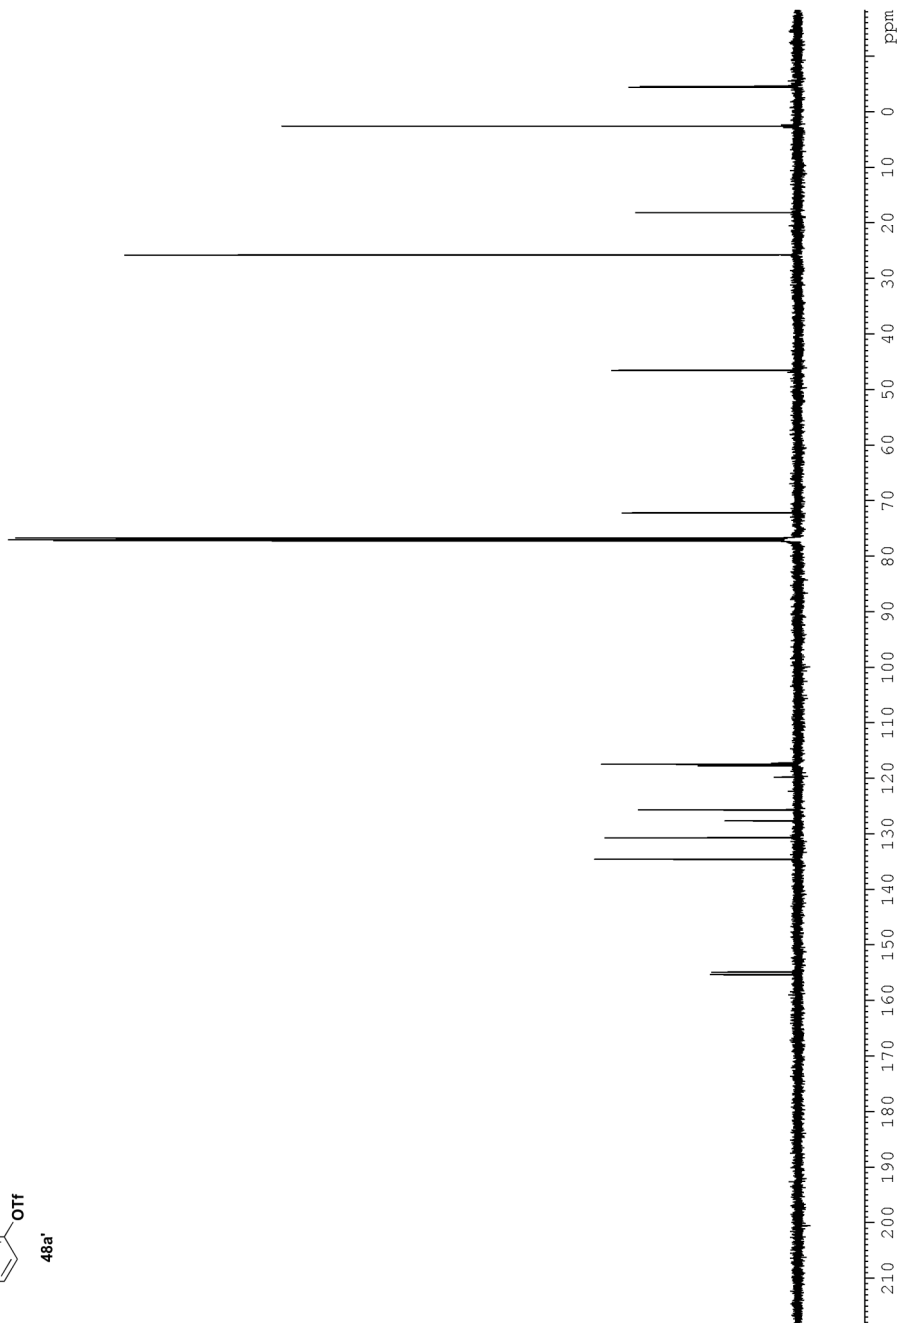





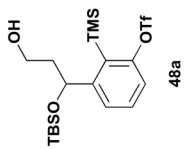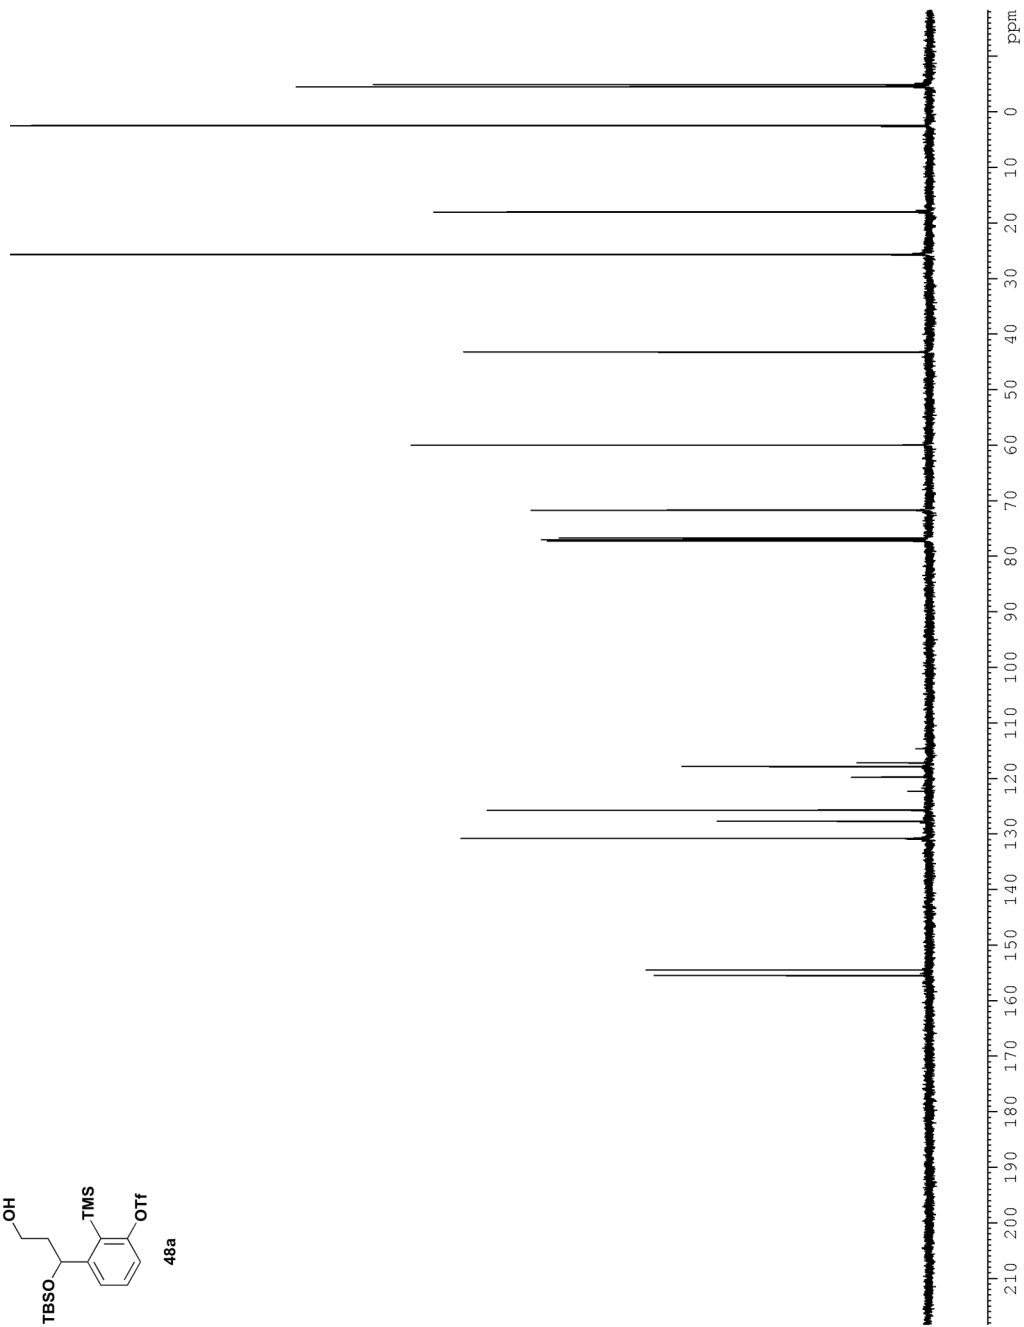

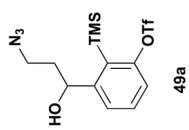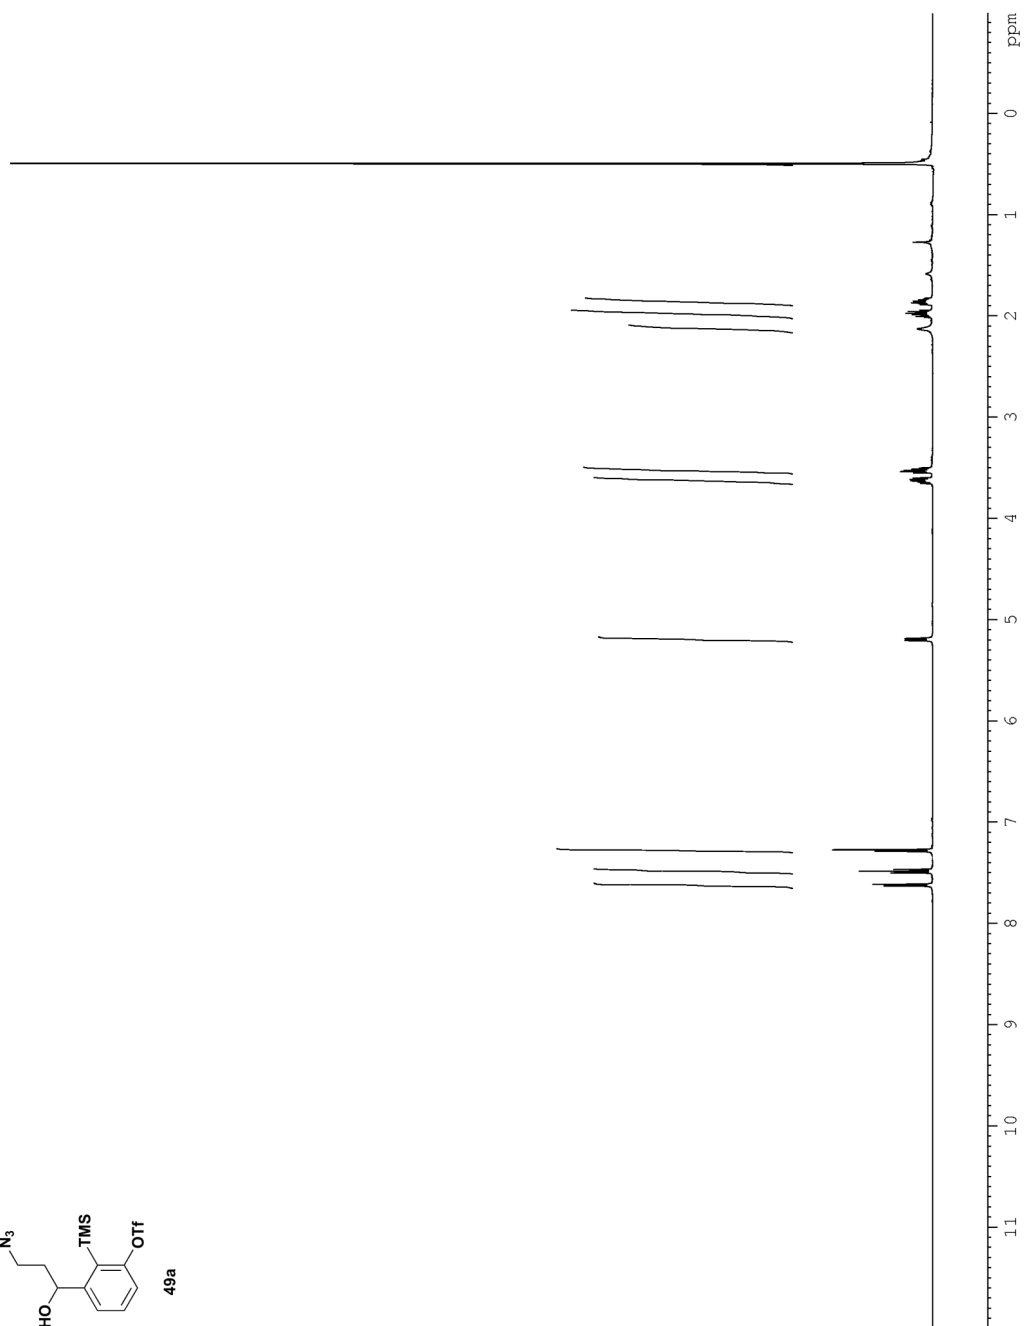

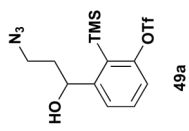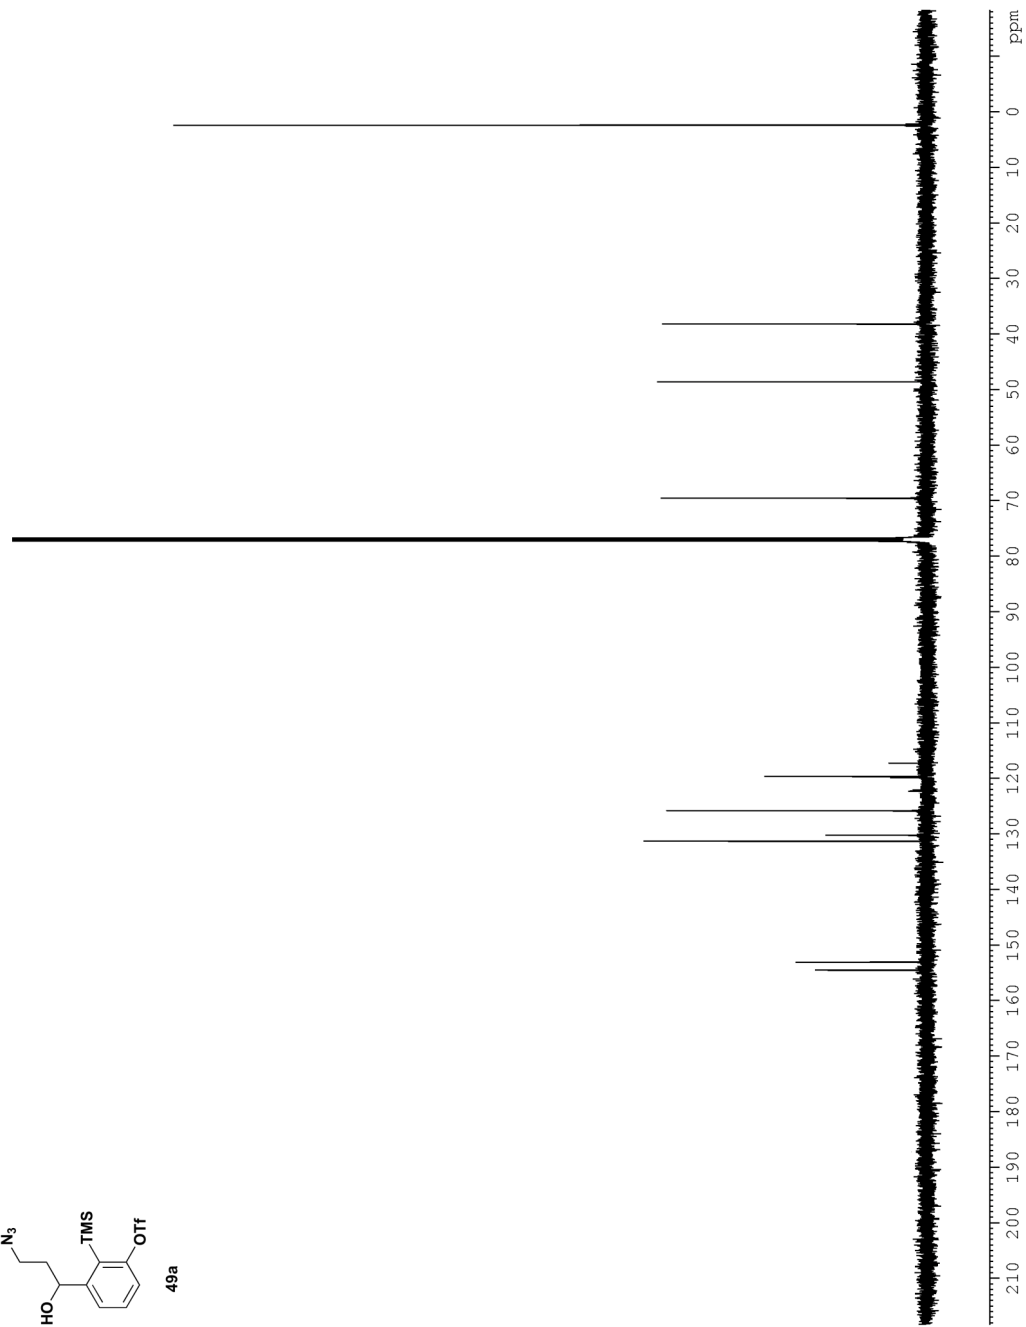

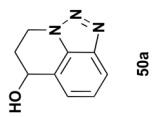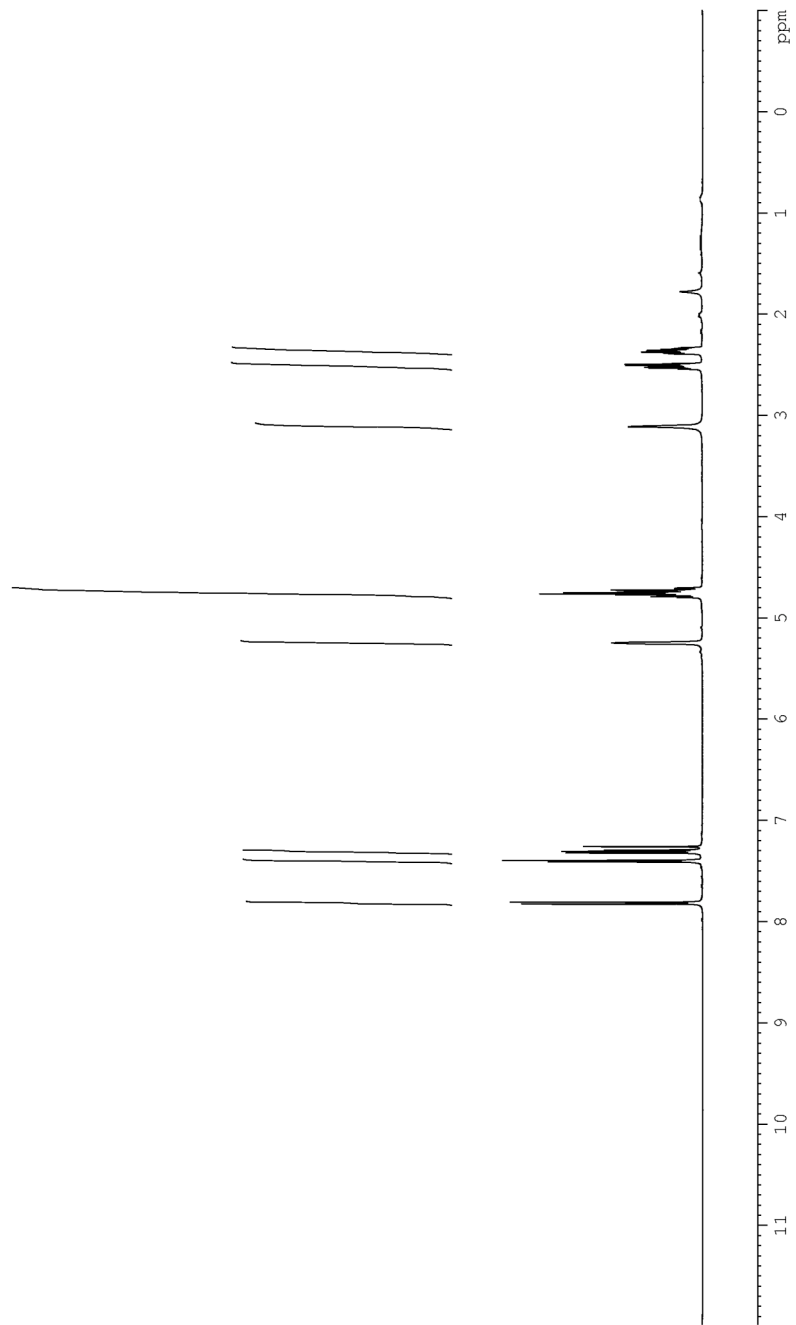

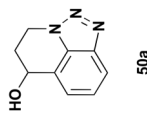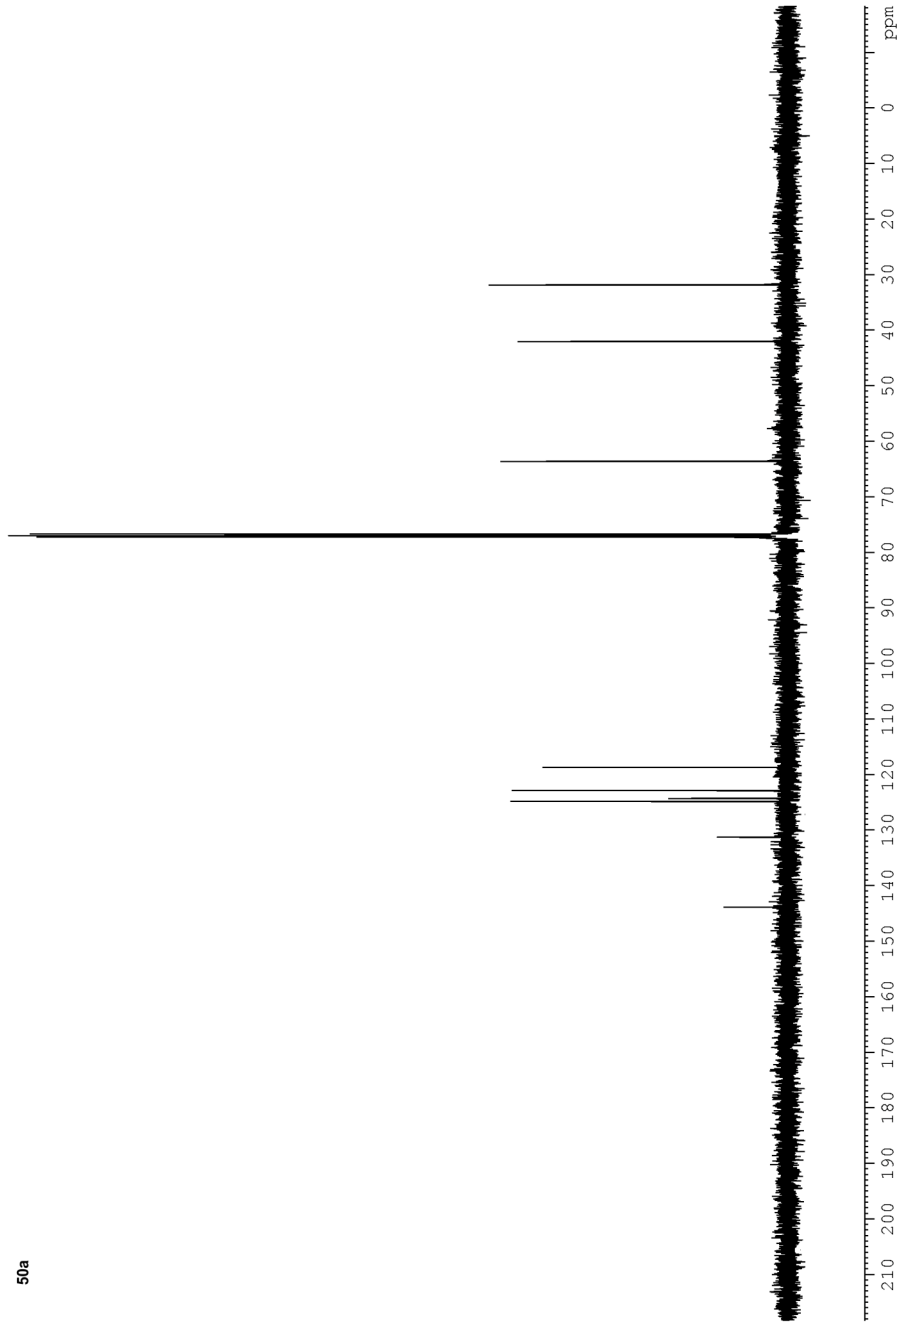

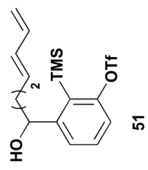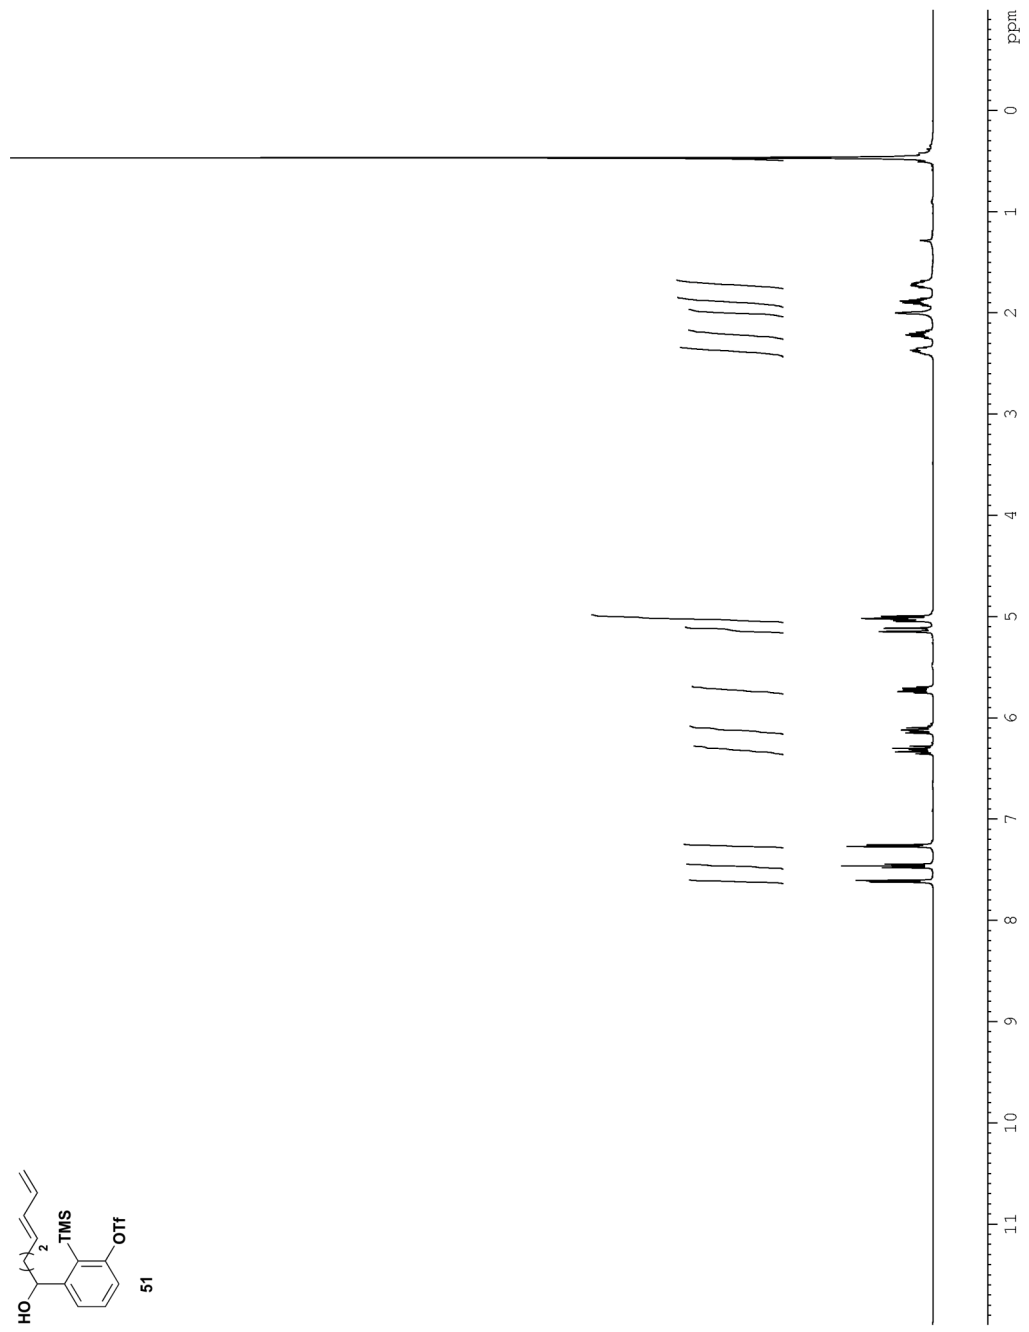

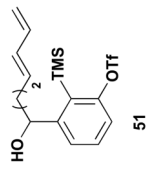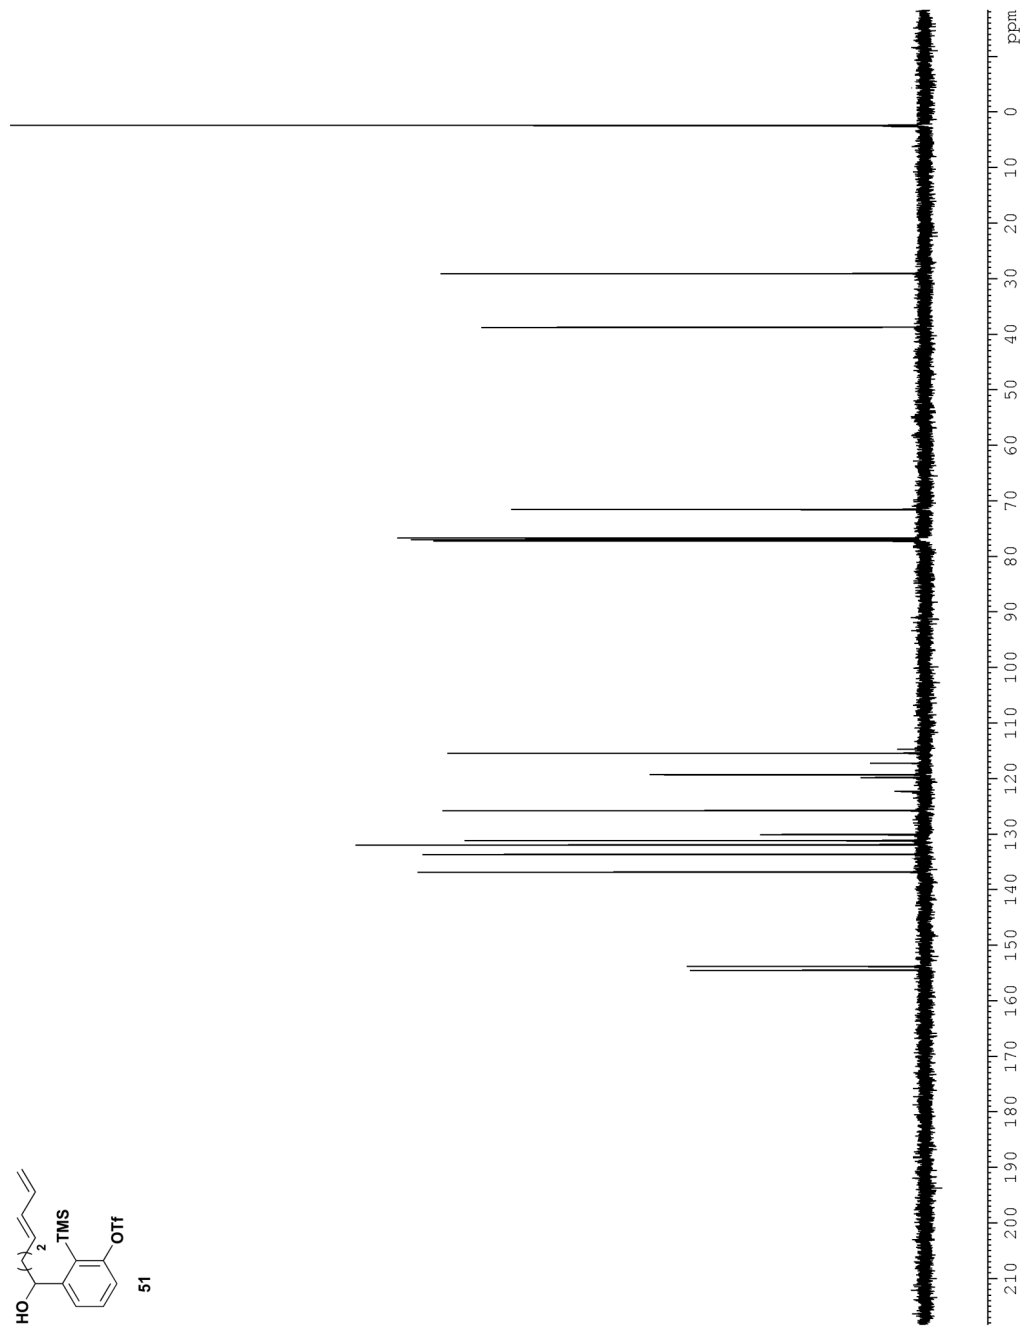



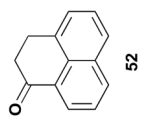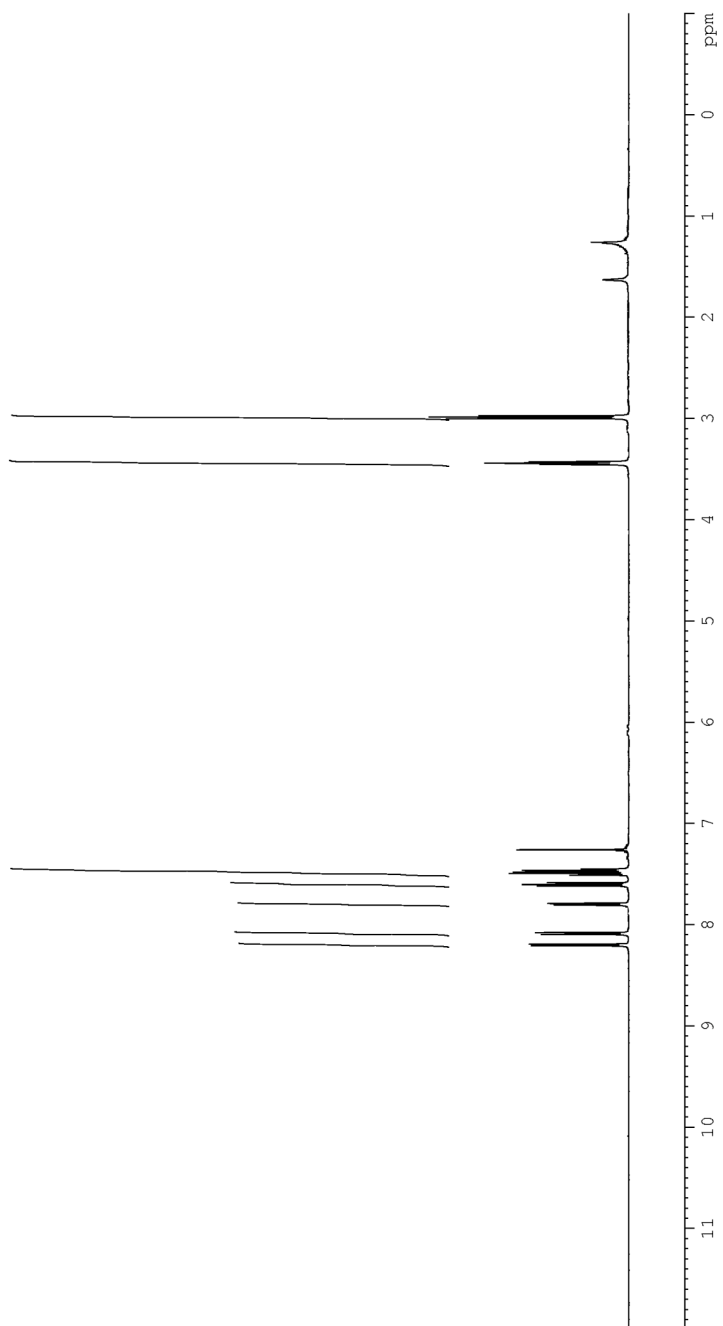

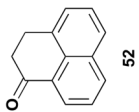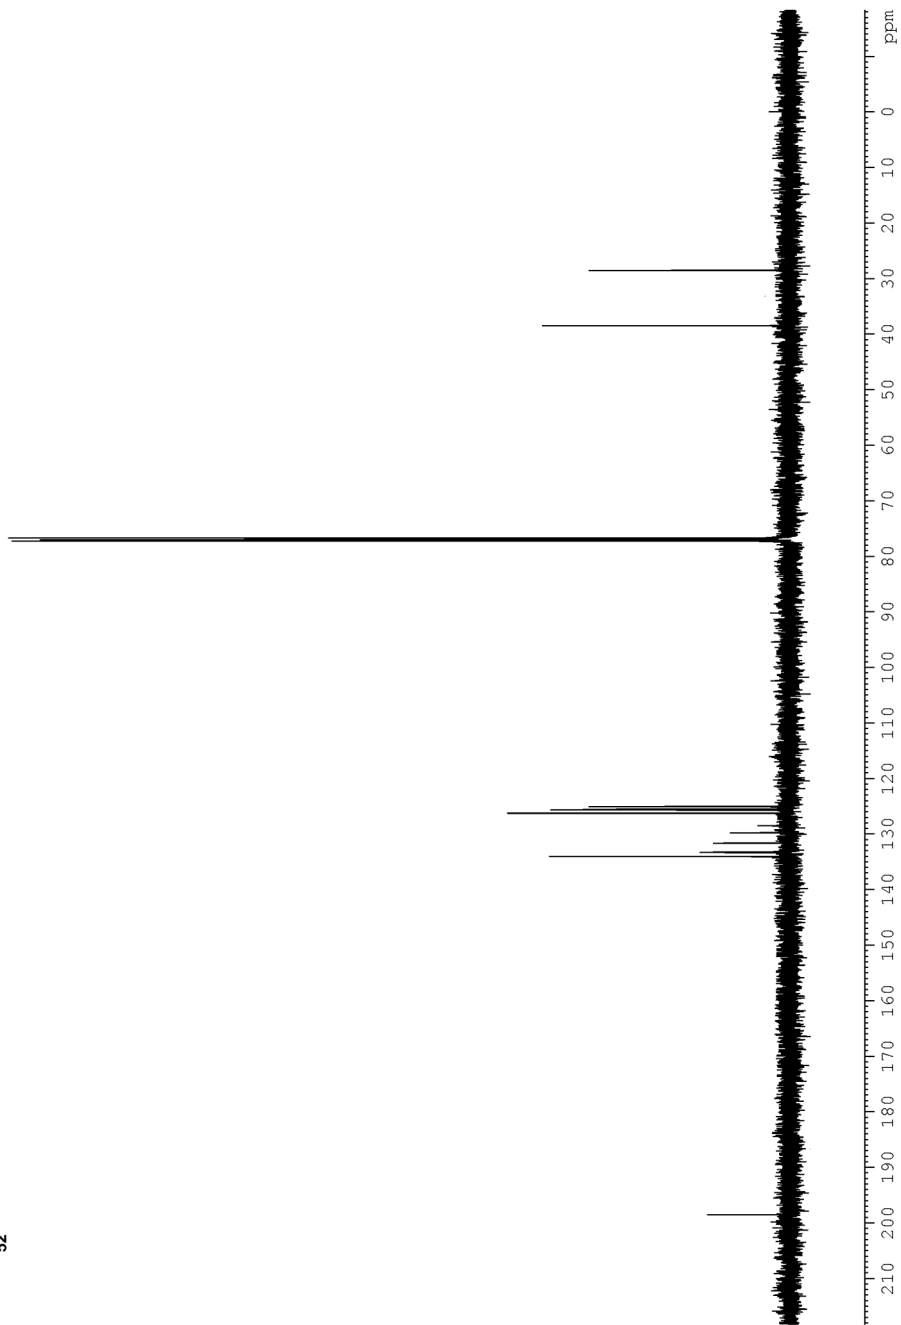

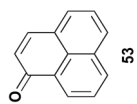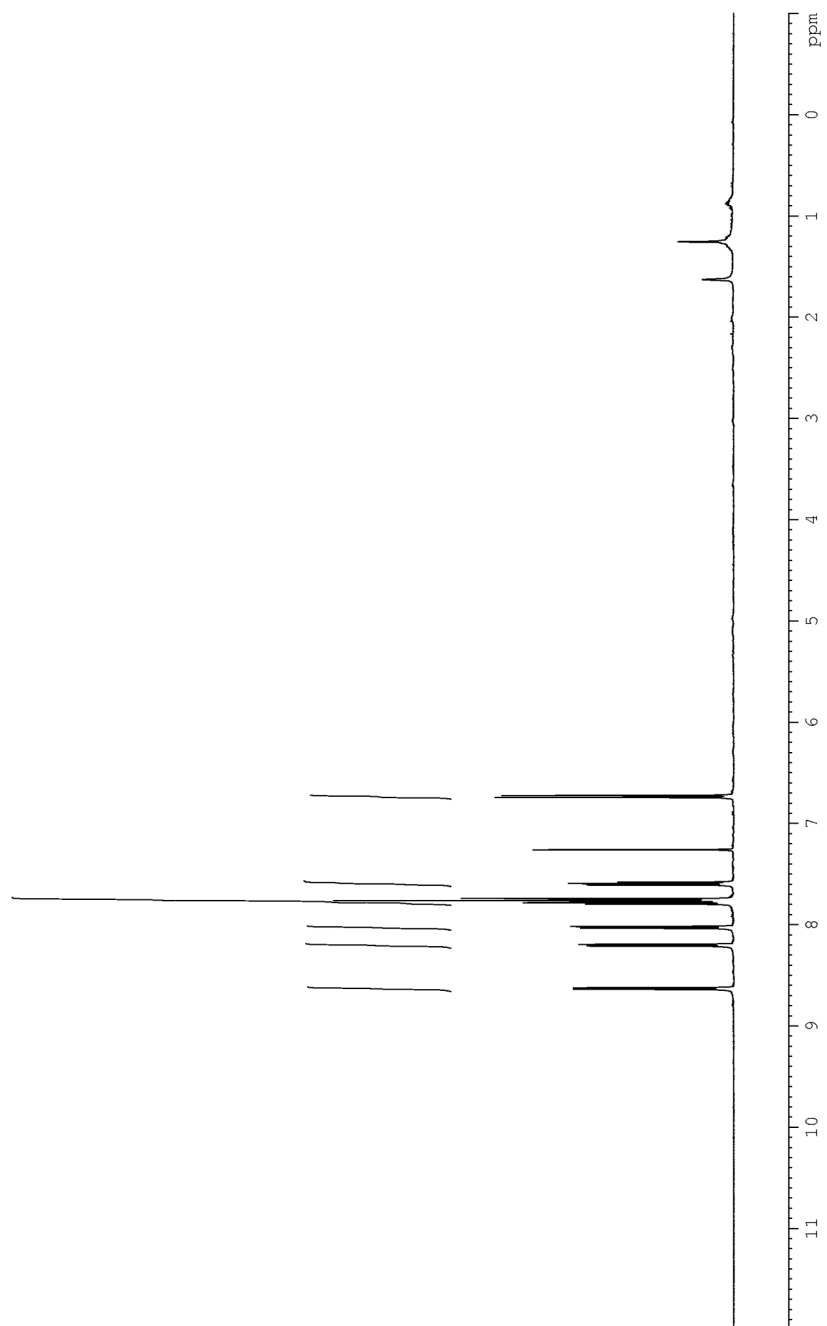

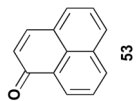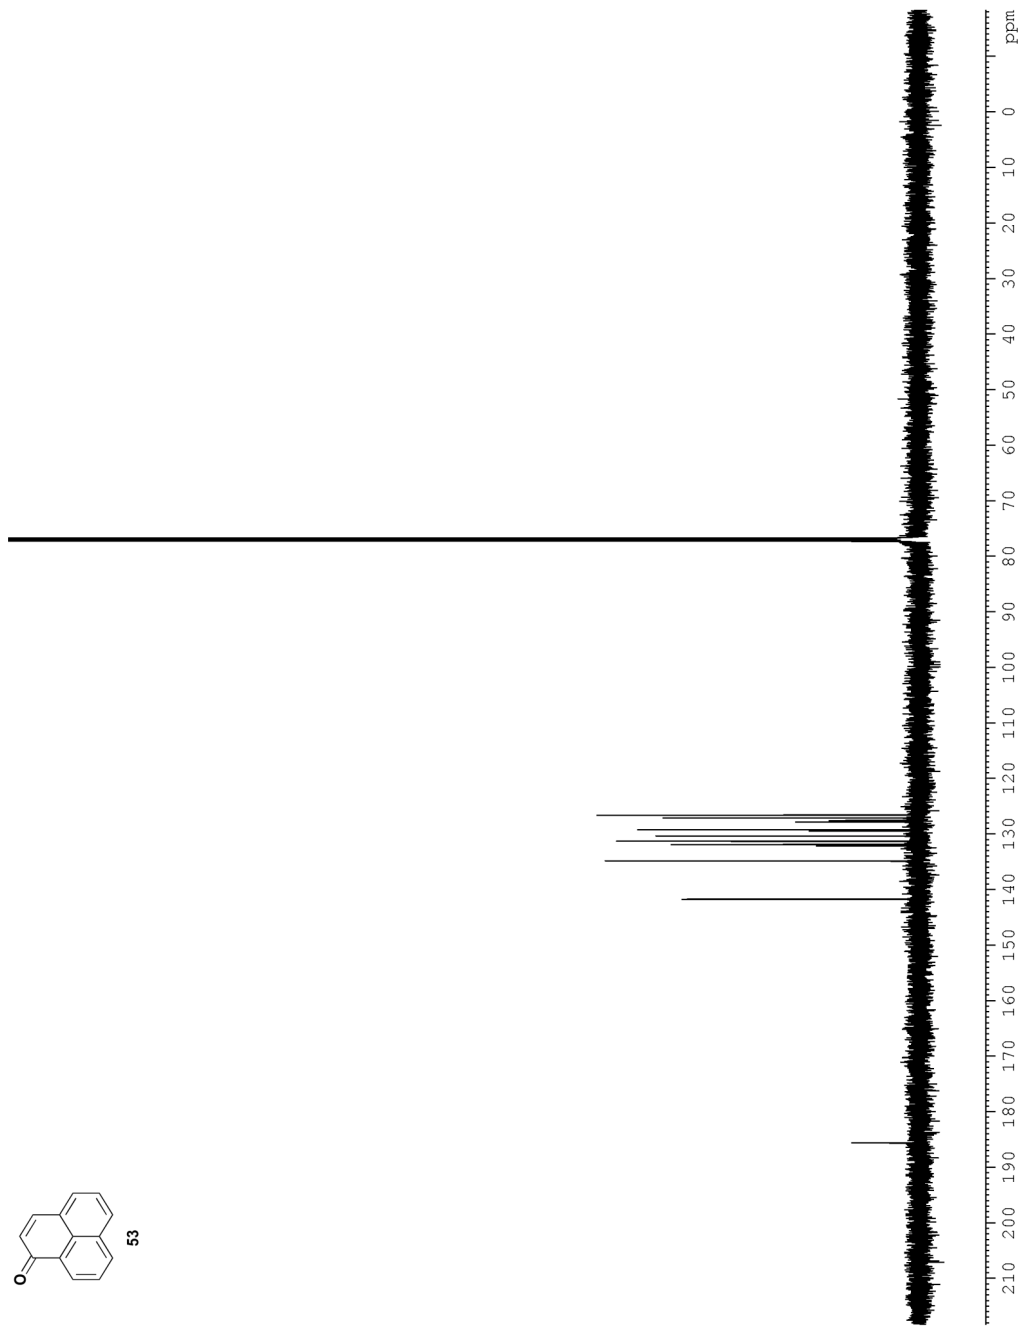

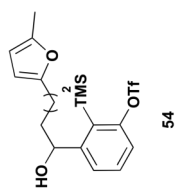

54

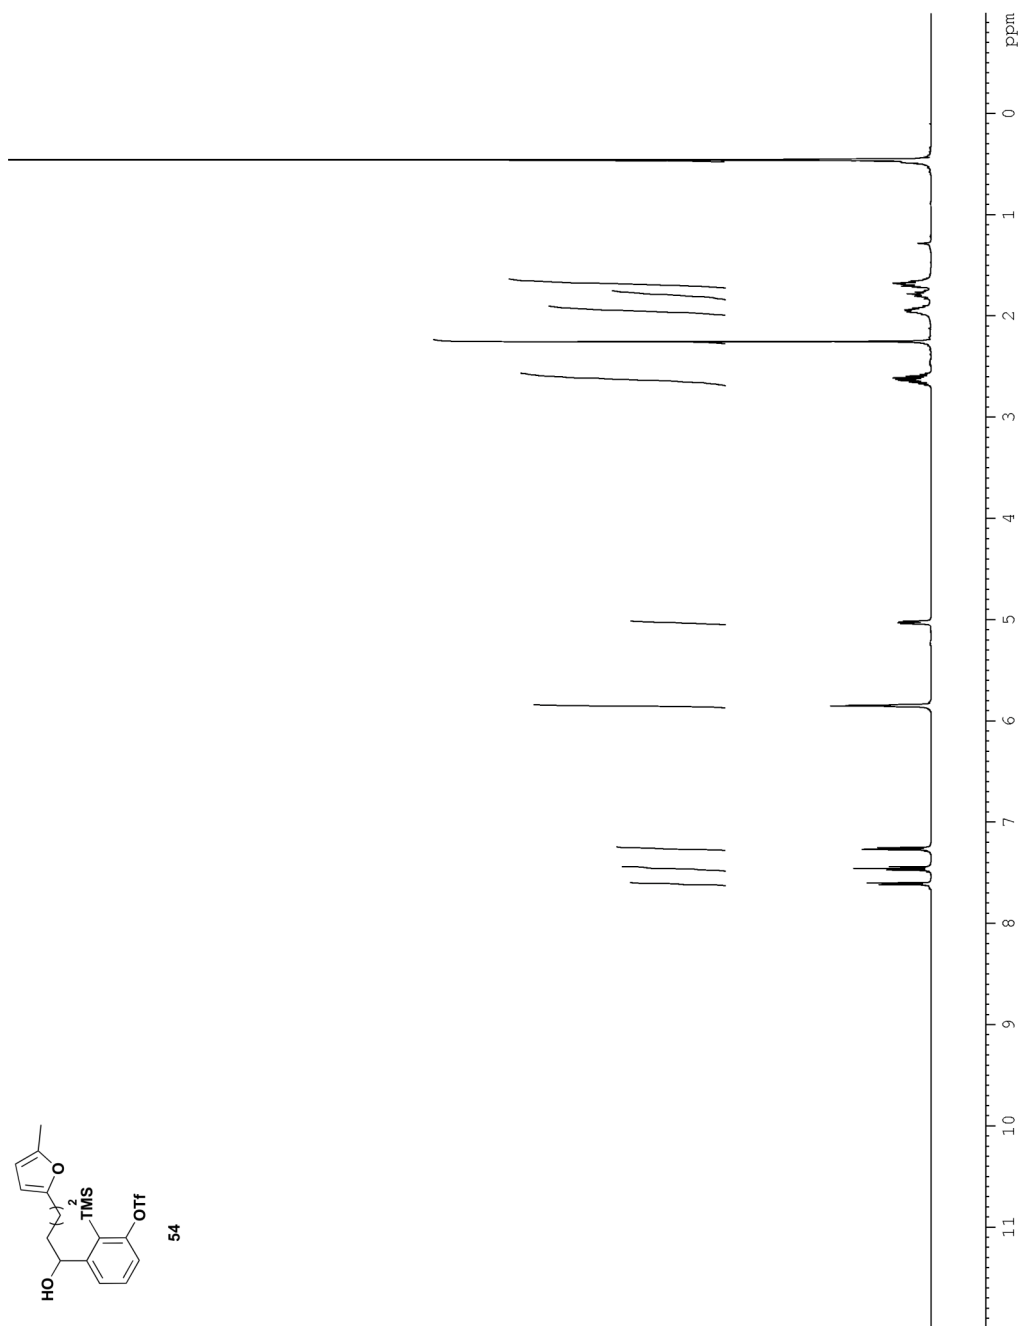

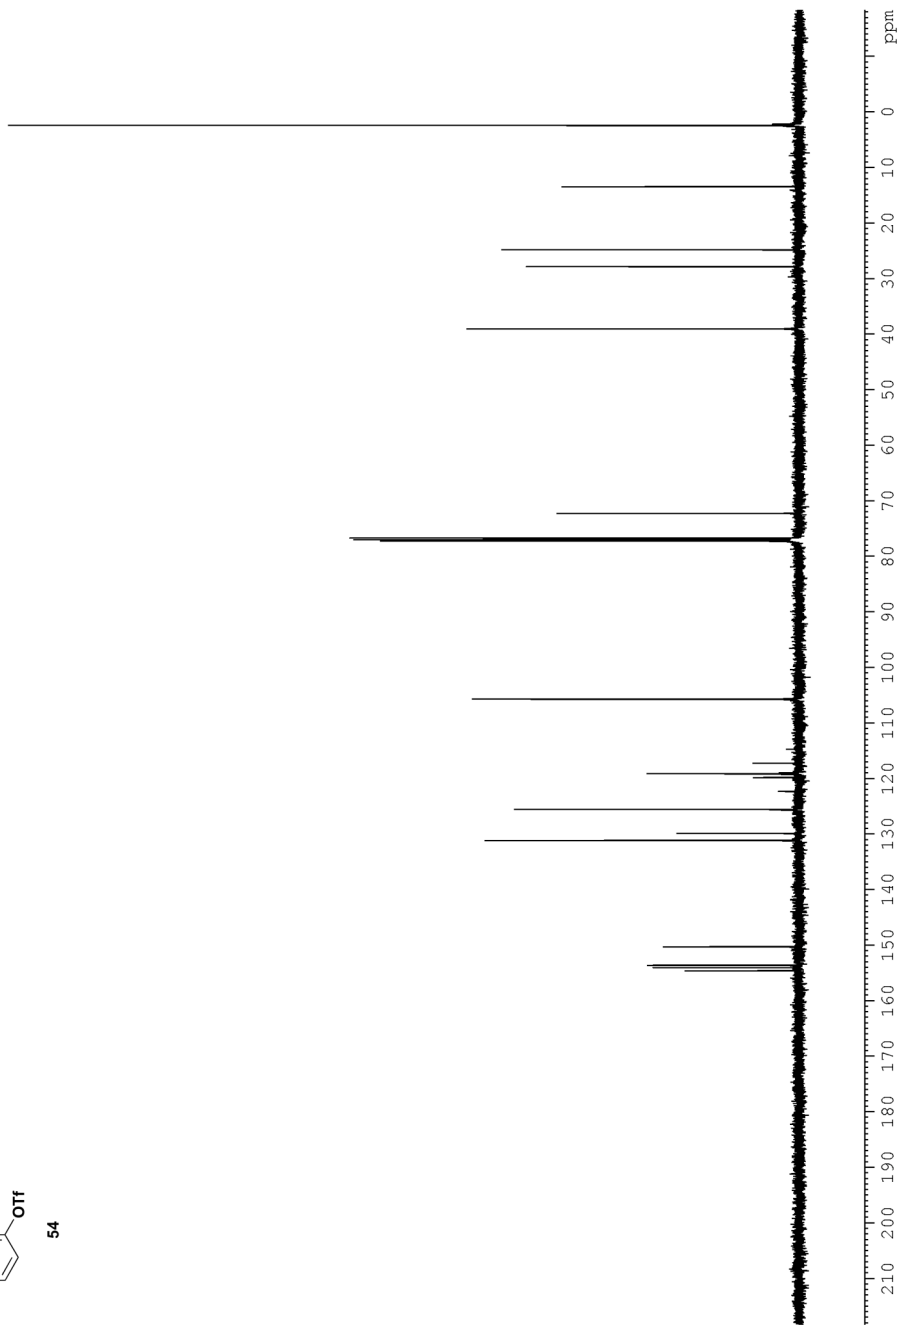

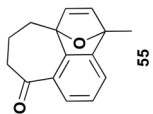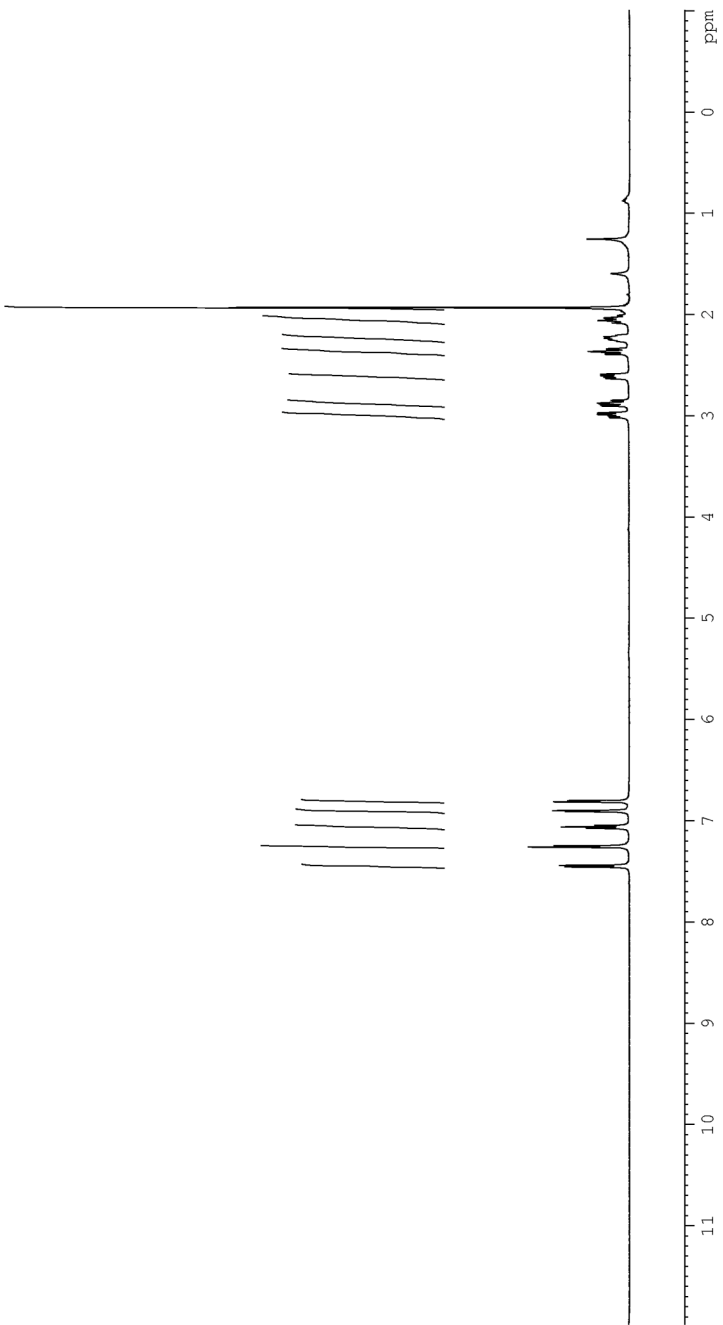

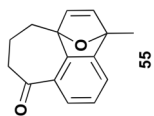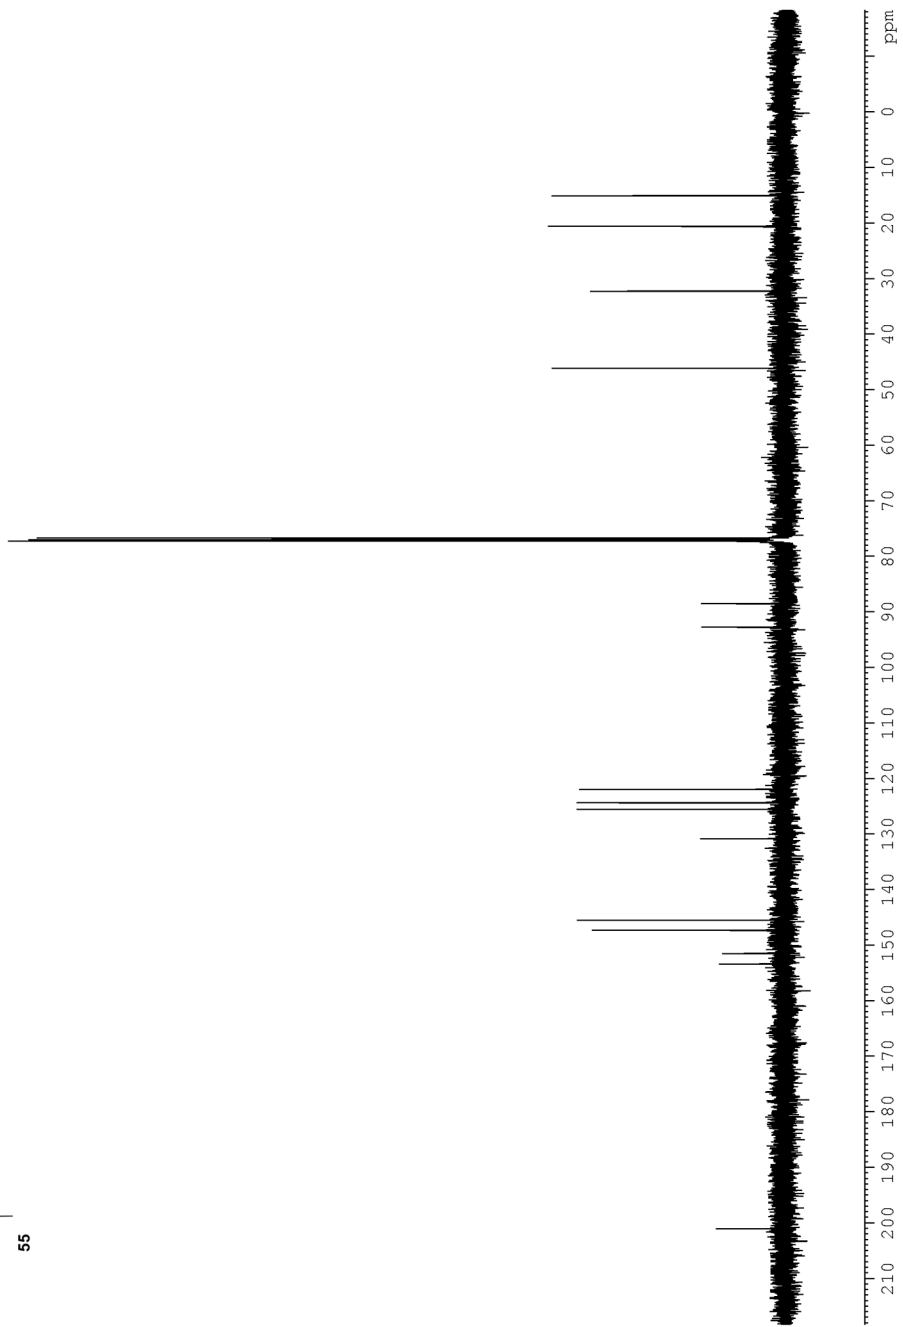

Supplement: 1015265108_sapp.pdf [file 1015265108_sapp.pdf]
